# Supplementary material for: Blue-luminescent 5-(3-indolyl)oxazoles via microwave-assisted three-component coupling–cycloisomerization–Fischer indole synthesis
Source: Royal Society of Chemistry journal article supplement (doi:10.1039/c1ob06153d), 2011-01-01
Supplement: c1ob06153d.pdf [file c1ob06153d.pdf]

Supporting Info

**Blue-luminescent 5-(3-indolyl)oxazoles via microwave-assisted  
three-component coupling-cycloisomerization-Fischer indole  
synthesis**

Oliver Grotkopp, Atia Ahmad, Walter Frank, and Thomas J. J. Müller\*

Institut für Organische Chemie und Makromolekulare Chemie, Heinrich-Heine-

Universität Düsseldorf, Universitätsstr. 1, D-40225 Düsseldorf, Germany.

ThomasJJ.Mueller@uni-duesseldorf.de

## Table of Contents

|                                                                                                         |    |
|---------------------------------------------------------------------------------------------------------|----|
| General considerations .....                                                                            | 3  |
| Spectroscopic Data of 5-(3-lindolyl)oxazoles 4 .....                                                    | 4  |
| 4-(4-Chlorophenyl)-2-methyl-5-(2- <i>p</i> -tolyl-1 <i>H</i> -indol-3-yl)oxazole (4a) .....             | 4  |
| 4-(4-Chlorophenyl)-5-(2-(4-chlorophenyl)-1 <i>H</i> -indol-3-yl)-2-methyloxazole (4b).....              | 7  |
| 4-(4-Chlorophenyl)-2-methyl-5-(2-phenyl-1 <i>H</i> -indol-3-yl)oxazole (4c) .....                       | 9  |
| 2-Methyl-4- <i>p</i> -tolyl-5-(2- <i>p</i> -tolyl-1 <i>H</i> -indol-3-yl)oxazole (4d) .....             | 11 |
| 5-(2-(4-Chlorophenyl)-1 <i>H</i> -indol-3-yl)-2-methyl-4- <i>p</i> -tolylloxazole (4e) .....            | 13 |
| 2-Methyl-5-(2-phenyl-1 <i>H</i> -indol-3-yl)-4- <i>p</i> -tolylloxazole (4f) .....                      | 15 |
| 4-(4-Chlorophenyl)-5-(2-(3-chlorophenyl)-1 <i>H</i> -indol-3-yl)-2-methyloxazole (4g).....              | 17 |
| 4-(4-Chlorophenyl)-5-(2-(4-chlorophenyl)-5-methyl-1 <i>H</i> -indol-3-yl)-2-methyloxazole (4h)<br>..... | 19 |
| 5-(2-(4-Chlorophenyl)-5-methyl-1 <i>H</i> -indol-3-yl)-2-methyl-4- <i>p</i> -tolylloxazole (4i) .....   | 21 |
| 4-(4-Chlorophenyl)-2-methyl-5-(5-methyl-2- <i>p</i> -tolyl-1 <i>H</i> -indol-3-yl)oxazole (4j) .....    | 23 |
| 2-Methyl-5-(5-methyl-2- <i>p</i> -tolyl-1 <i>H</i> -indol-3-yl)-4- <i>p</i> -tolylloxazole (4k) .....   | 25 |
| 4-(4-Chlorophenyl)-2-methyl-5-(5-methyl-2-phenyl-1 <i>H</i> -indol-3-yl)oxazole (4l) .....              | 27 |
| 2-Methyl-5-(5-methyl-2-phenyl-1 <i>H</i> -indol-3-yl)-4- <i>p</i> -tolylloxazole (4m) .....             | 29 |
| 4-(4-Chlorophenyl)-2-methyl-5-(5-methyl-2-(thiophen-2-yl)-1 <i>H</i> -indol-3-yl)oxazole (4n).31        |    |
| 4-(4-Chlorophenyl)-5-(2-(3-chlorophenyl)-5-methyl-1 <i>H</i> -indol-3-yl)-2-methyloxazole (4o)<br>..... | 33 |
| 2-Methyl-5-(5-methyl-2-(thiophen-2-yl)-1 <i>H</i> -indol-3-yl)-4- <i>p</i> -tolylloxazole (4p).....     | 35 |
| 5-(5-Chloro-2- <i>p</i> -tolyl-1 <i>H</i> -indol-3-yl)-2-methyl-4- <i>p</i> -tolylloxazole (4q).....    | 37 |
| 5-(5-Chloro-2-(thiophen-2-yl)-1 <i>H</i> -indol-3-yl)-4-(4-chlorophenyl)-2-methyloxazole (4r) ..        | 39 |
| 5-(5-Chloro-2-(4-chlorophenyl)-1 <i>H</i> -indol-3-yl)-4-(4-chlorophenyl)-2-methyloxazole (4s)<br>..... | 41 |
| 5-(5-Chloro-2-(4-chlorophenyl)-1 <i>H</i> -indol-3-yl)-2-methyl-4- <i>p</i> -tolylloxazol (4t).....     | 43 |
| (5-Chloro-2-(4-methoxyphenyl)-1 <i>H</i> -indol-3-yl)-2-methyl-4- <i>p</i> -tolylloxazole (4u).....     | 45 |
| 5-(5-Chloro-2-(furan-2-yl)-1 <i>H</i> -indol-3-yl)-4-(4-chlorophenyl)-2-methyloxazole (4v).....         | 47 |
| 5-(5-Chloro-2-(furan-2-yl)-1 <i>H</i> -indol-3-yl)-2-methyl-4- <i>p</i> -tolylloxazole (4w) .....       | 49 |
| 5-(5-Chloro-2-(3-chlorophenyl)-1 <i>H</i> -indol-3-yl)-4-(4-chlorophenyl)-2-methyloxazole (4x)<br>..... | 51 |
| 5-(5-Chloro-2-(3-chlorophenyl)-1 <i>H</i> -indol-3-yl)-2-methyl-4- <i>p</i> -tolylloxazole (4y).....    | 53 |
| Computed xyz-Coordinates of Compound 4x.....                                                            | 55 |
| Computed UV/vis Spectrum of Compound 4x by ZINDO-CI.....                                                | 57 |
| X-ray Structure Analysis of Compound 4x .....                                                           | 55 |

## General considerations

Tetrahydrofuran was dried using *MBraun* system MB-SPS-800, and triethylamine was refluxed under nitrogen over sodium, distilled and stored in a Schlenk flask over potassium hydroxide pellets under nitrogen atmosphere. Dielectric heating was performed with Discover Labmate microwave reactor by CEM (Kamp-Lintfort, Germany). Melting points were determined on a digital melting point apparatus and temperatures are uncorrected.  $^1\text{H}$  NMR,  $^{13}\text{C}$  NMR and 135-DEPT spectra were recorded on a Bruker Avance DRX500 spectrometer.  $\text{CDCl}_3$  and  $\text{DMSO-d}_6$  were used as deuterated solvents. The solvents were locked as internal standards ( $\text{CDCl}_3$ :  $^1\text{H}$   $\delta$  7.26,  $^{13}\text{C}$   $\delta$  77.16;  $\text{DMSO-d}_6$ :  $^1\text{H}$   $\delta$  2.50,  $^{13}\text{C}$   $\delta$  39.52). The multiplicities of signals were abbreviated as follows: s: singlet; d: doublet; t: triplet; dd: doublet of doublets; ddd: doublet of doublets of doublets; dt: doublet of triplets; td: triplet of doublets; tt: triplet of triplets; m: multiplet and br: broad signal. The type of carbon atoms was determined on the basis of 135-DEPT NMR spectra. Infrared spectra were recorded on a Vector 22 spectrophotometer (Bruker). The intensity of signals is abbreviated as follows: s (strong), m (medium) and w (weak). Flash column chromatography was performed on 60 M (mesh 230-400) silica gel (Merck or Macherey-Nagel). For thin-layer chromatography (TLC), silica gel plates (Merck; 60 F<sub>154</sub>) were used. The spots were detected with UV light at 254 nm and using aqueous potassium permanganate solution. Ultimate analysis was taken on a Perkin Elmer CHN-Analyzer 2400. Mass spectra were recorded by MALDI (Bruker Ultraflex). The UV/Vis Spectra were recorded on a Perkin Elmer Models Lambda 19 and the Emission spectra were recorded on a Perkin Elmer LS55 spectrometer.

## Spectroscopic Data of 5-(3-lindolyl)oxazoles 4

### 4-(4-Chlorophenyl)-2-methyl-5-(2-*p*-tolyl-1*H*-indol-3-yl)oxazole (4a)

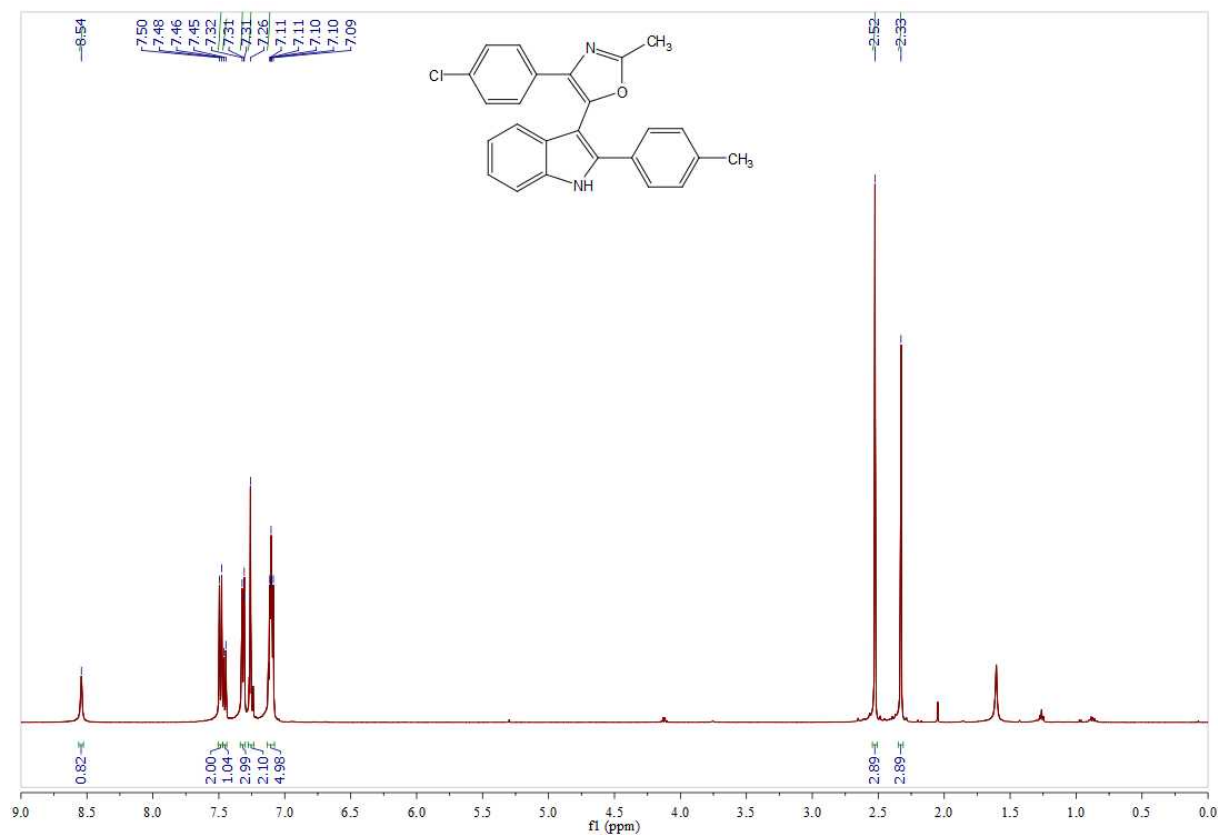

<sup>1</sup>H NMR of 4a in CDCl<sub>3</sub> at 296 K (δ in ppm).

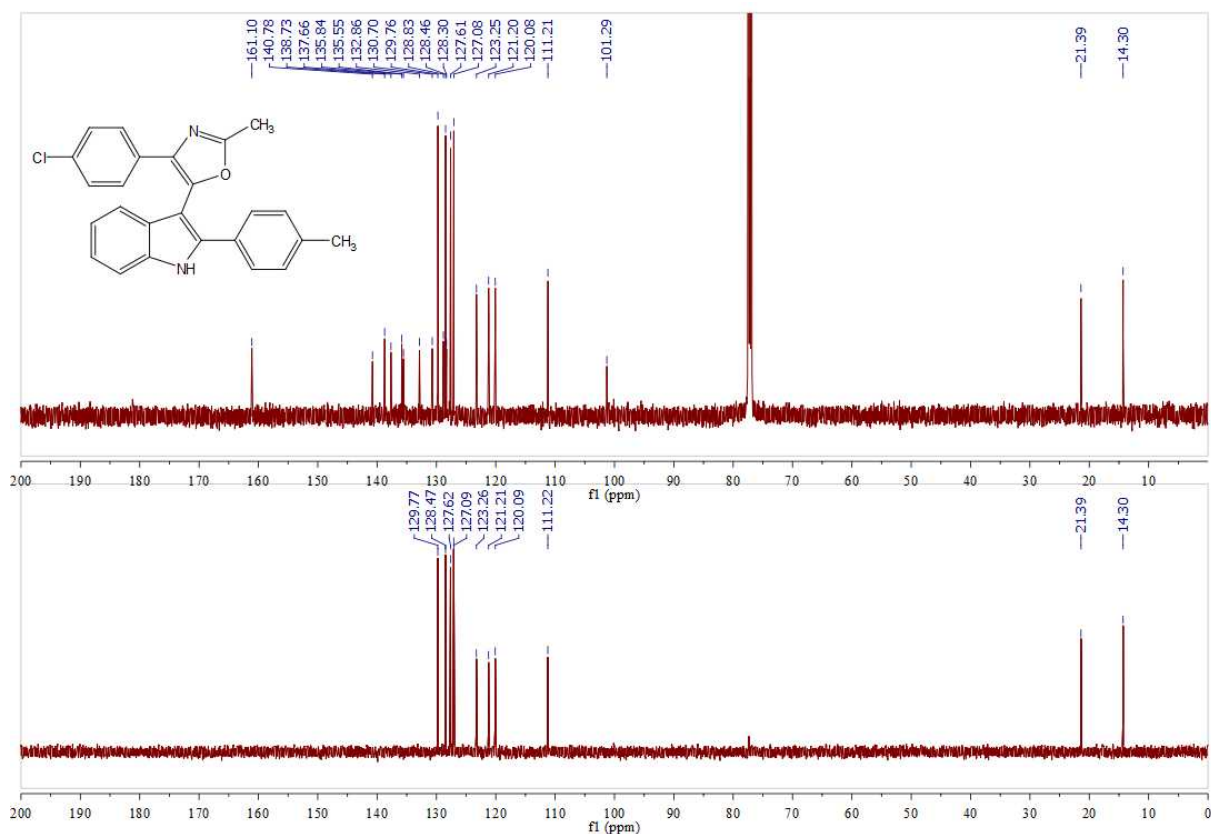

$^{13}\text{C}$  NMR and  $^{135}\text{-DEPT}$  Spectra of **4a** in  $\text{CDCl}_3$  at 296 K ( $\delta$  in ppm).

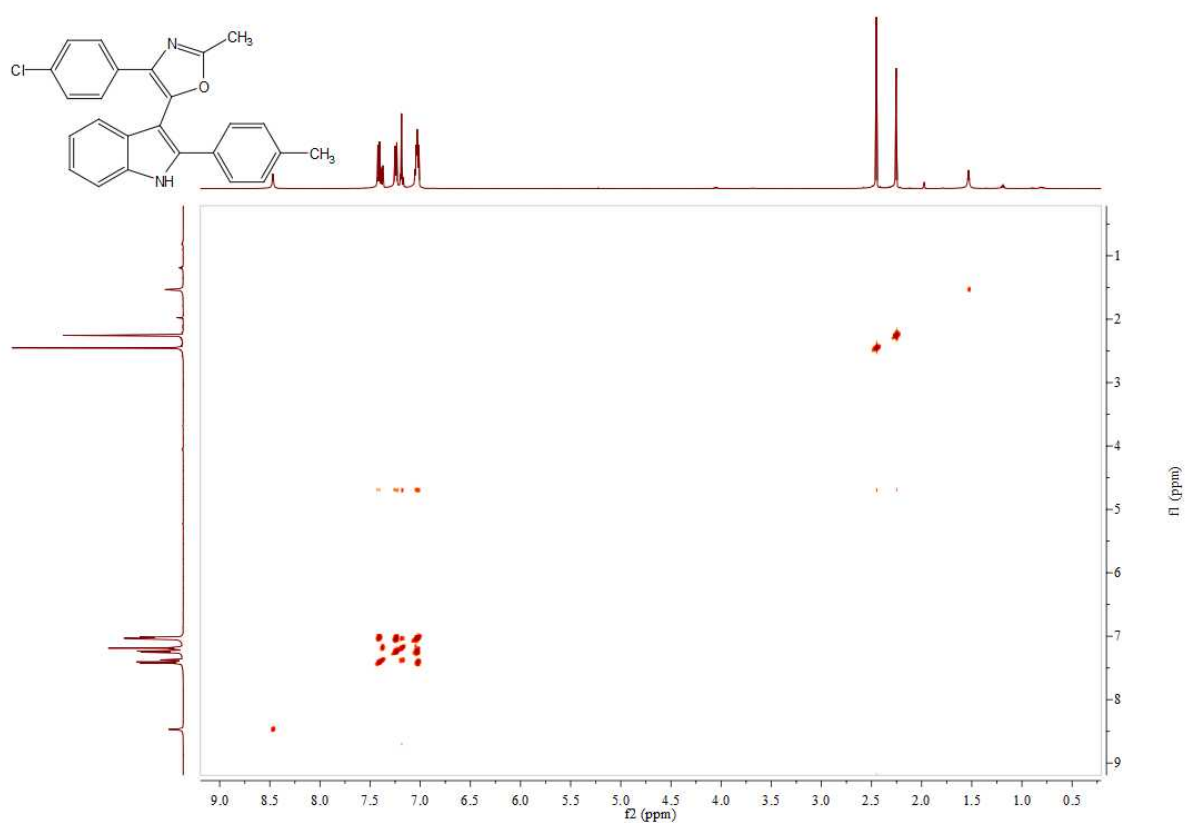

H,H-COSY NMR of **4a** in  $\text{CDCl}_3$  at 296 K ( $\delta$  in ppm).

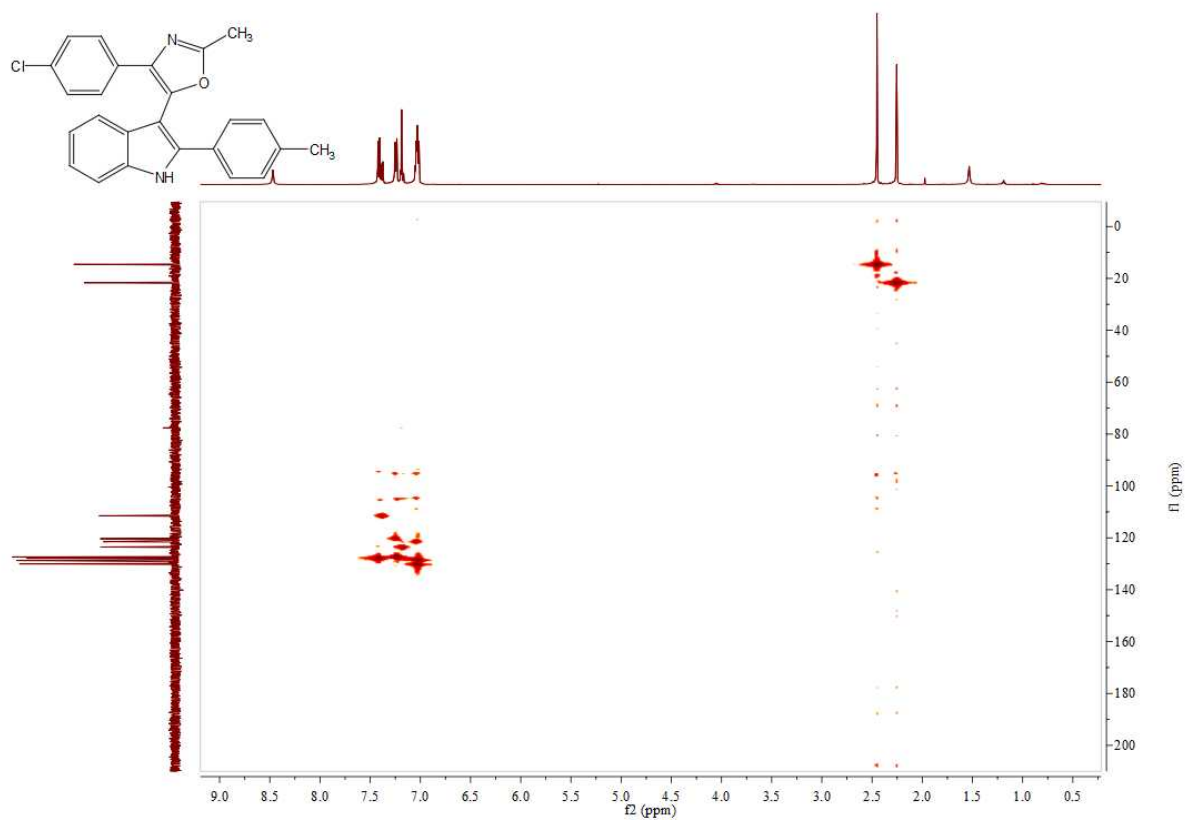

C,H-COSY NMR of **4a** in CDCl<sub>3</sub> at 296 K ( $\delta$  in ppm).

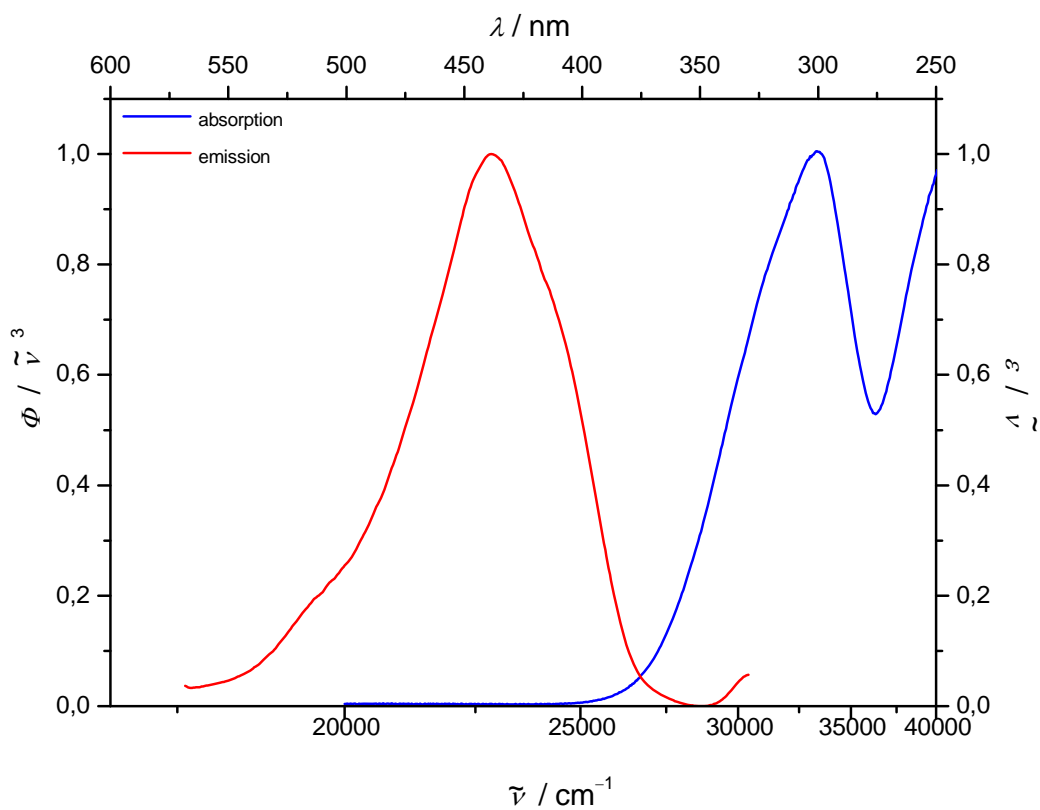

Normalized UV/Vis and fluorescence spectra of **4a** (recorded in EtOH at 298 K).

### 4-(4-Chlorophenyl)-5-(2-(4-chlorophenyl)-1H-indol-3-yl)-2-methyloxazole (4b)

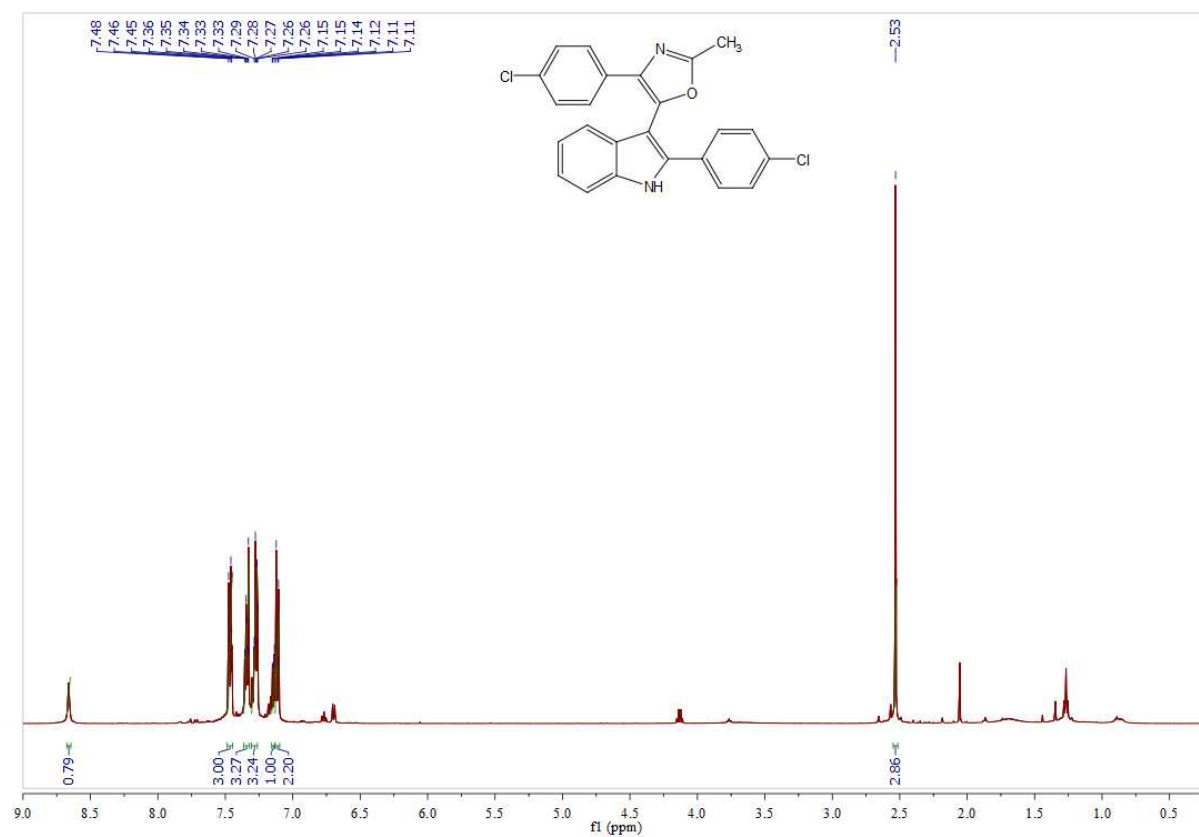

<sup>1</sup>H NMR of **4b** in CDCl<sub>3</sub> at 296 K (δ in ppm).

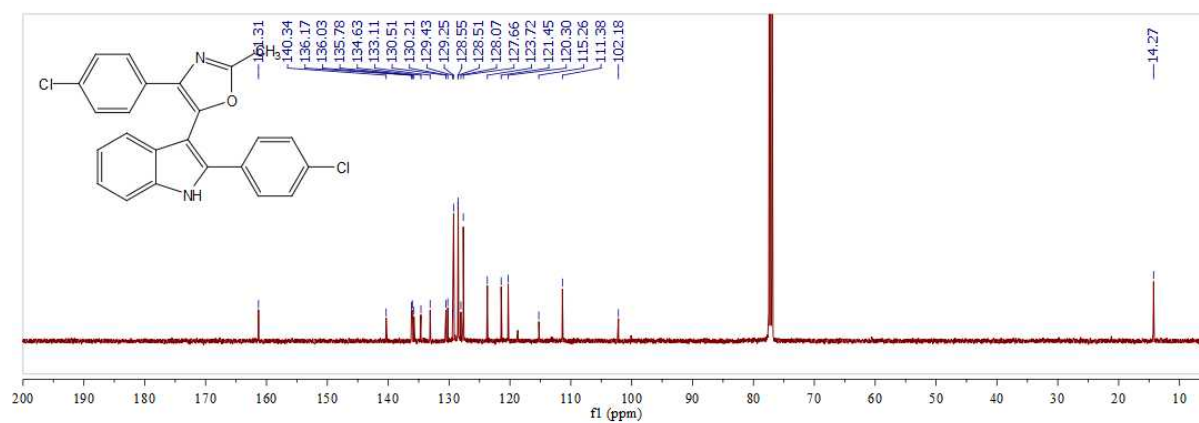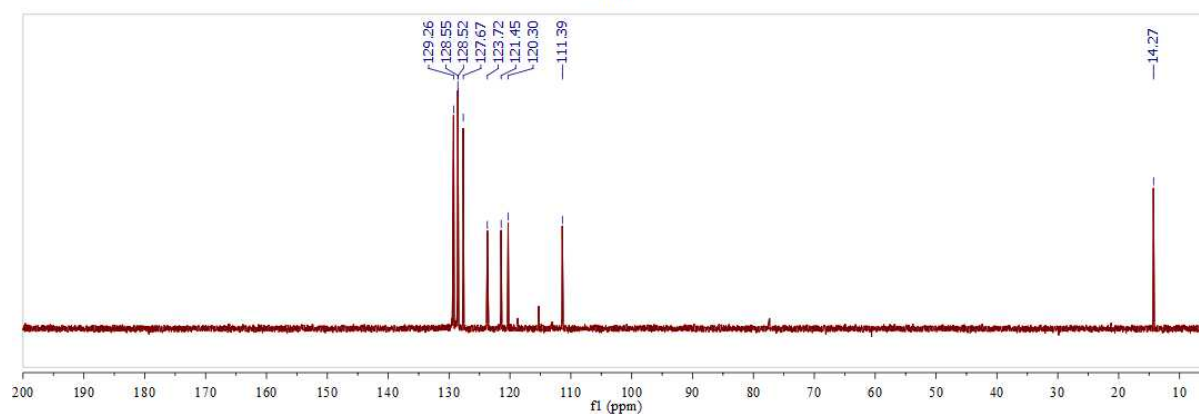

$^{13}\text{C}$  NMR and  $^{135}\text{-DEPT}$  Spectra of **4b** in  $\text{CDCl}_3$  at 296 K ( $\delta$  in ppm).

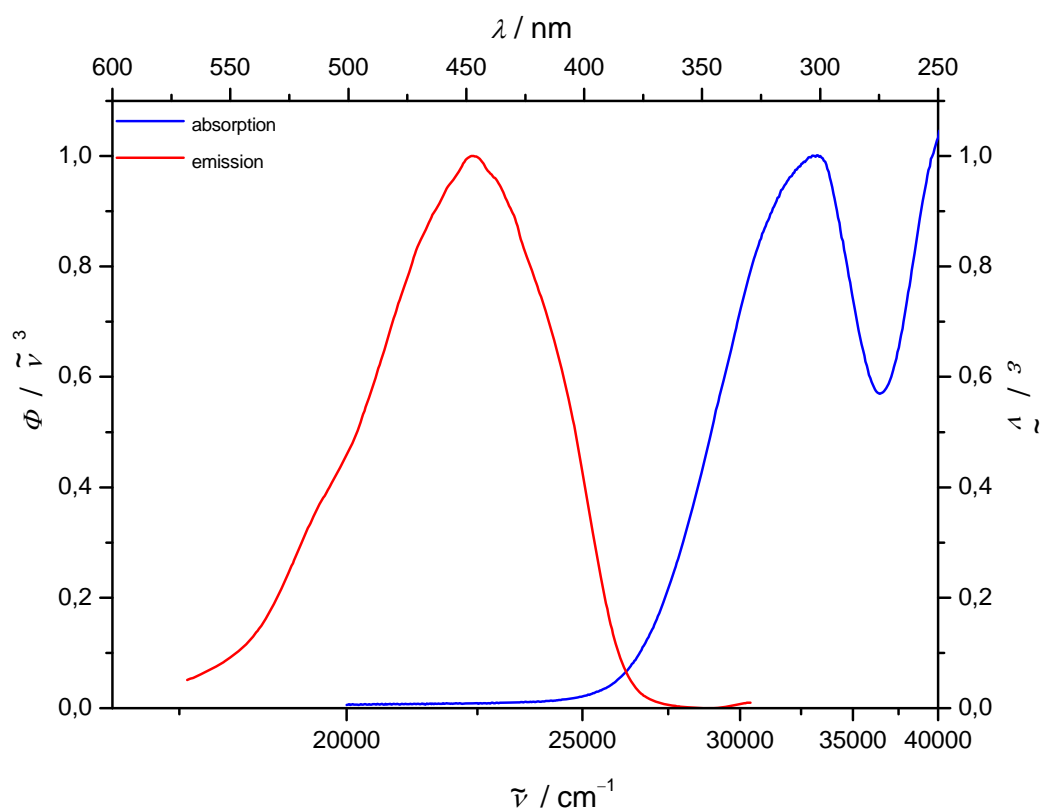

Normalized UV/Vis and fluorescence spectra of **4b** (recorded in EtOH at 298 K).



### 4-(4-Chlorophenyl)-2-methyl-5-(2-phenyl-1H-indol-3-yl)oxazole (4c)

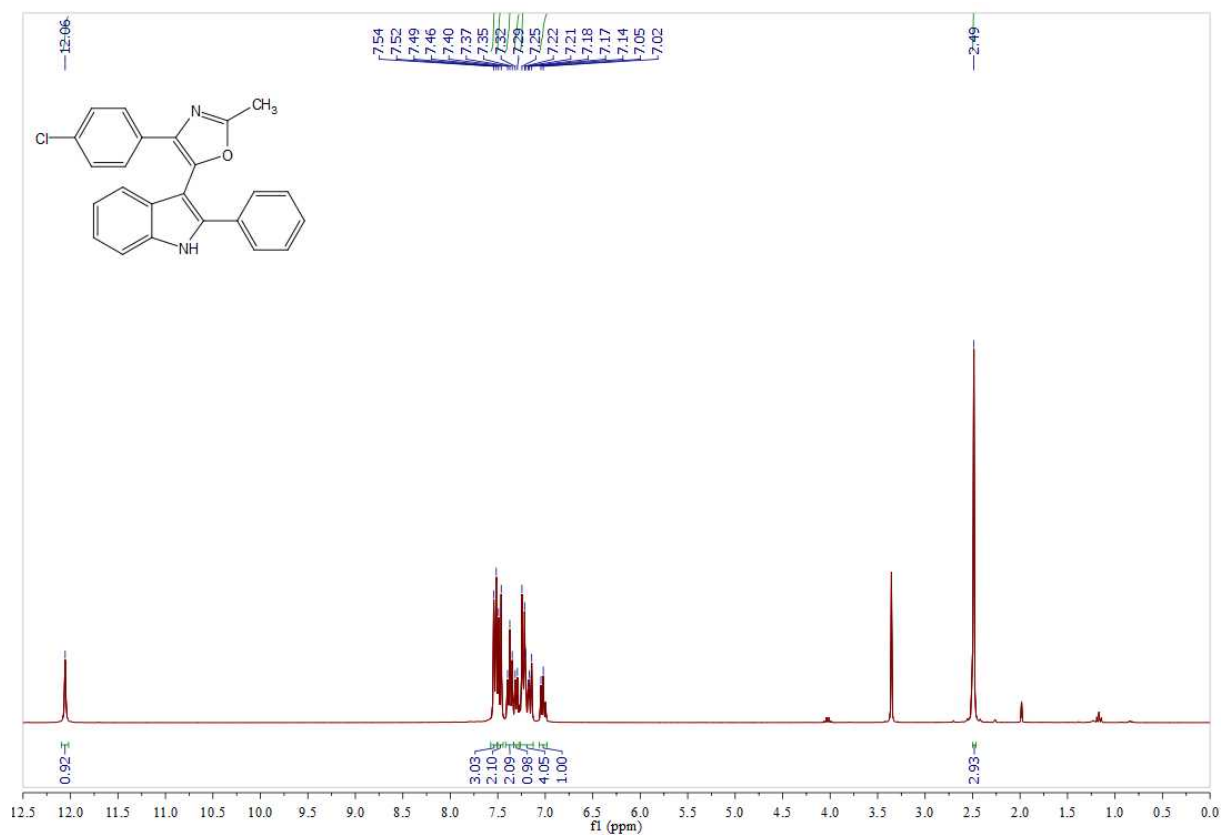

<sup>1</sup>H NMR of 4c in DMSO-d<sub>6</sub> at 296 K (δ in ppm).

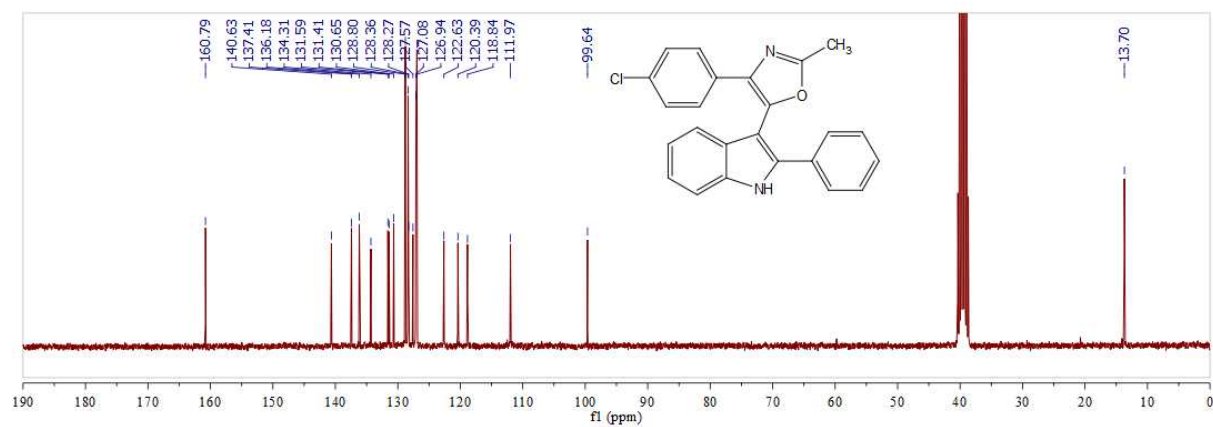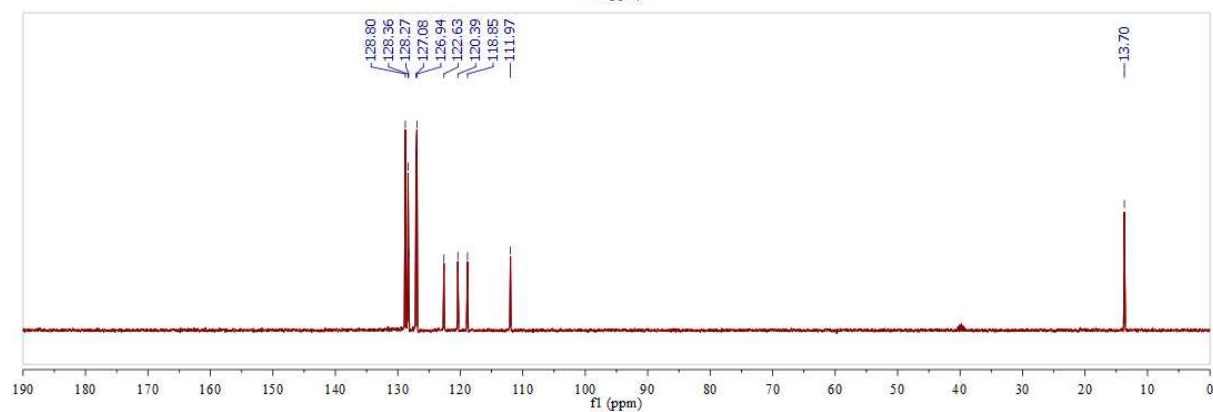

$^{13}\text{C}$  NMR and  $^{135}\text{-DEPT}$  Spectra of **4c** in  $\text{DMSO-d}_6$  at 296 K ( $\delta$  in ppm).

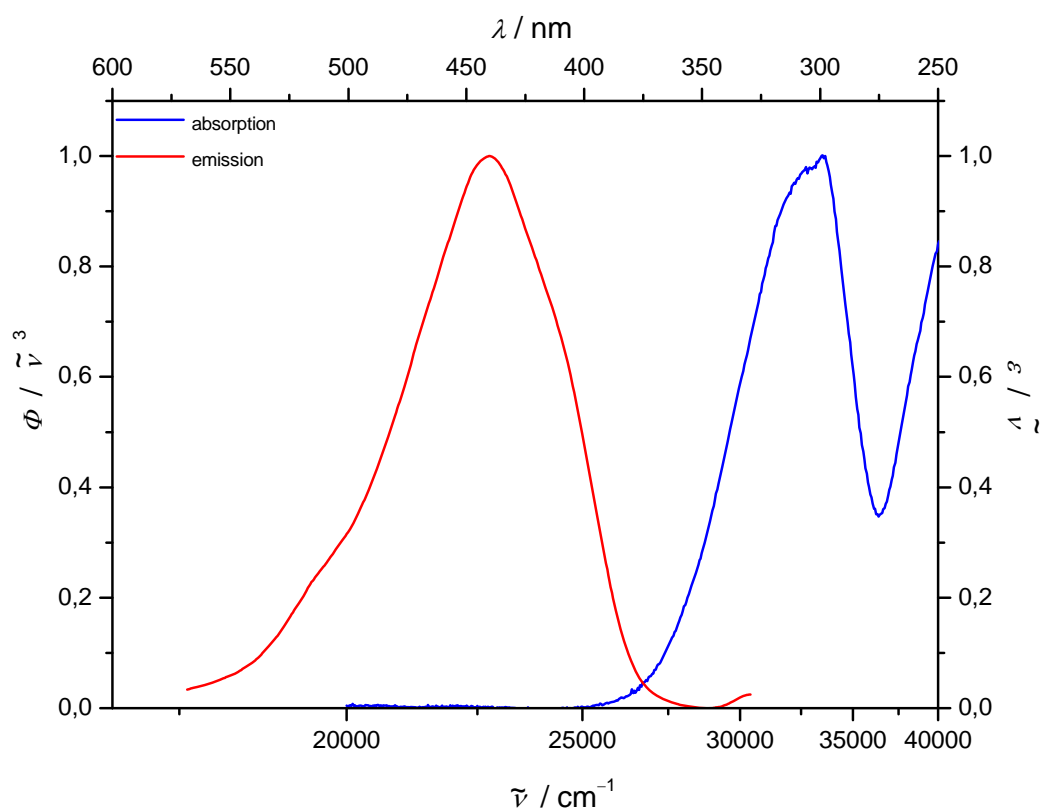

Normalized UV/Vis and fluorescence spectra of **4c** (recorded in EtOH at 298 K).

### 2-Methyl-4-*p*-tolyl-5-(2-*p*-tolyl-1*H*-indol-3-yl)oxazole (4d)

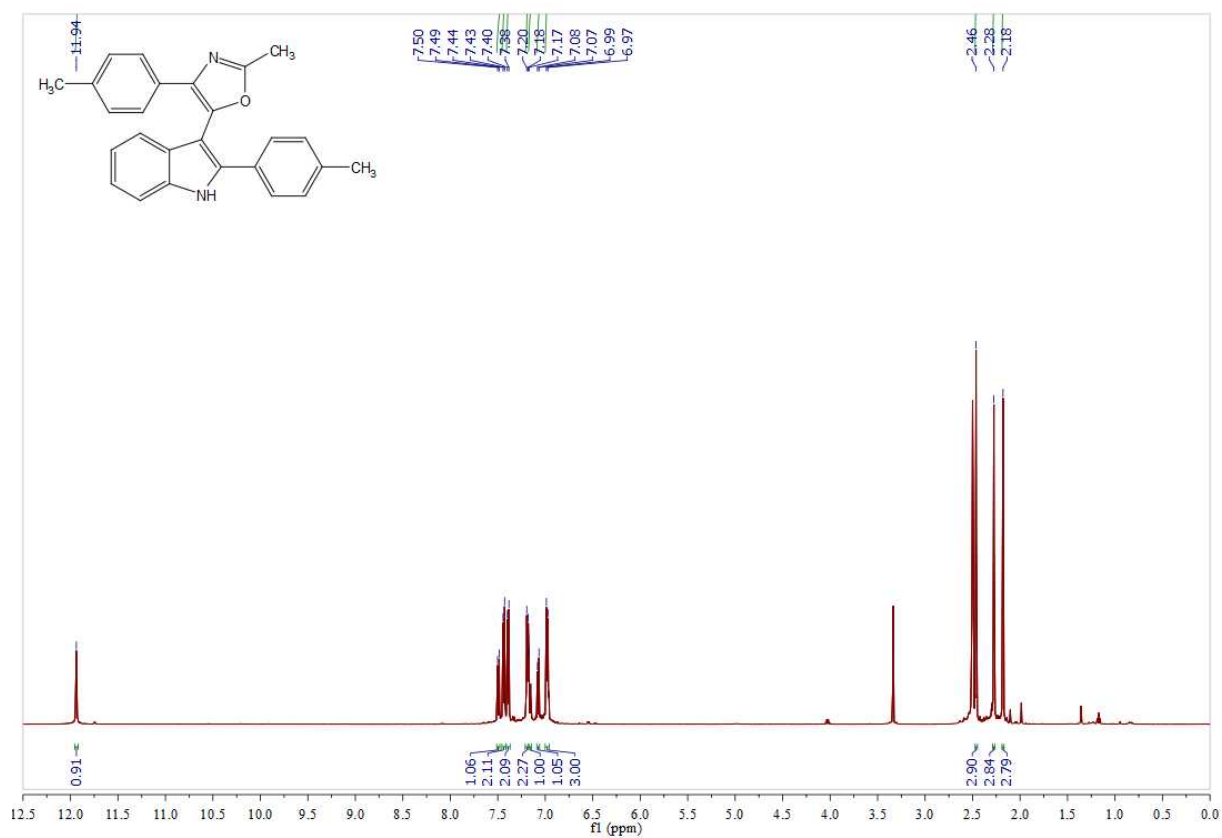

<sup>1</sup>H NMR of **4d** in DMSO-d<sub>6</sub> at 296 K ( $\delta$  in ppm).

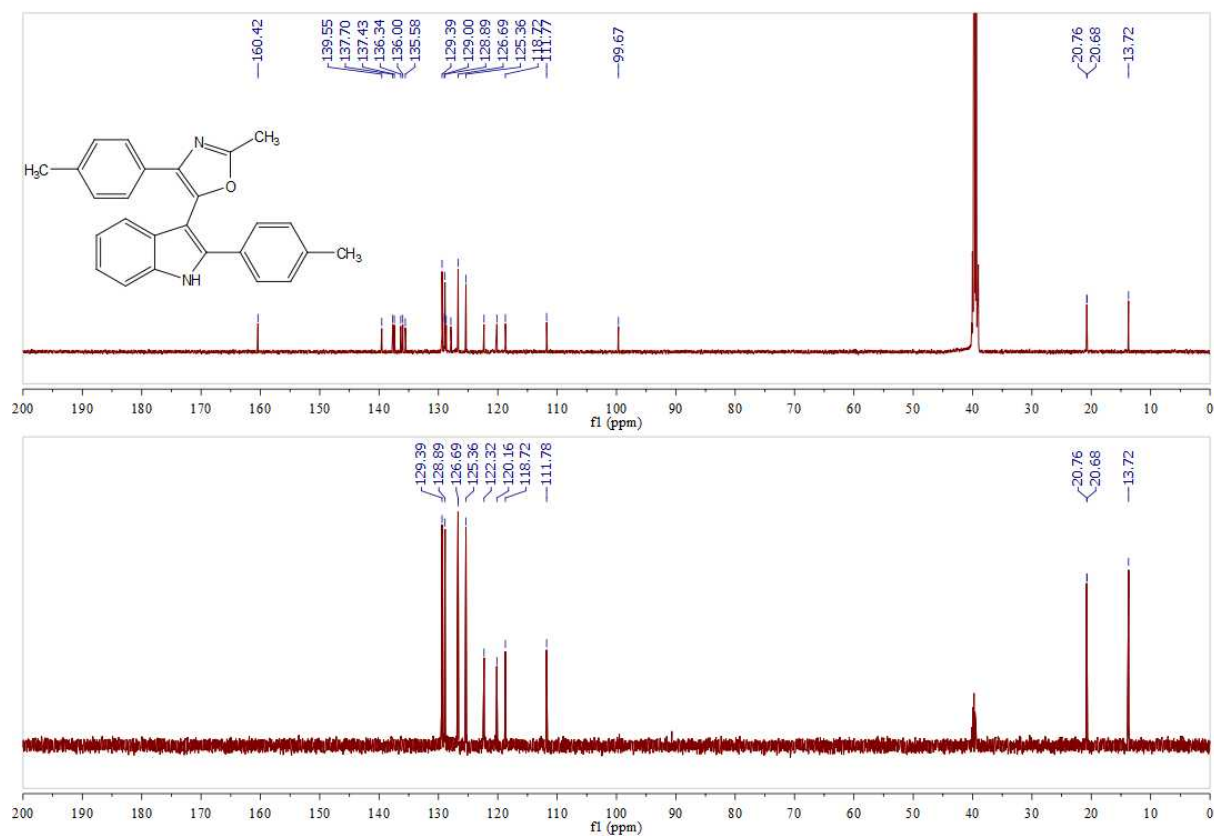

$^{13}\text{C}$  NMR and  $^{135}\text{-DEPT}$  Spectra of **4d** in  $\text{DMSO-d}_6$  at 296 K ( $\delta$  in ppm).

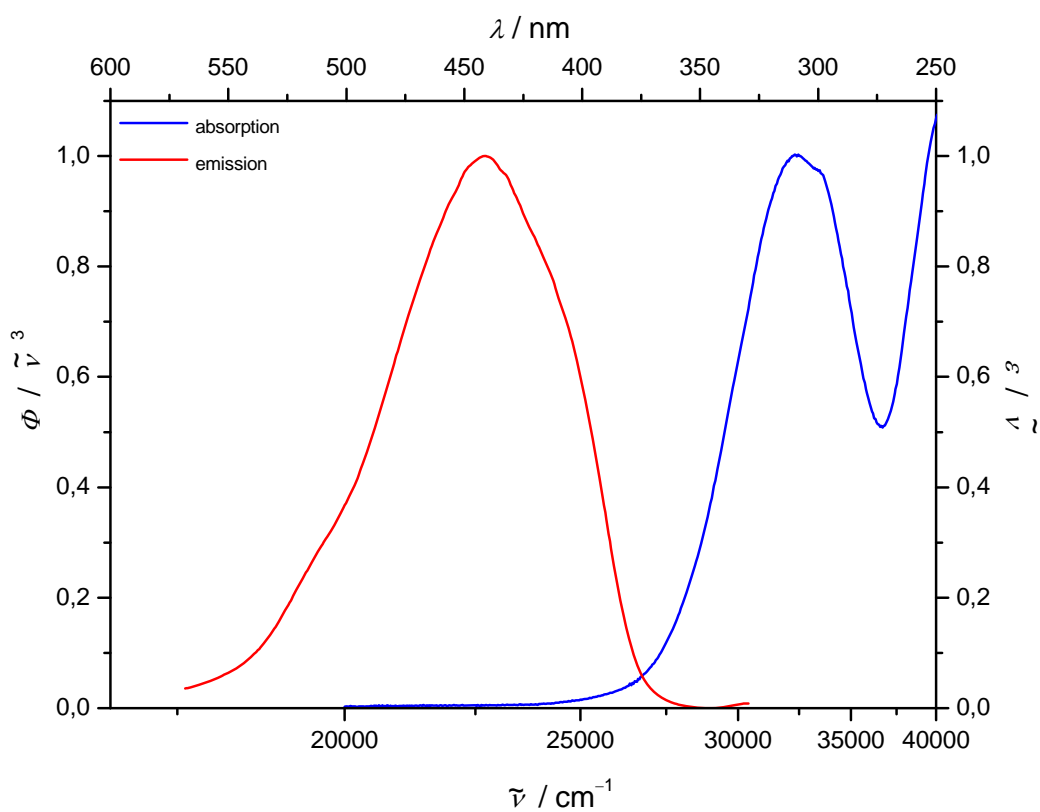

Normalized UV/Vis and fluorescence spectra of **4d** (recorded in EtOH at 298 K).

### 5-(2-(4-Chlorophenyl)-1*H*-indol-3-yl)-2-methyl-4-*p*-tolylloxazole (4e)

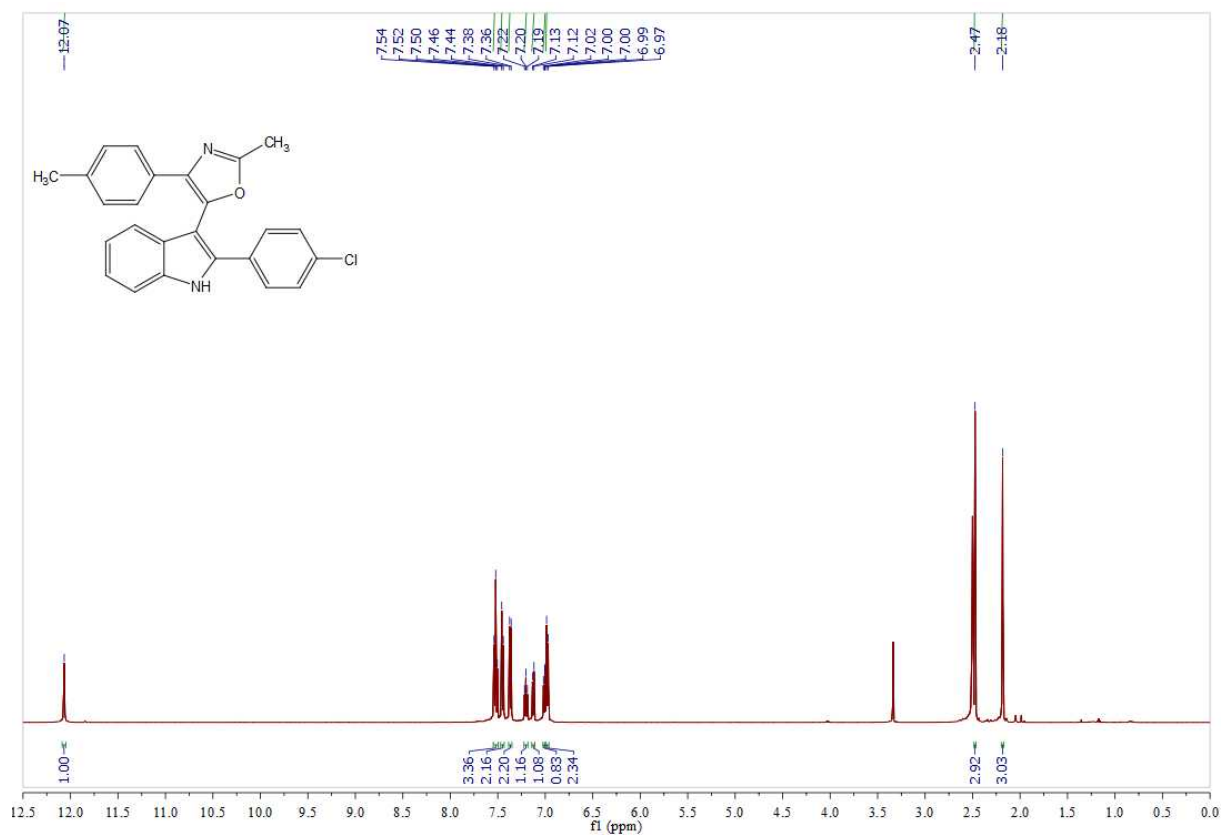

<sup>1</sup>H NMR of **4e** in DMSO-d<sub>6</sub> at 296 K ( $\delta$  in ppm).

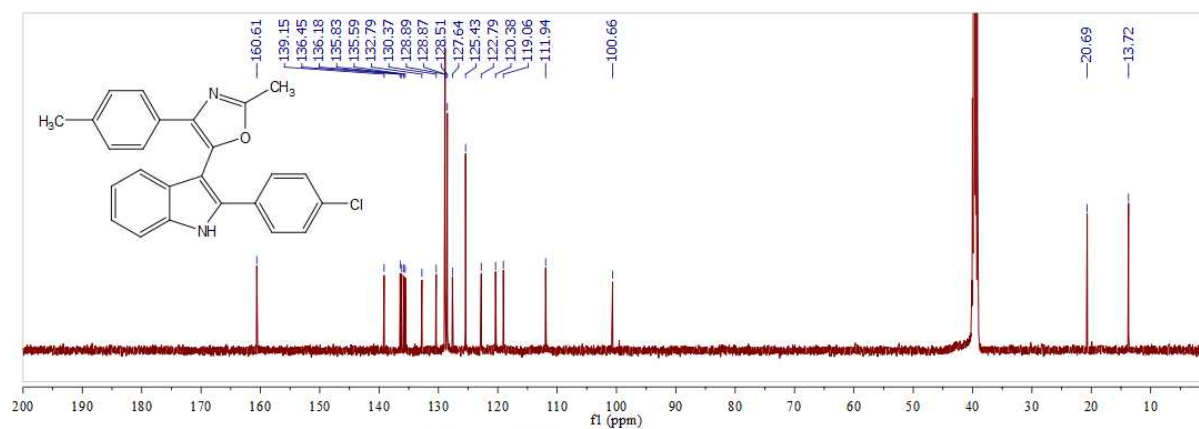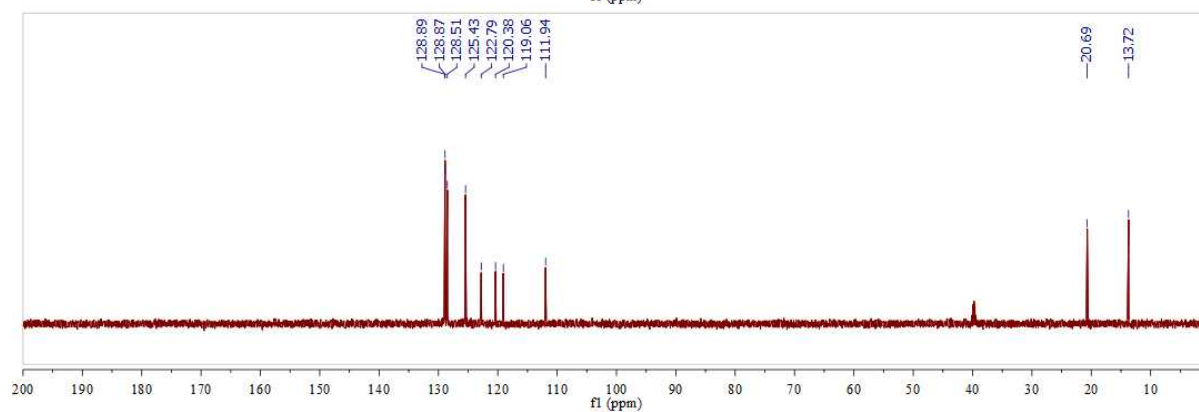

$^{13}\text{C}$  NMR and  $^{135}\text{-DEPT}$  Spectra of **4e** in  $\text{DMSO-d}_6$  at 296 K ( $\delta$  in ppm).

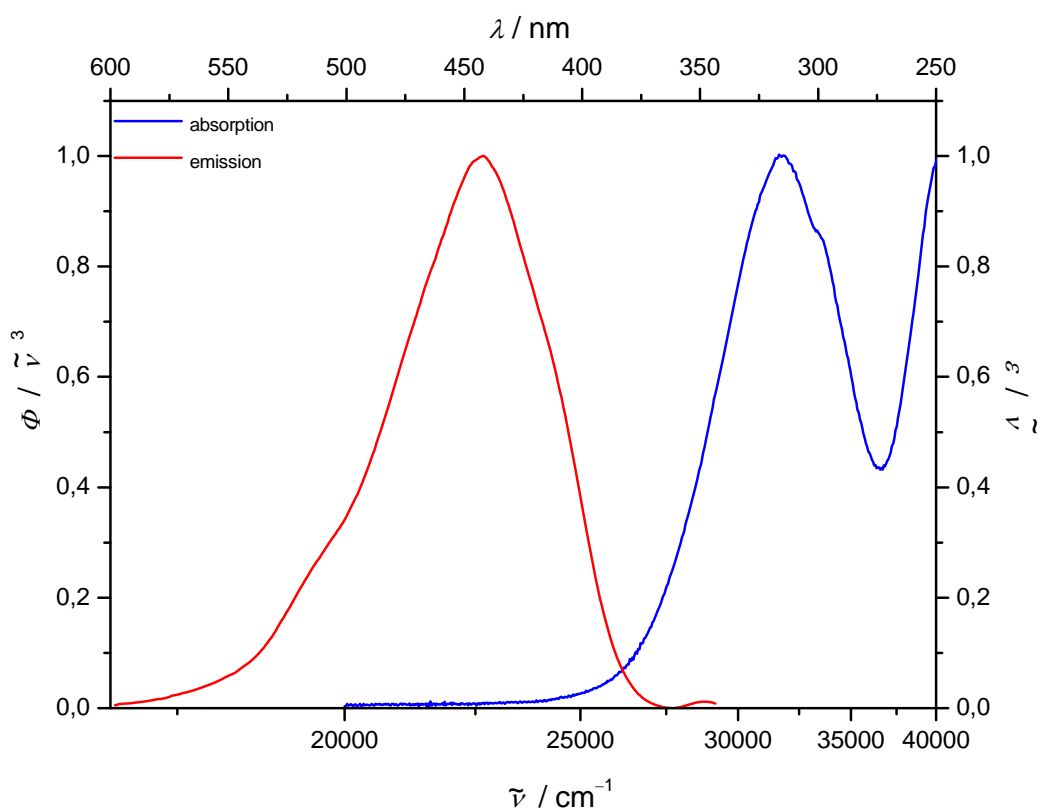

Normalized UV/Vis and fluorescence spectra of **4e** (recorded in EtOH at 298 K).

## 2-Methyl-5-(2-phenyl-1H-indol-3-yl)-4-p-tolylloxazole (4f)

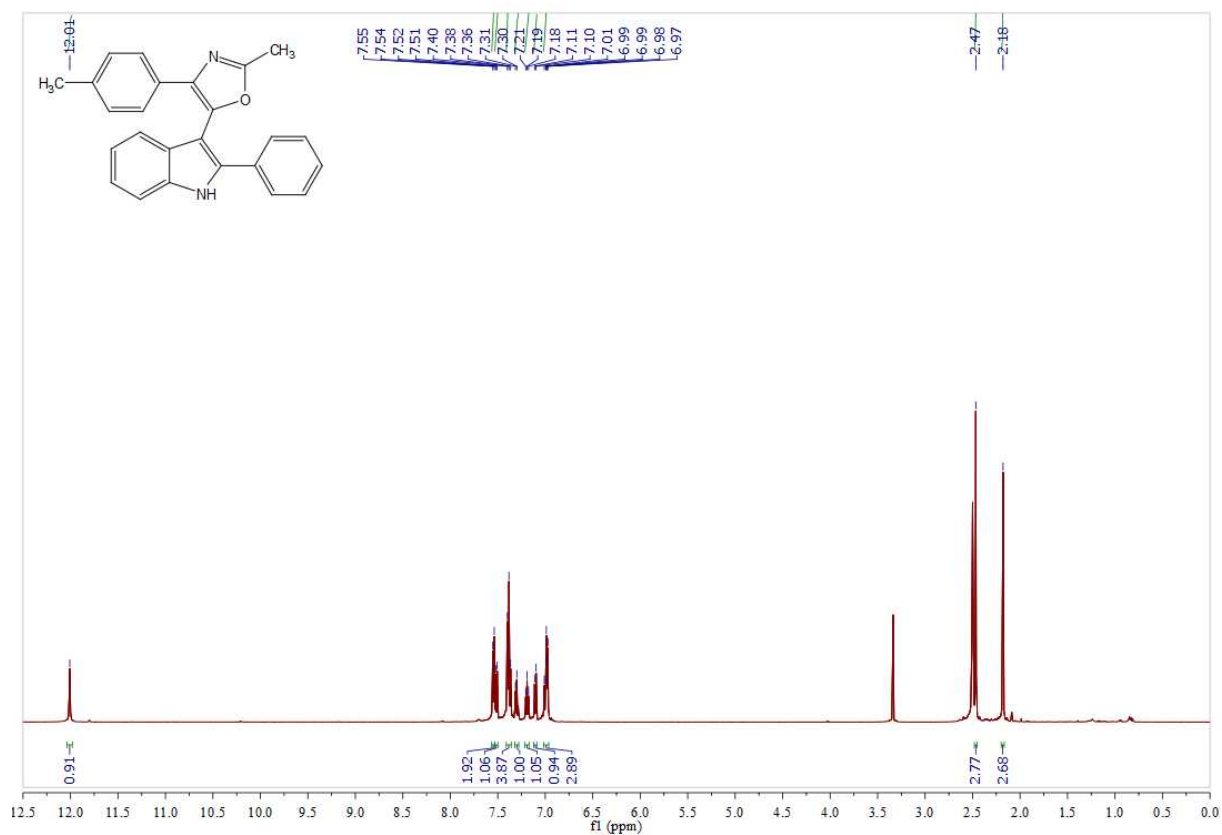

<sup>1</sup>H NMR of **4f** in DMSO-d<sub>6</sub> at 296 K ( $\delta$  in ppm).

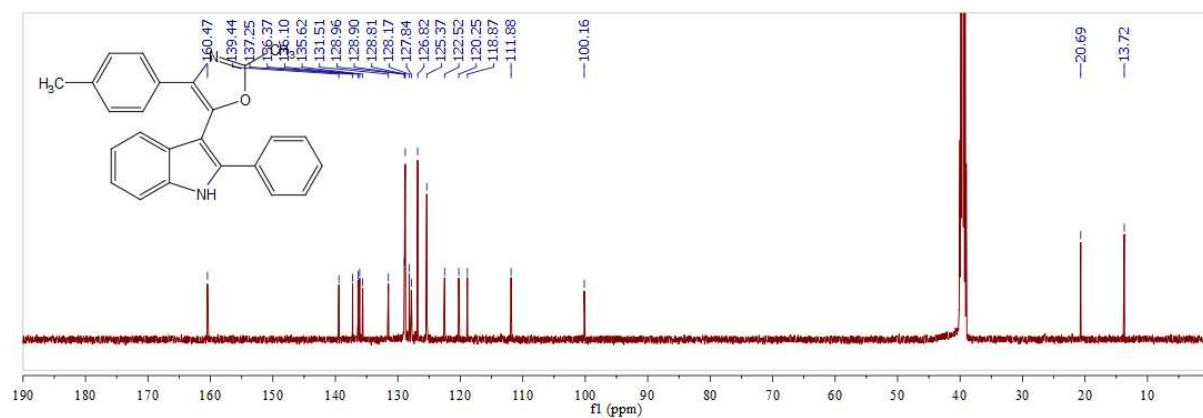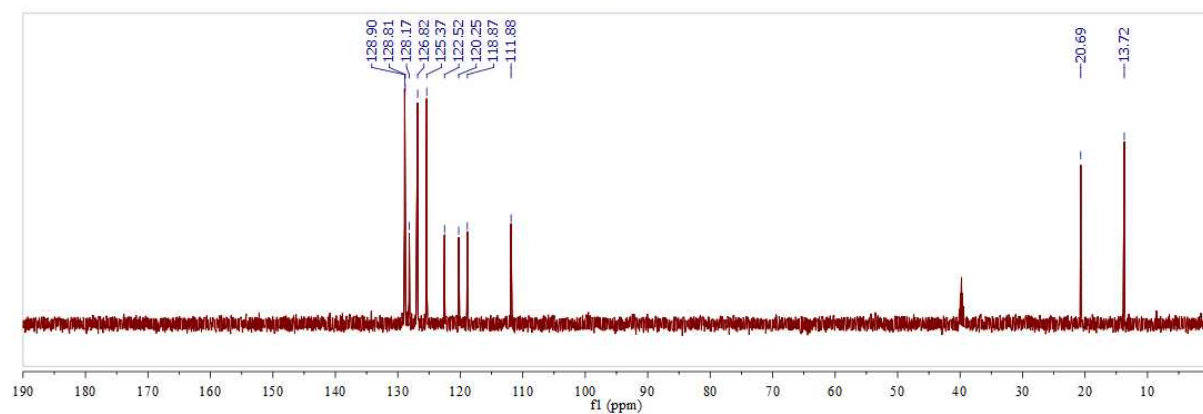

$^{13}\text{C}$  NMR and  $^{135}\text{DEPT}$  Spectra of **4f** in  $\text{DMSO-d}_6$  at 296 K ( $\delta$  in ppm).

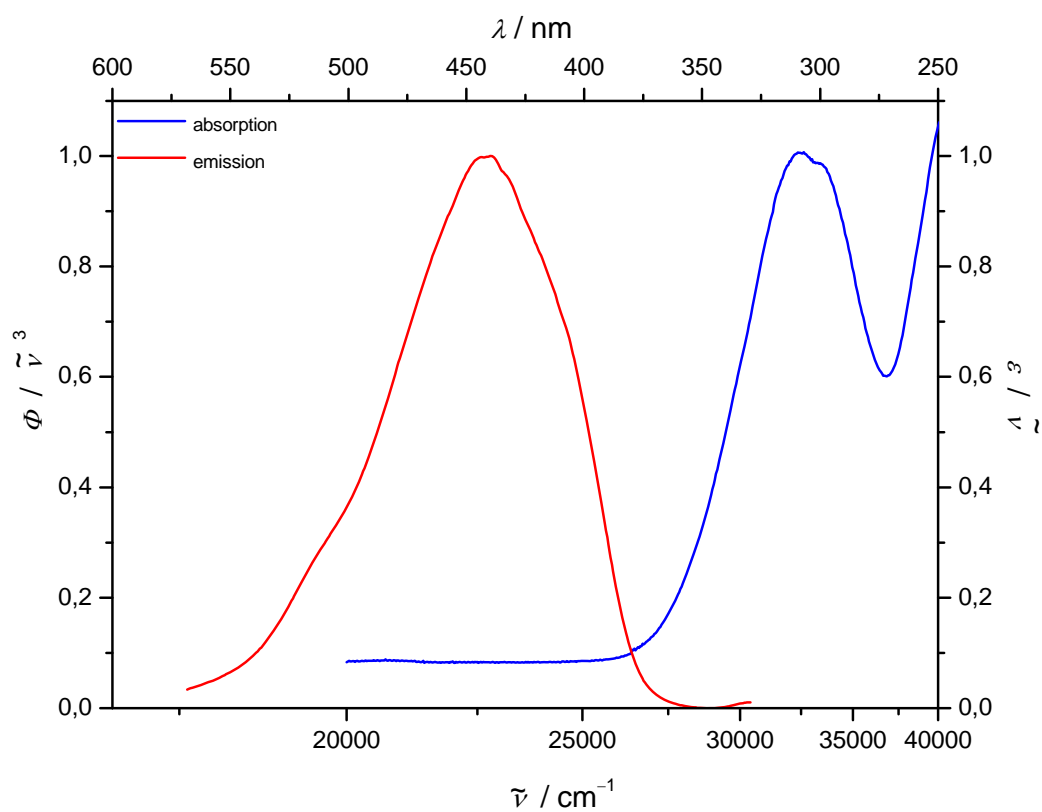

Normalized UV/Vis and fluorescence spectra of **4f** (recorded in EtOH at 298 K).



### 4-(4-Chlorophenyl)-5-(2-(3-chlorophenyl)-1H-indol-3-yl)-2-methyloxazole (4g)

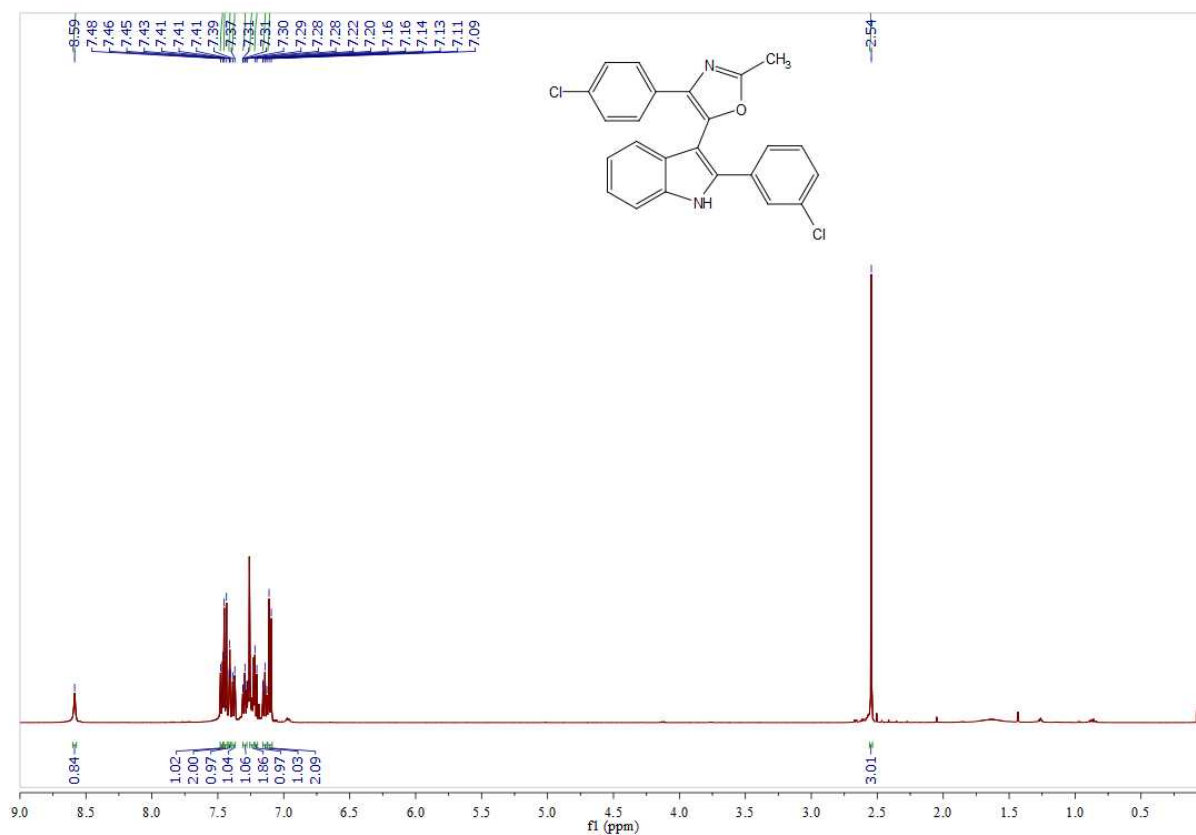

**<sup>1</sup>H NMR of 4g in CDCl<sub>3</sub> at 296 K (δ in ppm).**

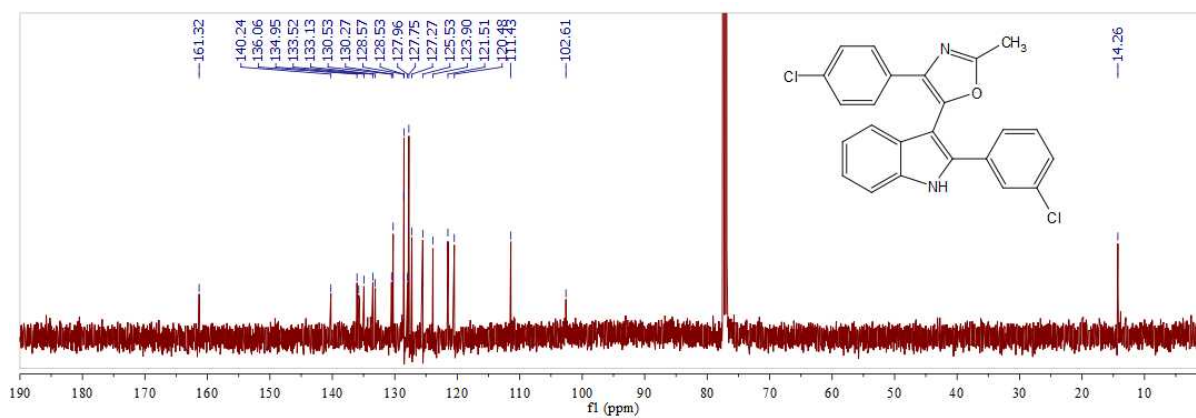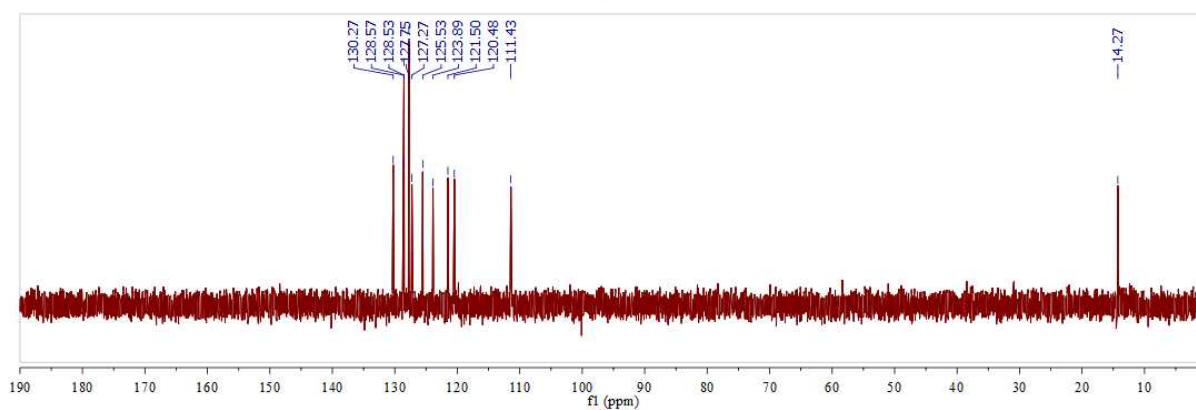

$^{13}\text{C}$  NMR and  $^{135}\text{-DEPT}$  Spectra of **4g** in  $\text{CDCl}_3$  at 296 K ( $\delta$  in ppm).

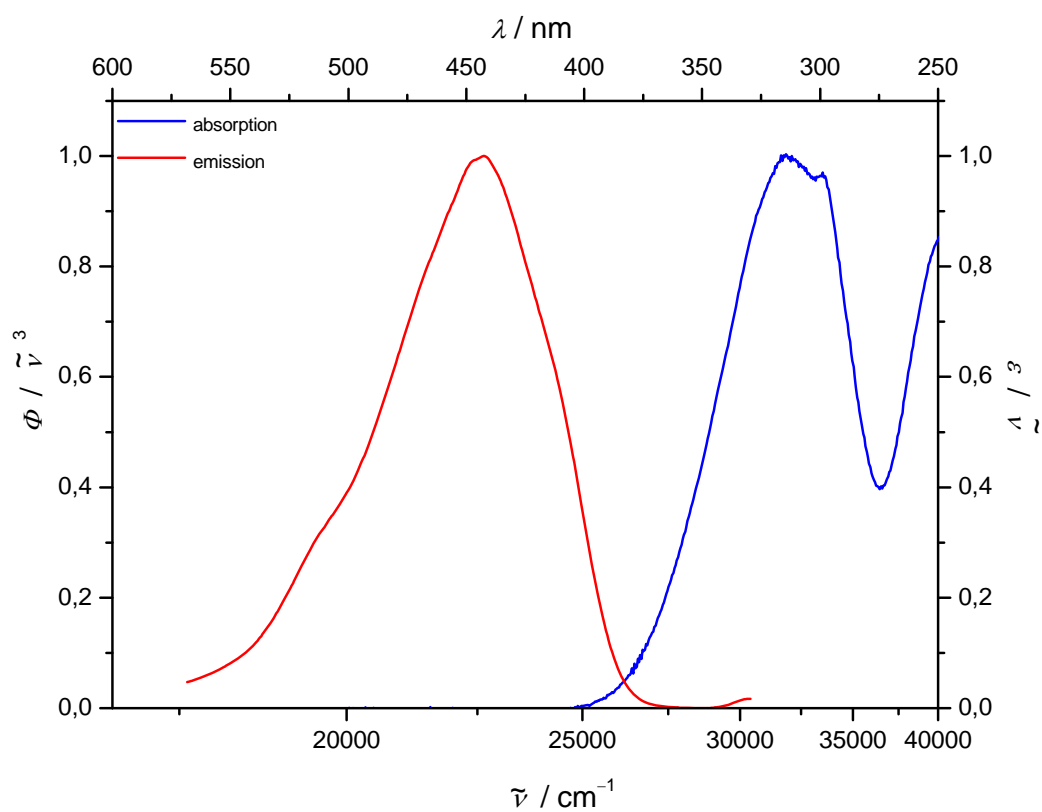

Normalized UV/Vis and fluorescence spectra of **4g** (recorded in EtOH at 298 K).

### 4-(4-Chlorophenyl)-5-(2-(4-chlorophenyl)-5-methyl-1H-indol-3-yl)-2-methyloxazole (4h)

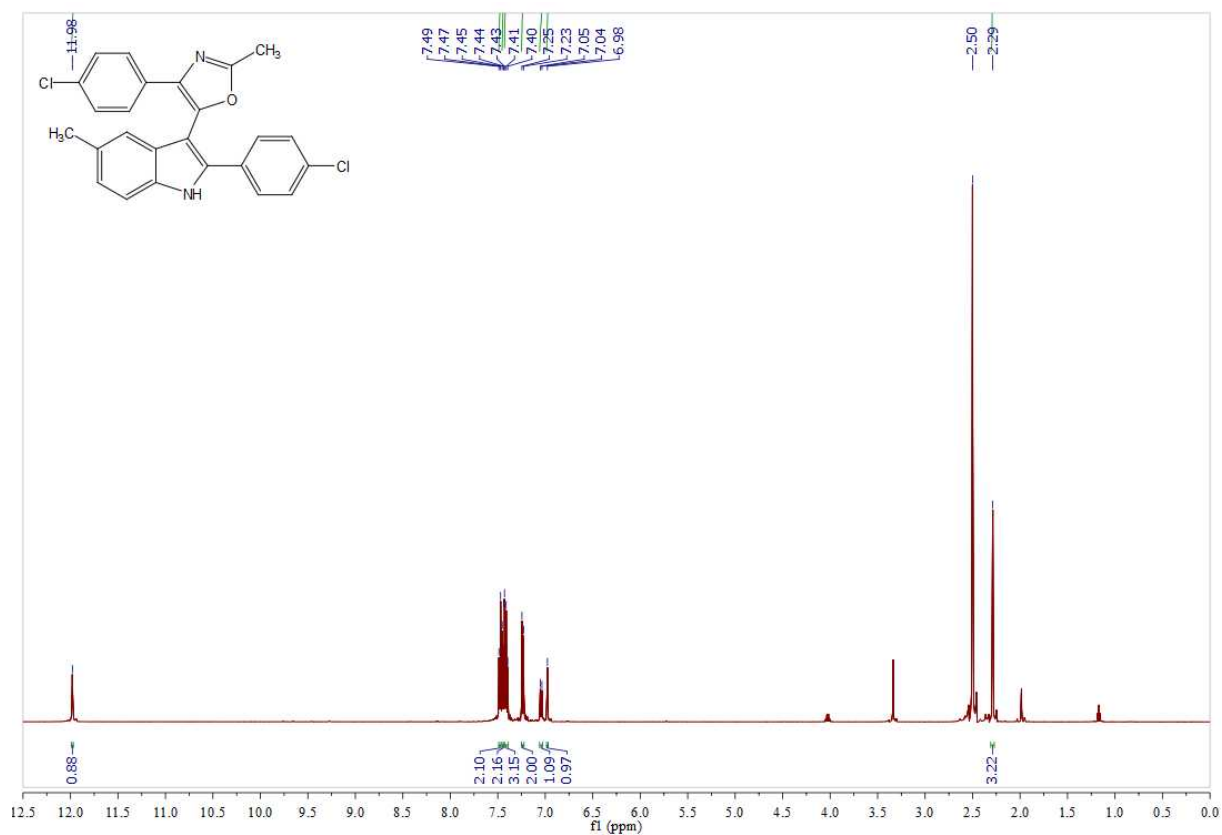

<sup>1</sup>H NMR of 4h in DMSO-d<sub>6</sub> at 296 K (δ in ppm).

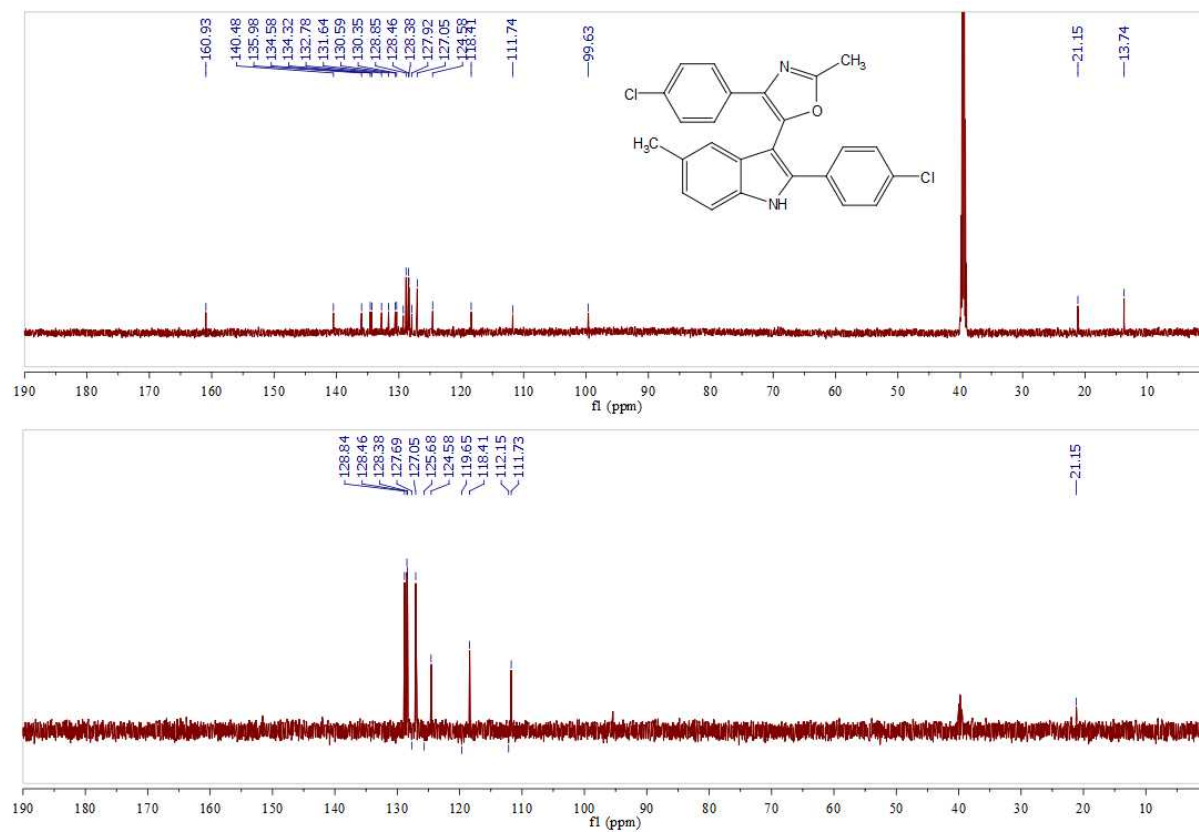

$^{13}\text{C}$  NMR and  $^{135}\text{-DEPT}$  Spectra of **4h** in  $\text{DMSO-d}_6$  at 296 K ( $\delta$  in ppm).

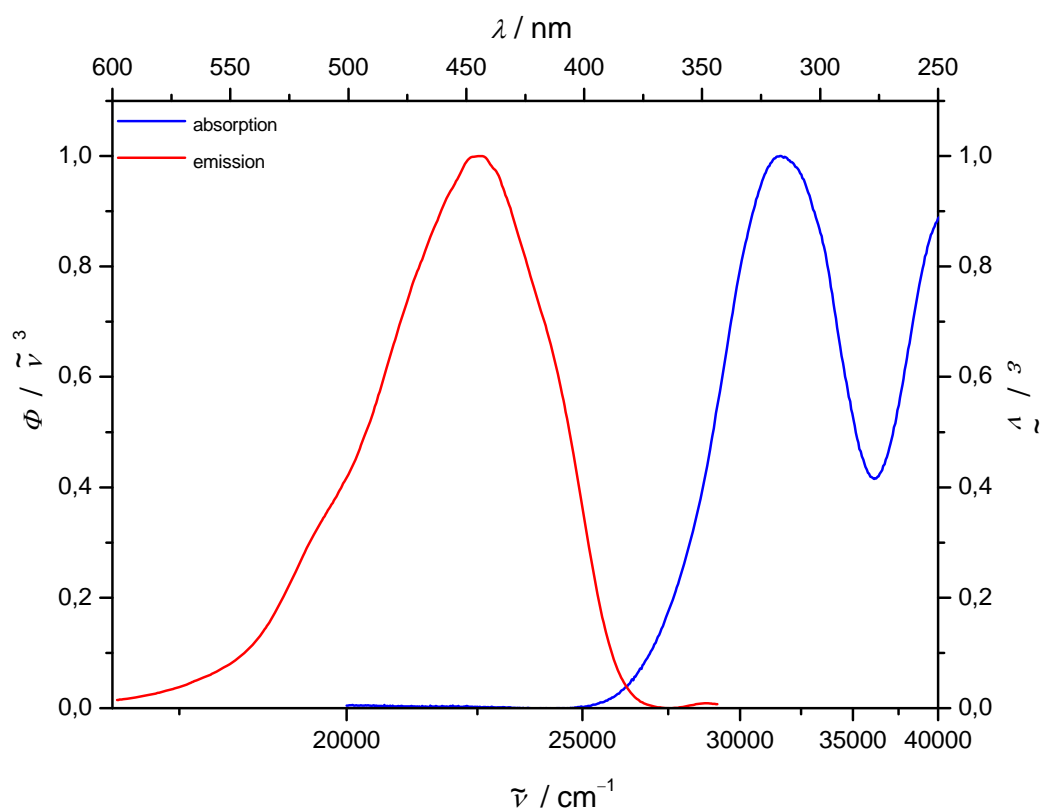

Normalized UV/Vis and fluorescence spectra of **4h** (recorded in EtOH at 298 K).

### 5-(2-(4-Chlorophenyl)-5-methyl-1*H*-indol-3-yl)-2-methyl-4-*p*-tolylloxazole (4i)

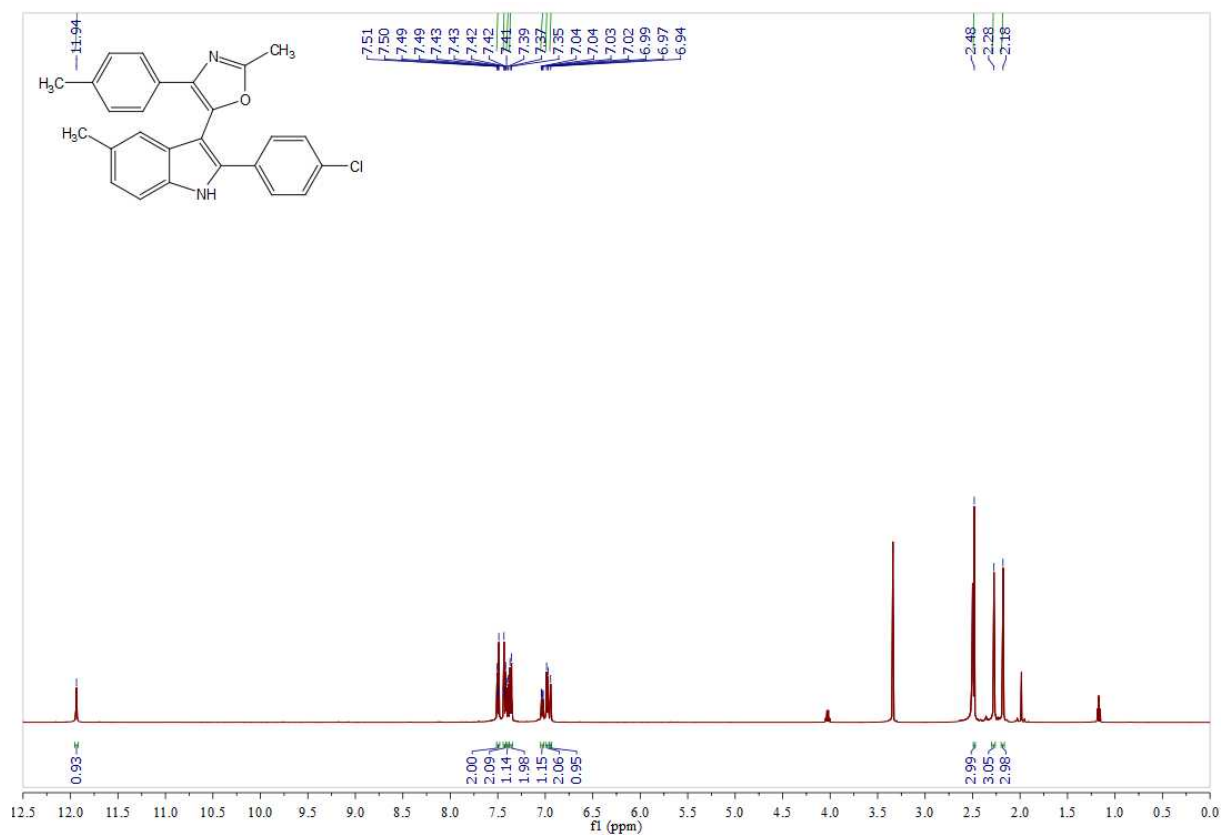

<sup>1</sup>H NMR of **4i** in DMSO-d<sub>6</sub> at 296 K ( $\delta$  in ppm).

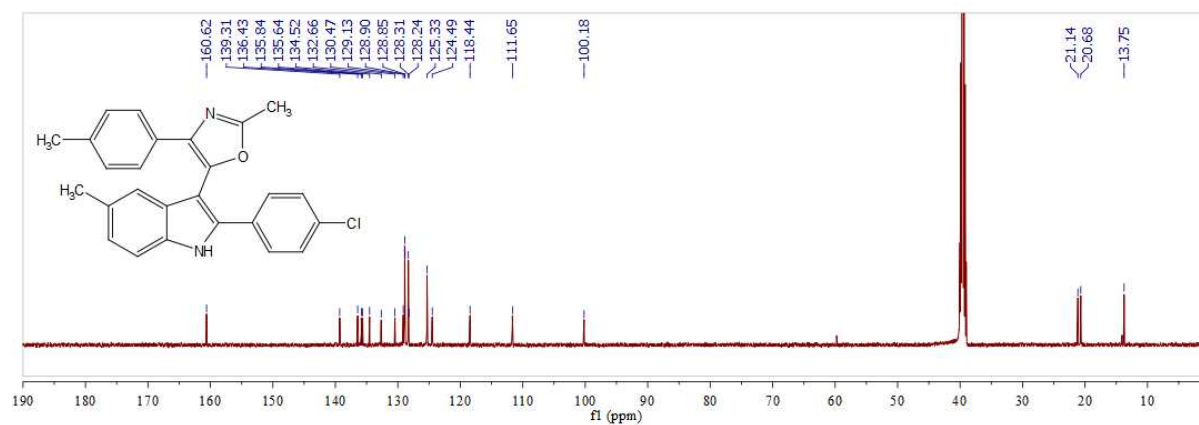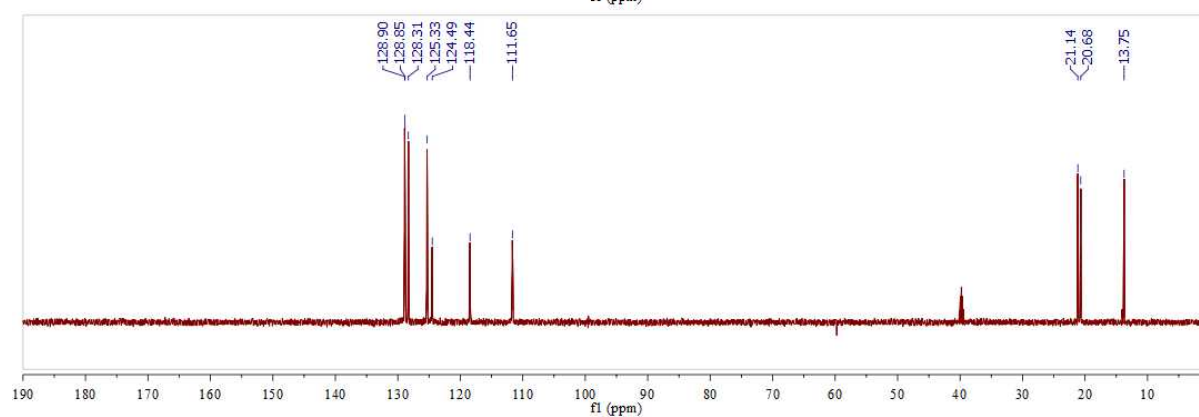

$^{13}\text{C}$  NMR and  $^{135}\text{-DEPT}$  Spectra of **4i** in  $\text{DMSO-d}^6$  at 296 K ( $\delta$  in ppm).

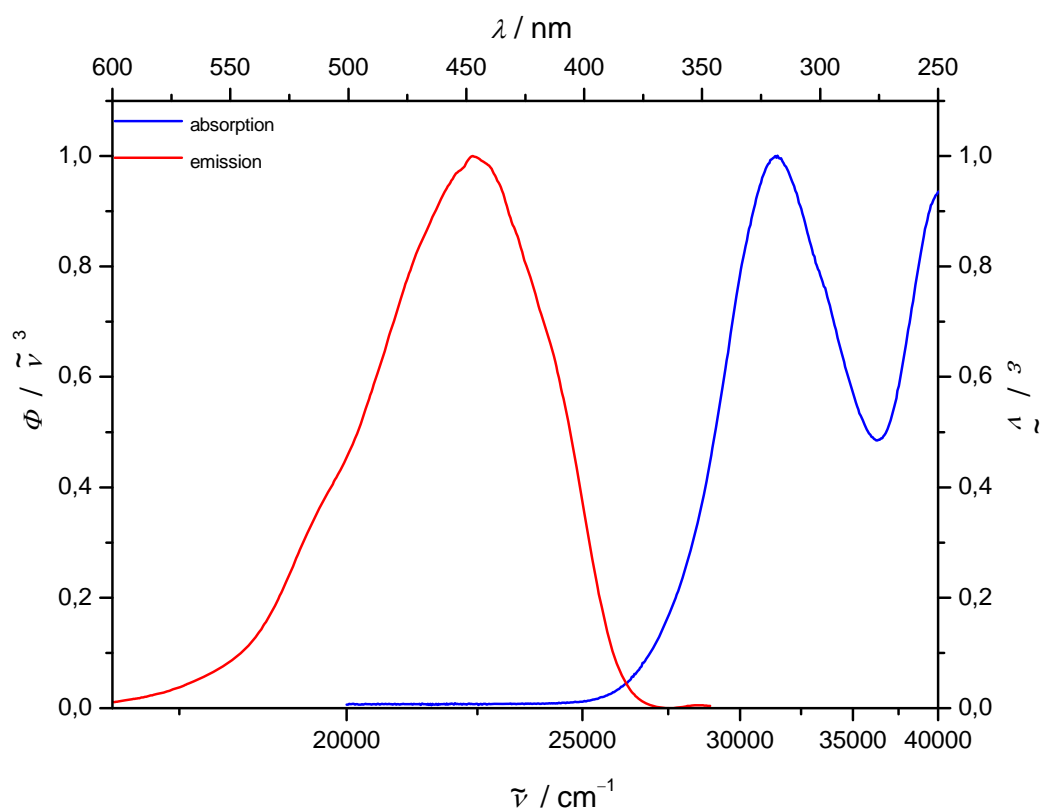

Normalized UV/Vis and fluorescence spectra of **4i** (recorded in EtOH at 298 K).

#### 4-(4-Chlorophenyl)-2-methyl-5-(5-methyl-2-*p*-tolyl-1*H*-indol-3-yl)oxazole (4j)

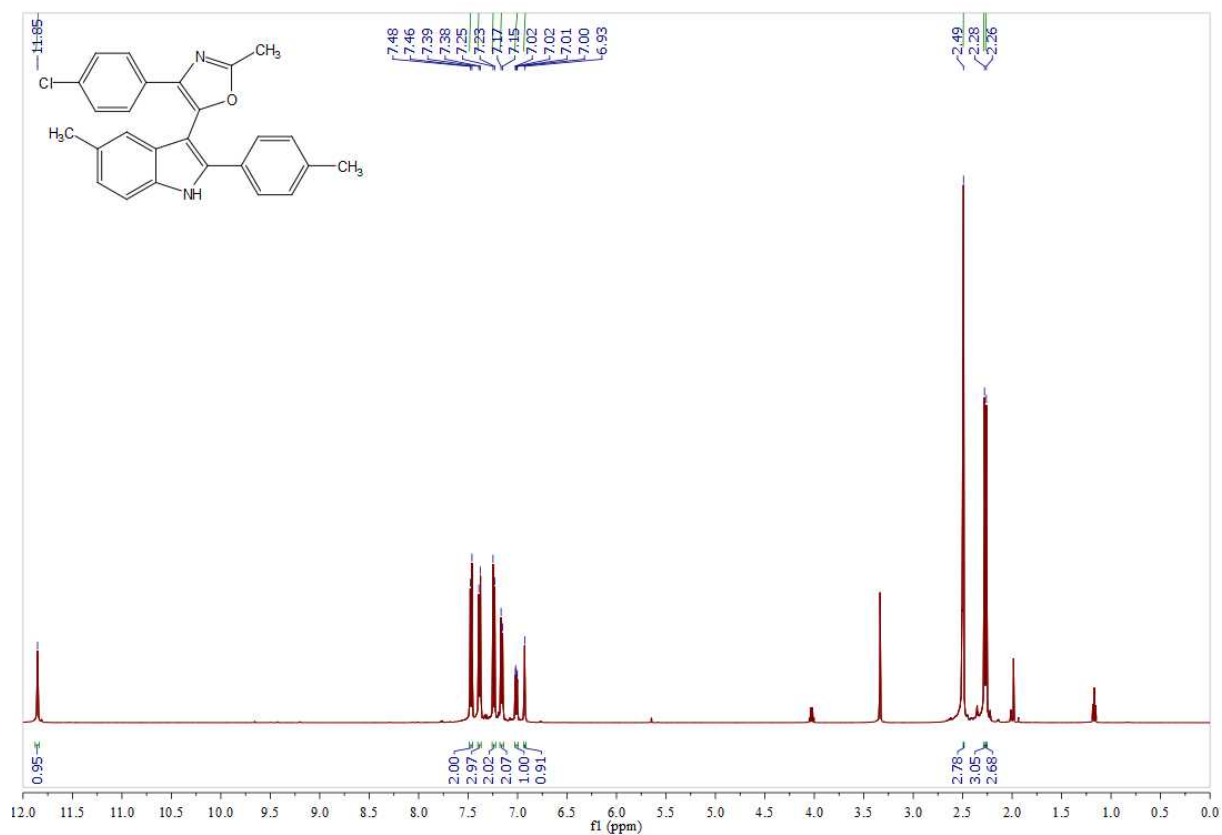

<sup>1</sup>H NMR of 4j in DMSO-d<sub>6</sub> at 296 K (δ in ppm).

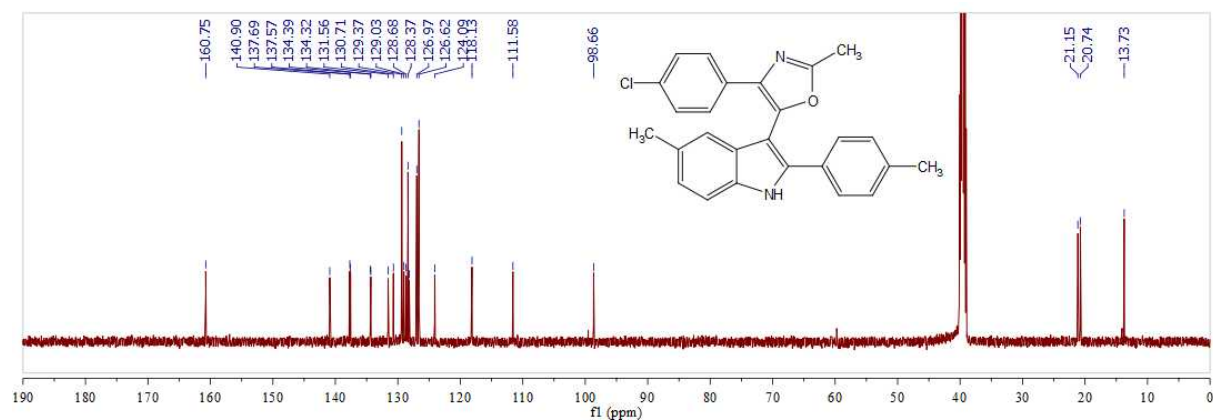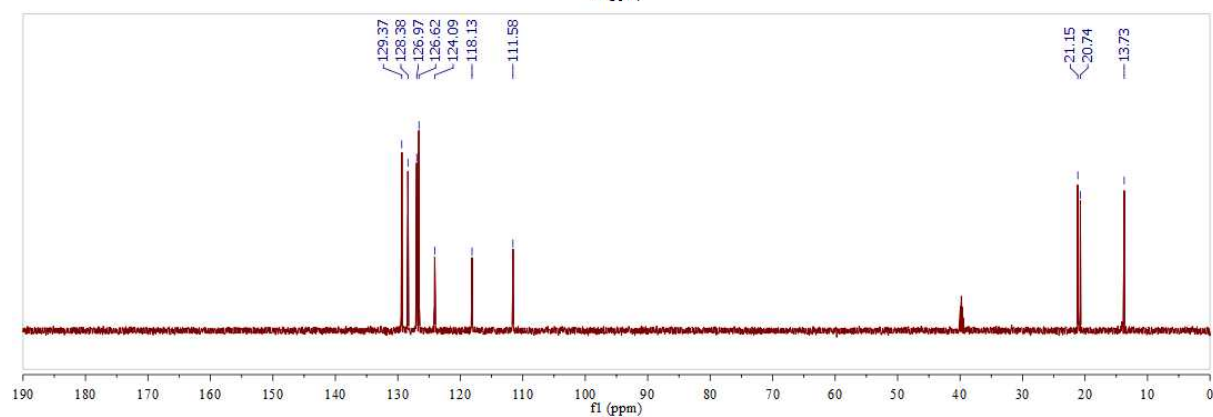

$^{13}\text{C}$  NMR and  $^{135}\text{DEPT}$  Spectra of **4j** in  $\text{DMSO-d}_6$  at 296 K ( $\delta$  in ppm).

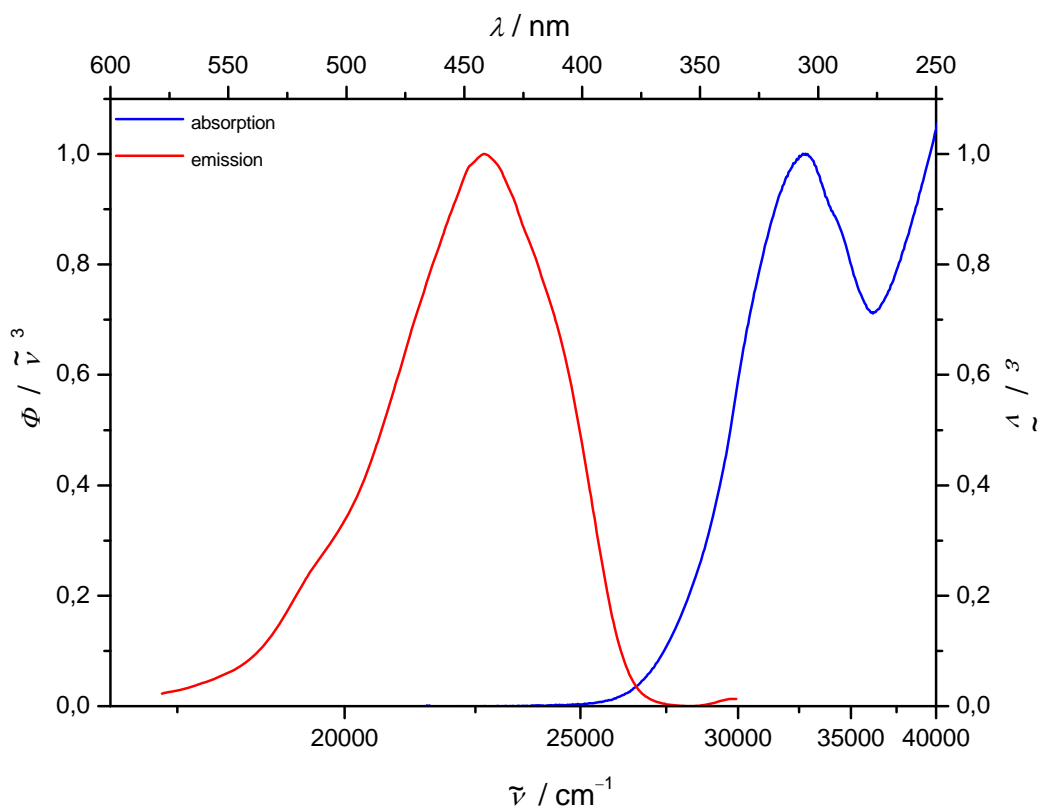

Normalized UV/Vis and fluorescence spectra of **4j** (recorded in EtOH at 298 K).



### 2-Methyl-5-(5-methyl-2-*p*-tolyl-1*H*-indol-3-yl)-4-*p*-tolylloxazole (4k)

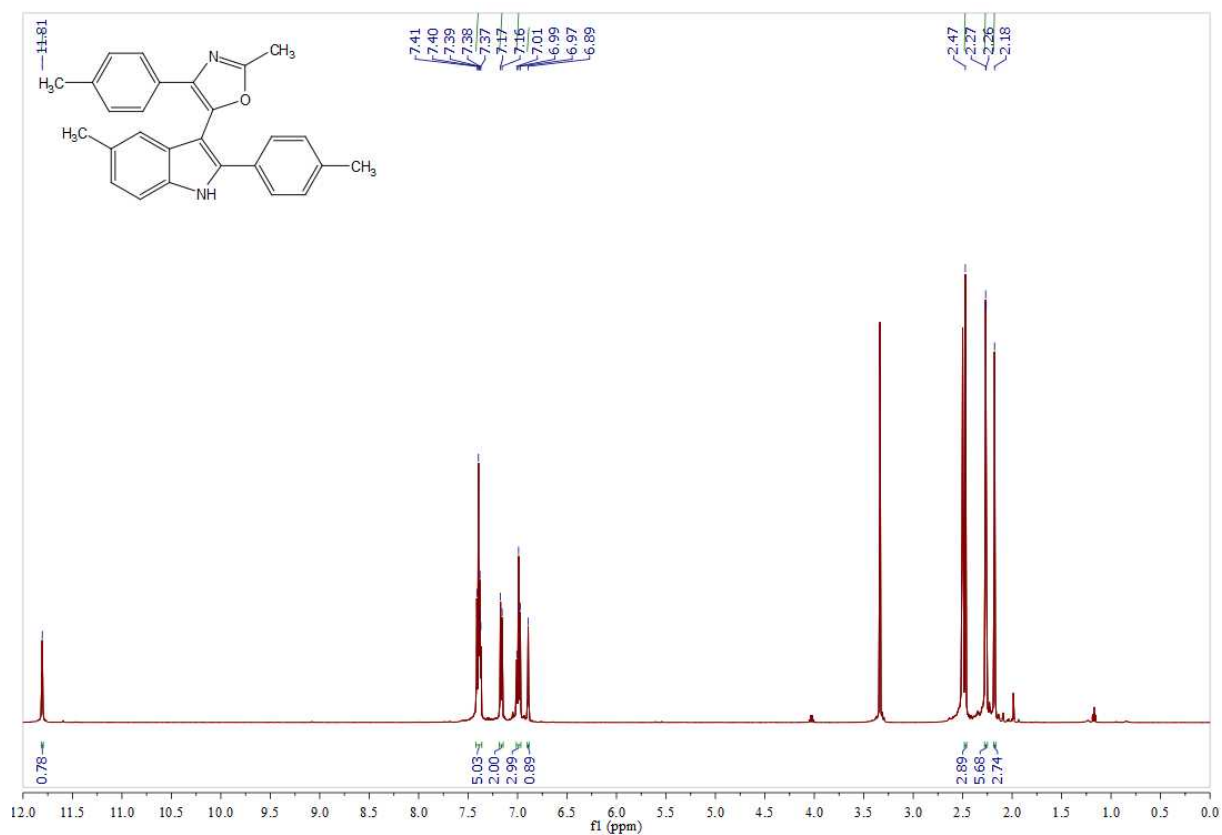

<sup>1</sup>H NMR of **4k** in DMSO-d<sub>6</sub> at 296 K ( $\delta$  in ppm).

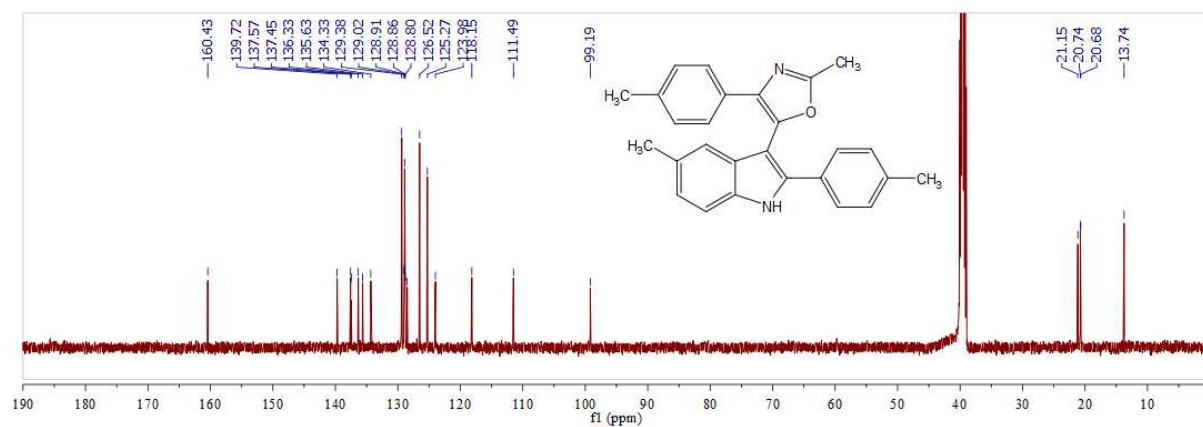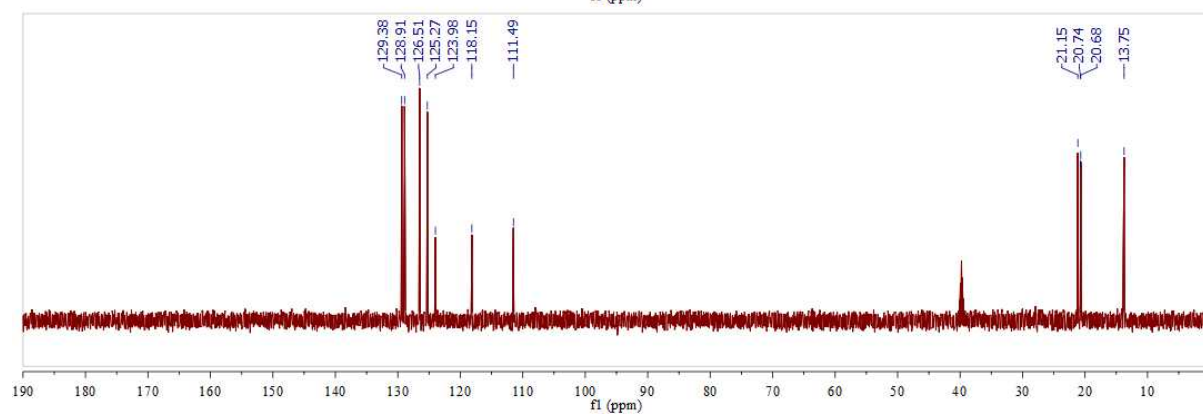

$^{13}\text{C}$  NMR and  $^{135}\text{-DEPT}$  Spectra of **4k** in  $\text{DMSO-d}_6$  at 296 K ( $\delta$  in ppm).

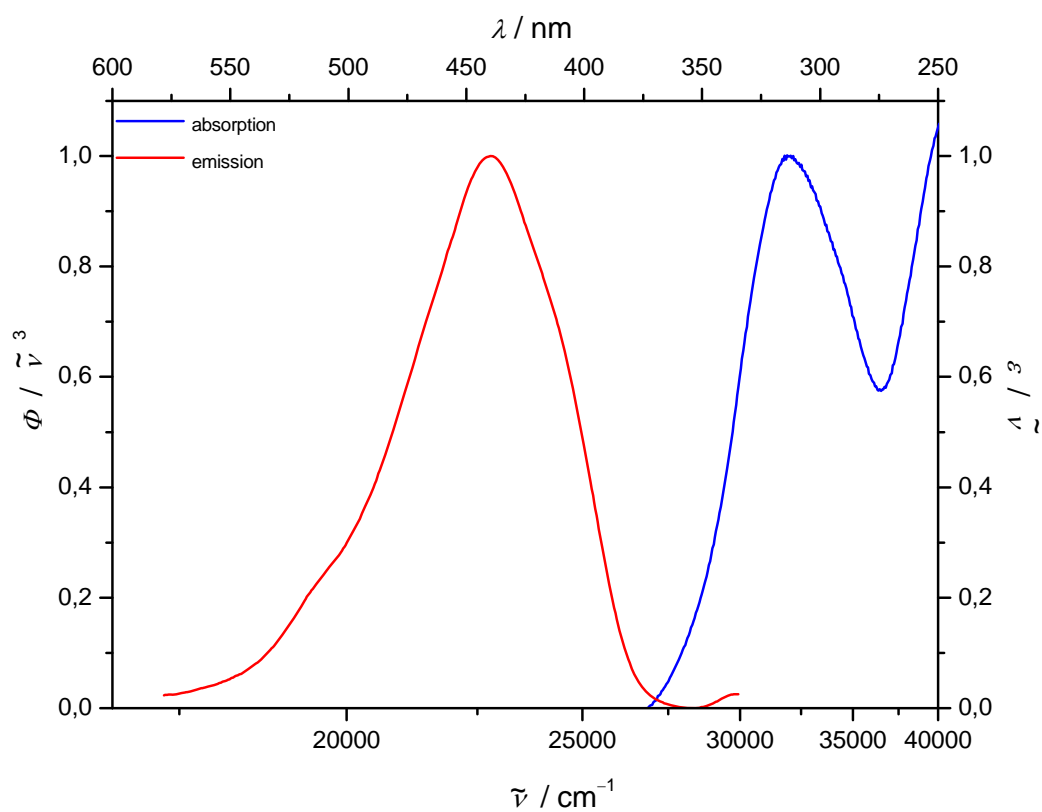

Normalized UV/Vis and fluorescence spectra of **4k** (recorded in EtOH at 298 K).

### 4-(4-Chlorophenyl)-2-methyl-5-(5-methyl-2-phenyl-1H-indol-3-yl)oxazole (4I)

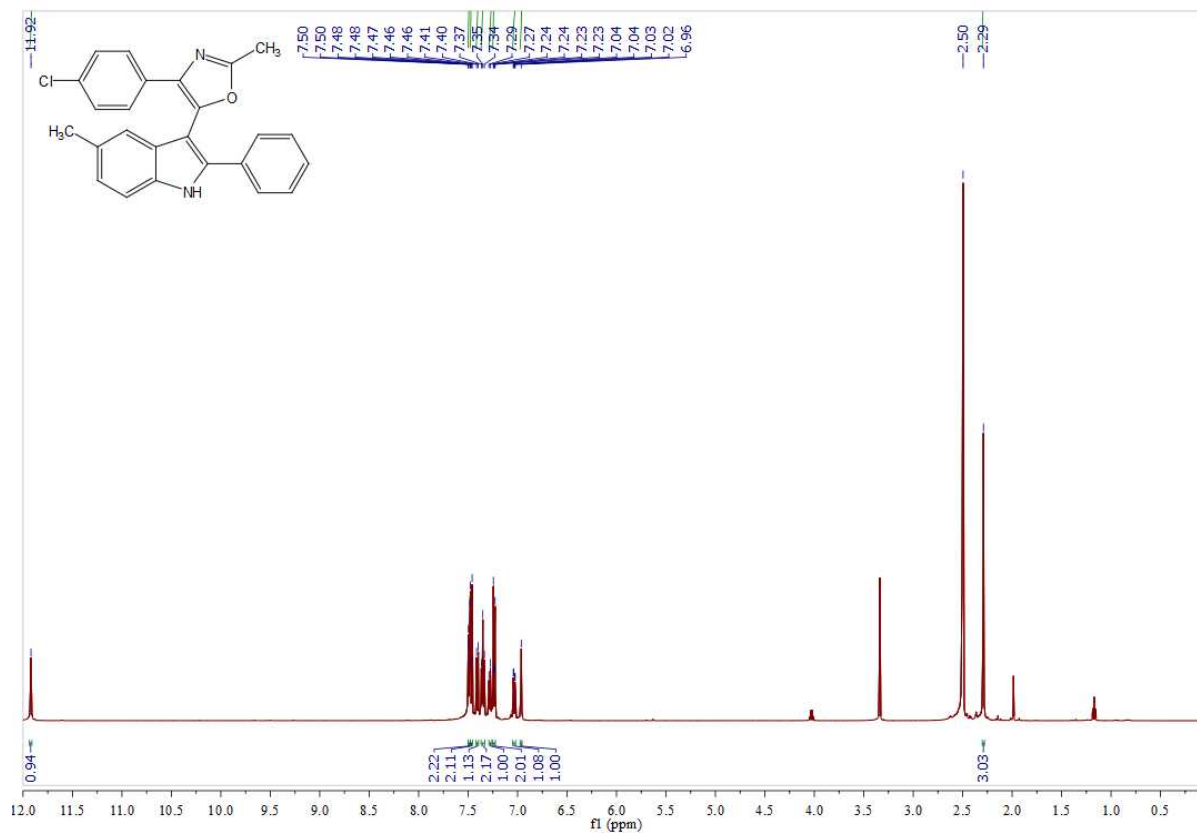

<sup>1</sup>H NMR of **4I** in DMSO-d<sub>6</sub> at 296 K (δ in ppm).

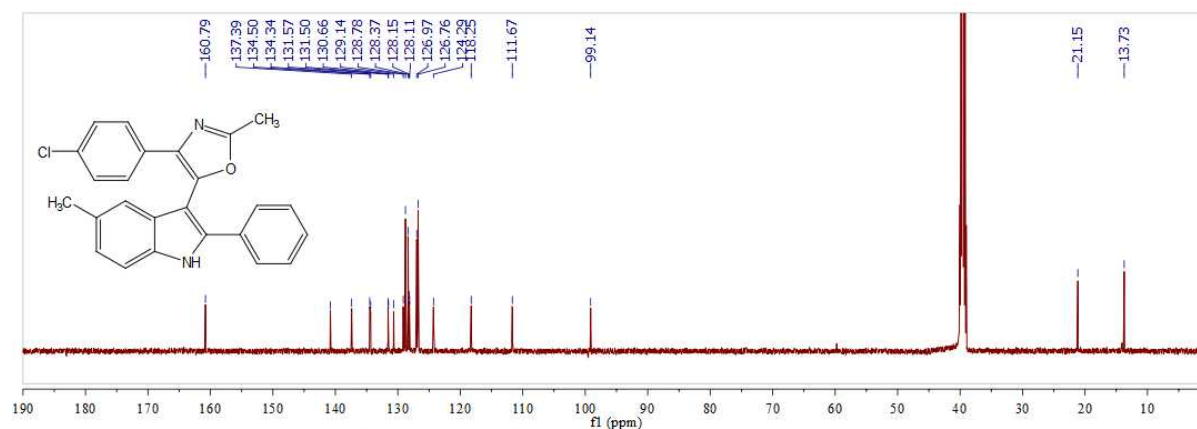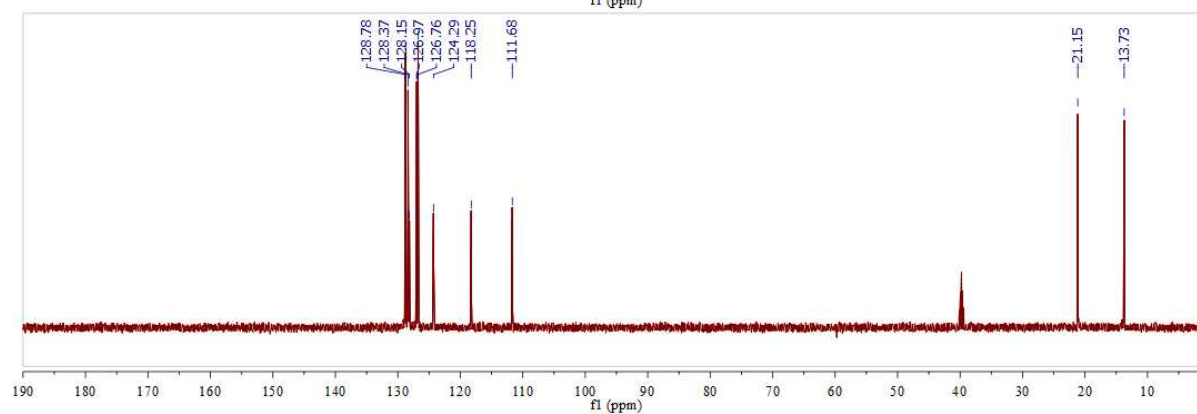

$^{13}\text{C}$  NMR and  $^{135}\text{-DEPT}$  Spectra of **4I** in  $\text{DMSO-d}^6$  at 296 K ( $\delta$  in ppm).

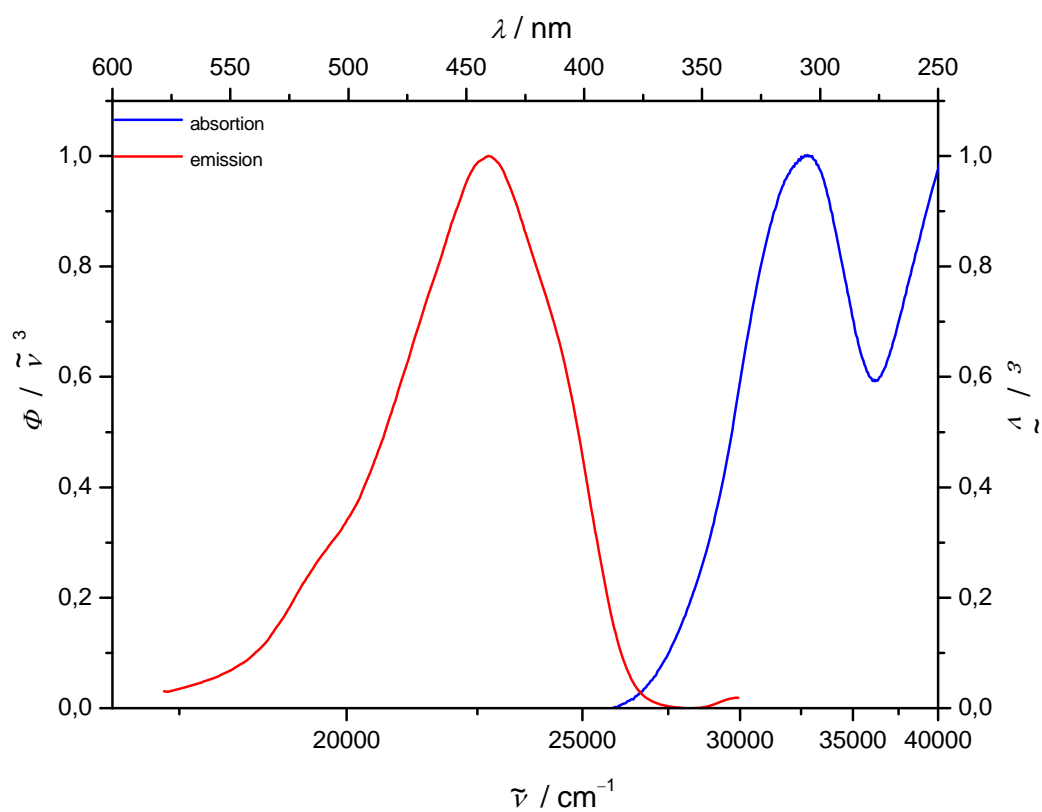

Normalized UV/Vis and fluorescence spectra of **4I** (recorded in EtOH at 298 K).

## 2-Methyl-5-(5-methyl-2-phenyl-1*H*-indol-3-yl)-4-*p*-tolylloxazole (4m)

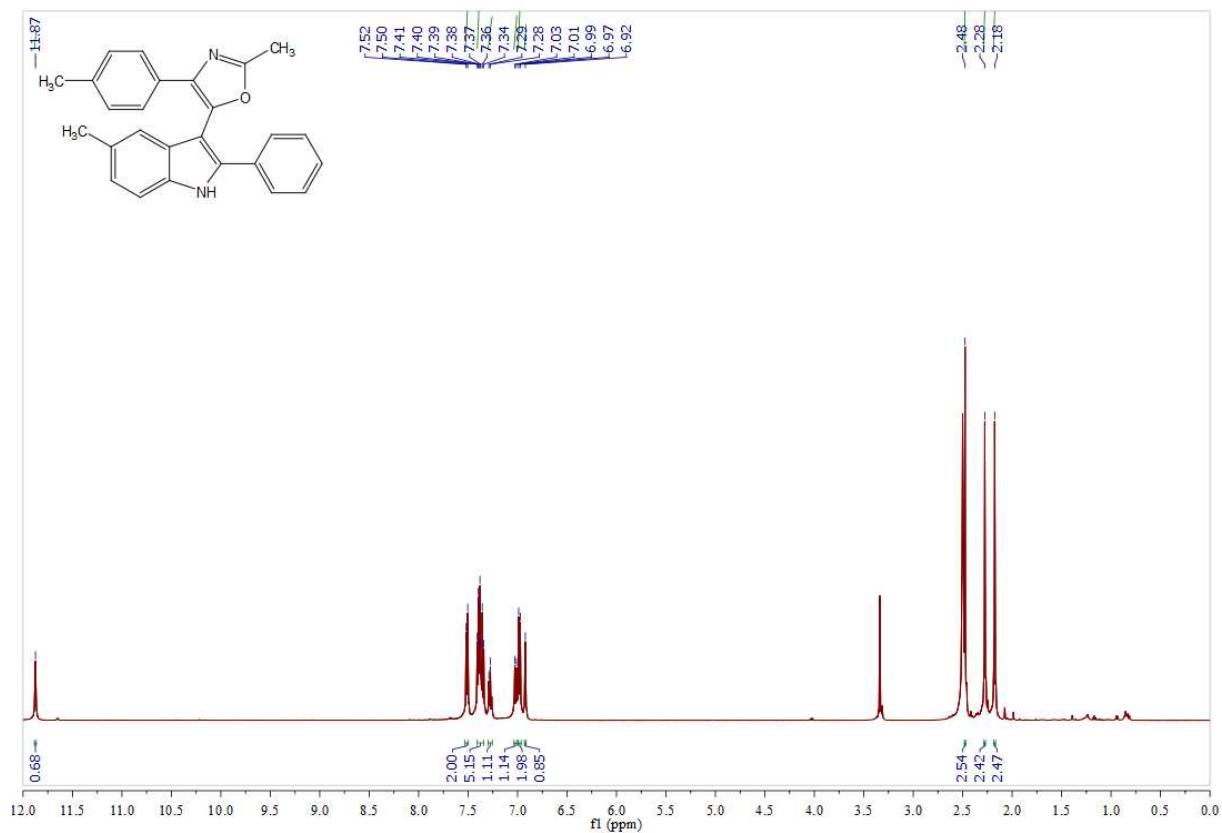

<sup>1</sup>H NMR of **4m** in DMSO-*d*<sub>6</sub> at 296 K ( $\delta$  in ppm).

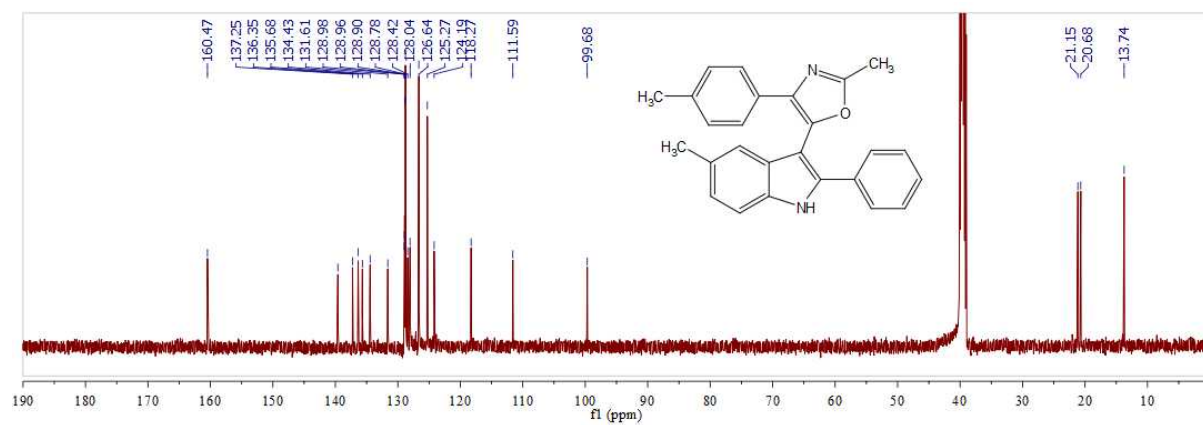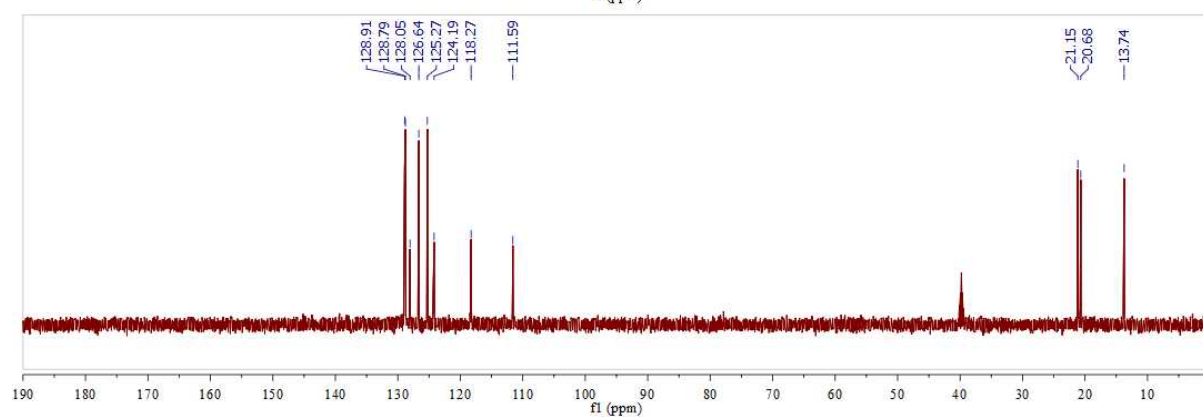

$^{13}\text{C}$  NMR and  $^{135}\text{-DEPT}$  Spectra of **4m** in  $\text{DMSO-d}_6$  at 296 K ( $\delta$  in ppm).

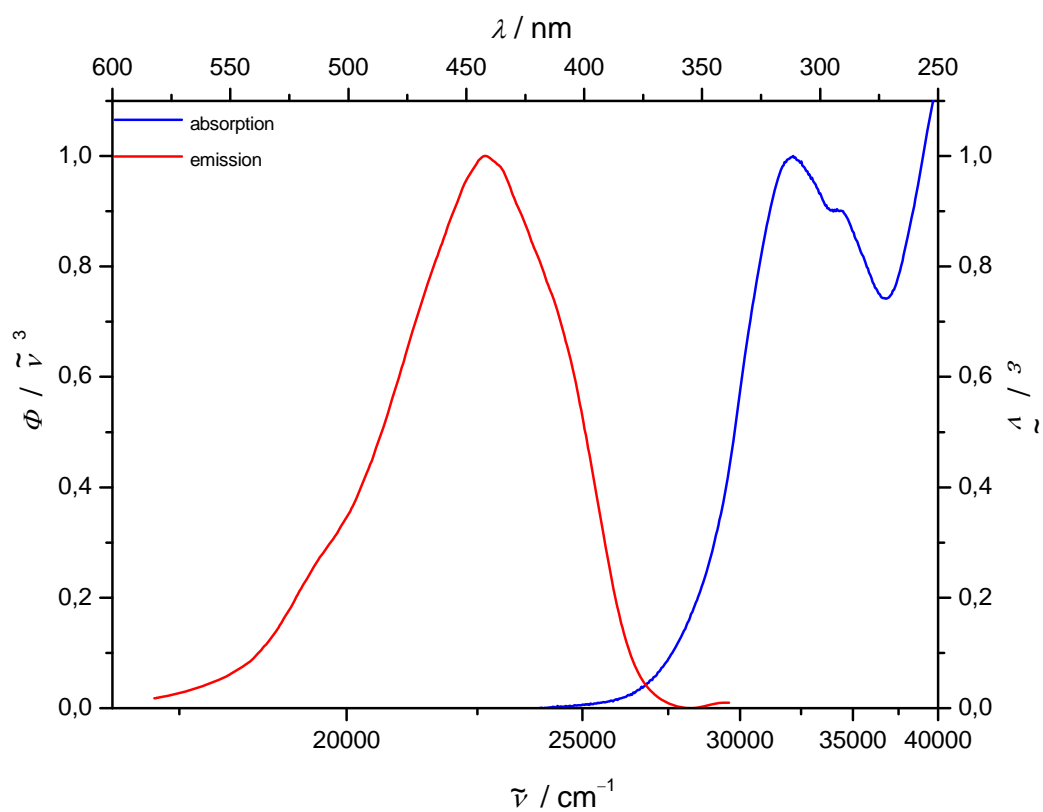

Normalized UV/Vis and fluorescence spectra of **4m** (recorded in EtOH at 298 K).

#### 4-(4-Chlorophenyl)-2-methyl-5-(5-methyl-2-(thiophen-2-yl)-1H-indol-3-yl)oxazole (4n)

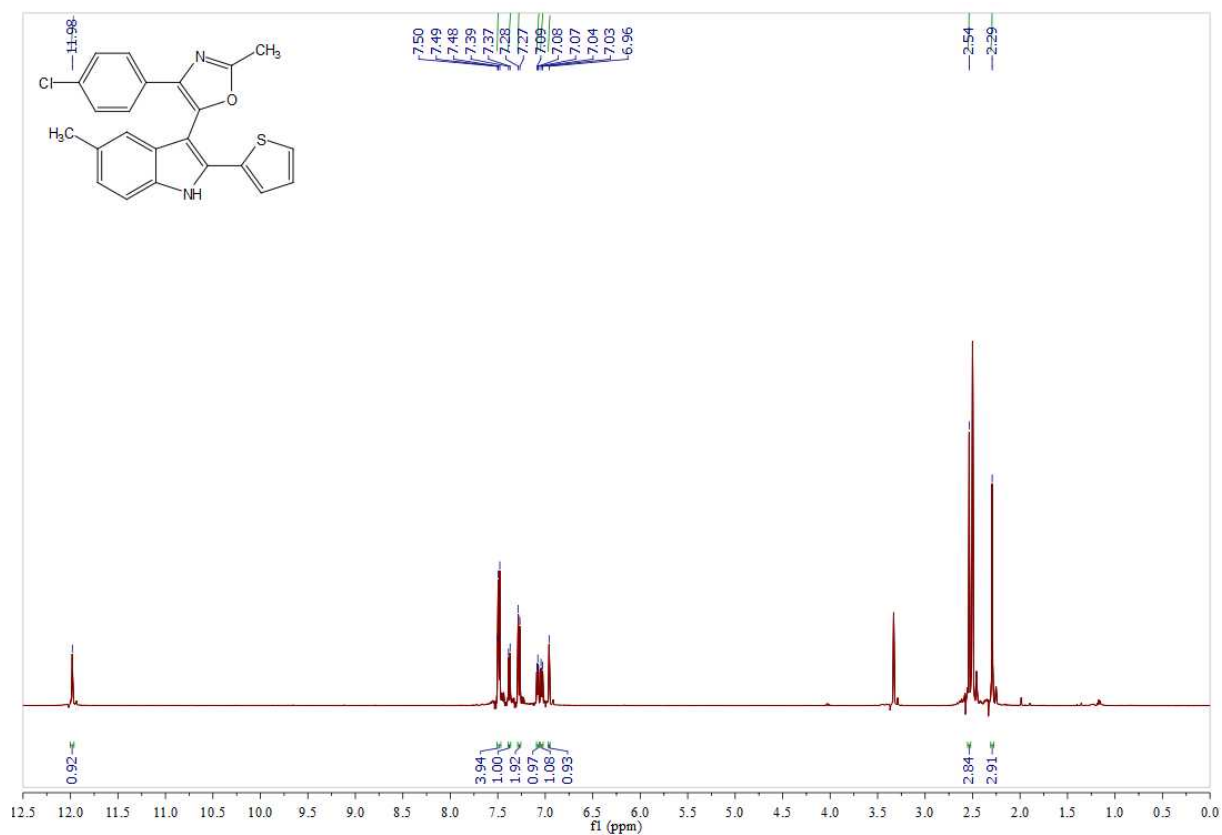

<sup>1</sup>H NMR of 4n in DMSO-d<sub>6</sub> at 296 K ( $\delta$  in ppm).

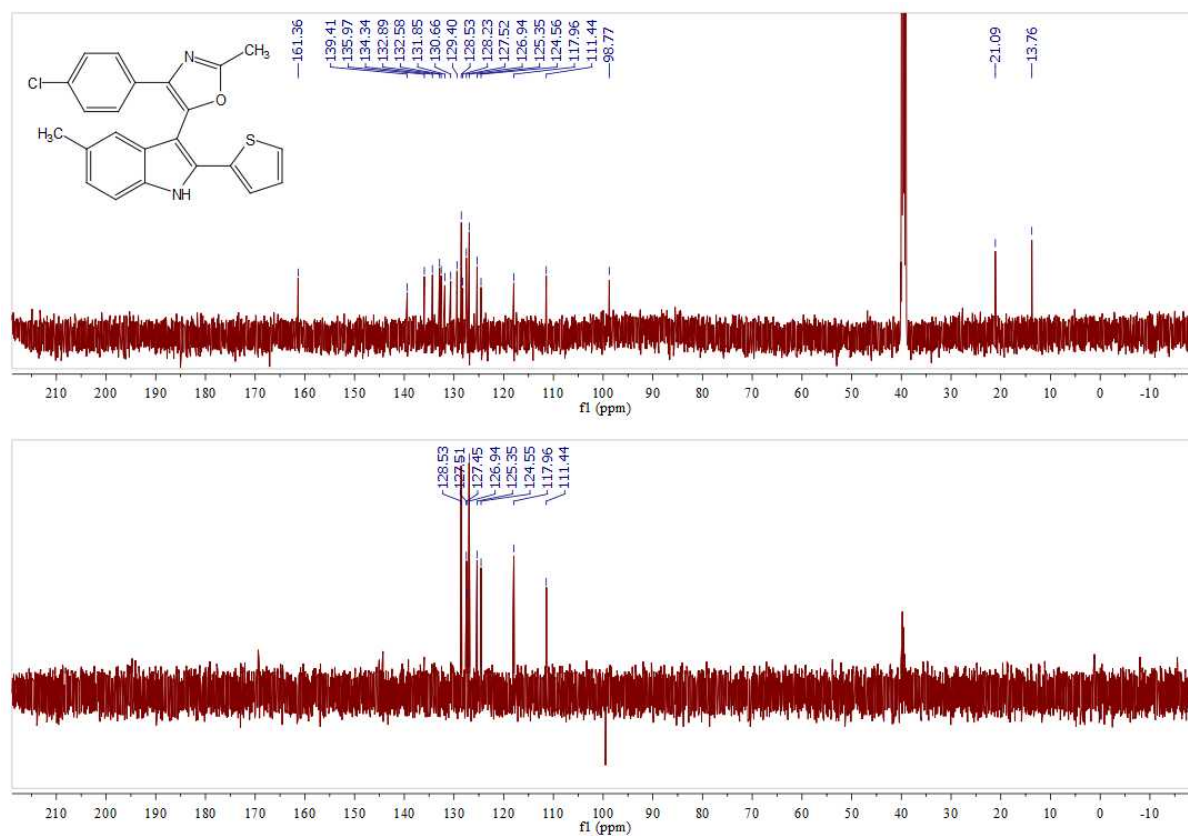

$^{13}\text{C}$  NMR and  $^{135}\text{-DEPT}$  Spectra of **4n** in  $\text{DMSO-d}_6$  at 296 K ( $\delta$  in ppm).

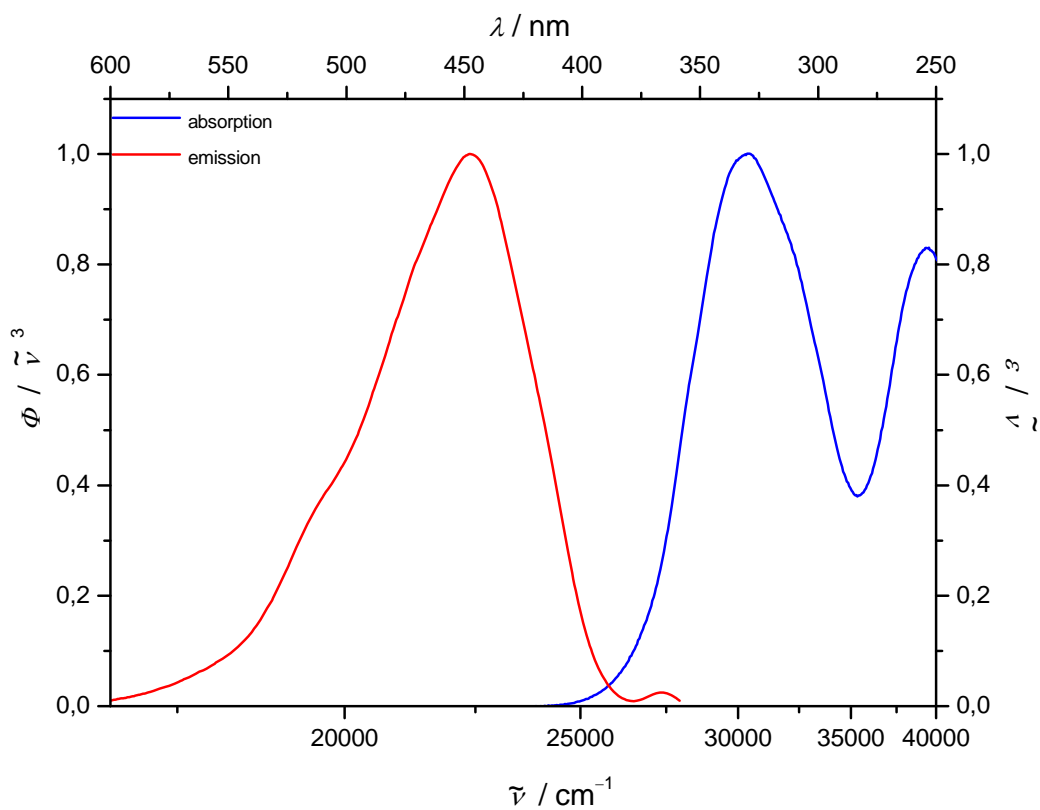

Normalized UV/Vis and fluorescence spectra of **4n** (recorded in EtOH at 298 K).



#### 4-(4-Chlorophenyl)-5-(2-(3-chlorophenyl)-5-methyl-1H-indol-3-yl)-2-methyloxazole (4o)

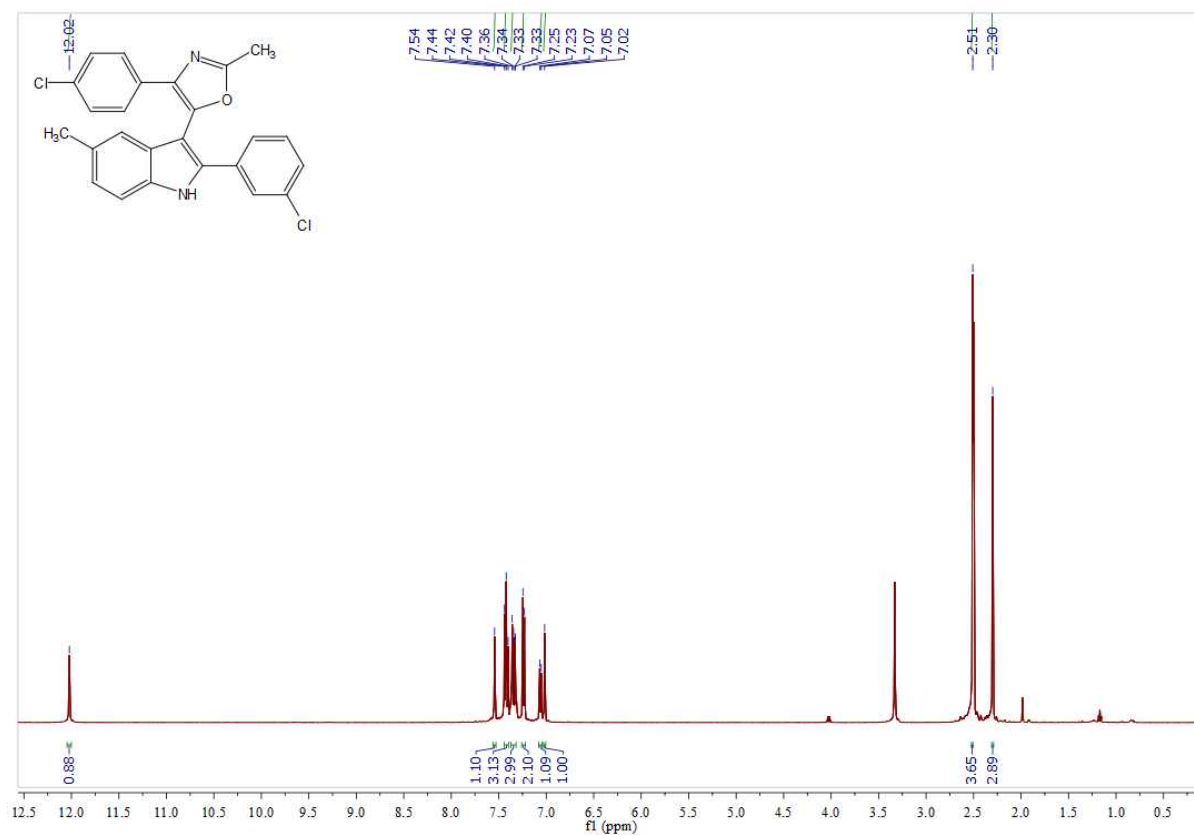

<sup>1</sup>H NMR of **4o** in DMSO-d<sub>6</sub> at 296 K ( $\delta$  in ppm).

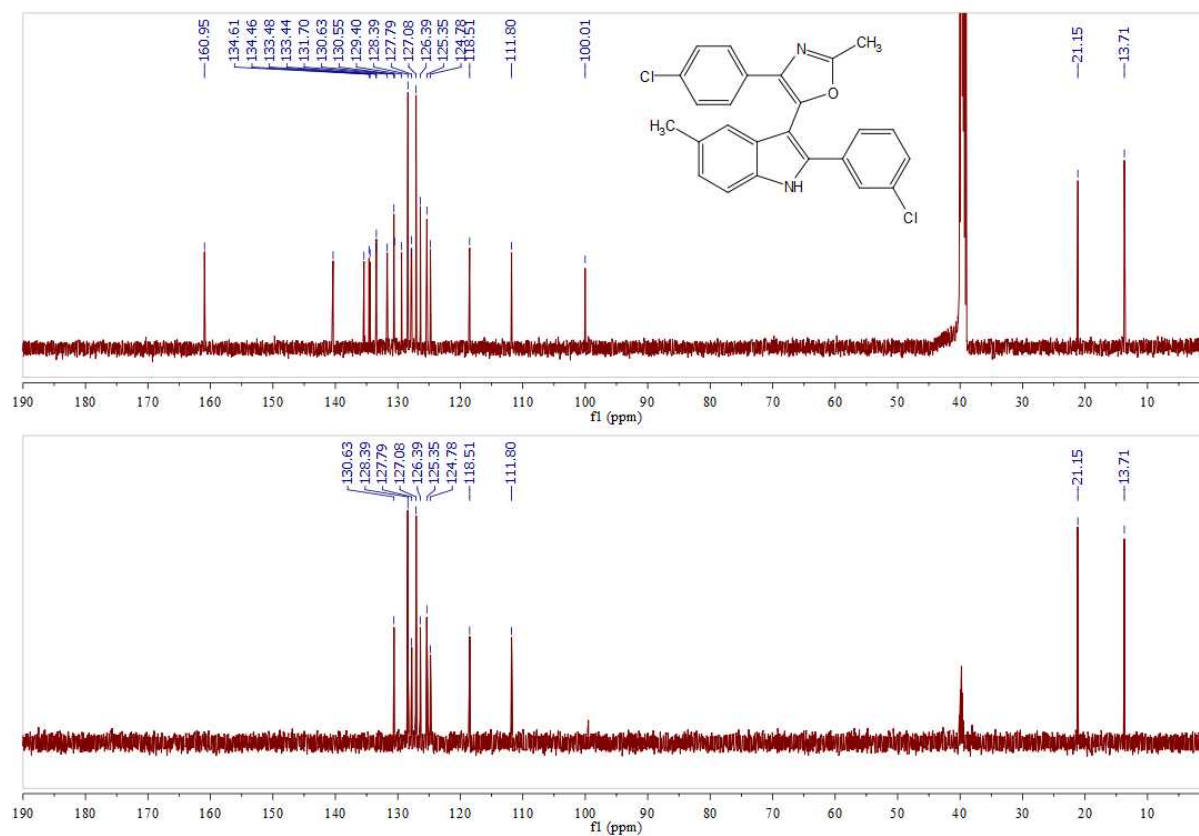

$^{13}\text{C}$  NMR and  $^{135}\text{-DEPT}$  Spectra of **4o** in  $\text{DMSO-d}_6$  at 296 K ( $\delta$  in ppm).

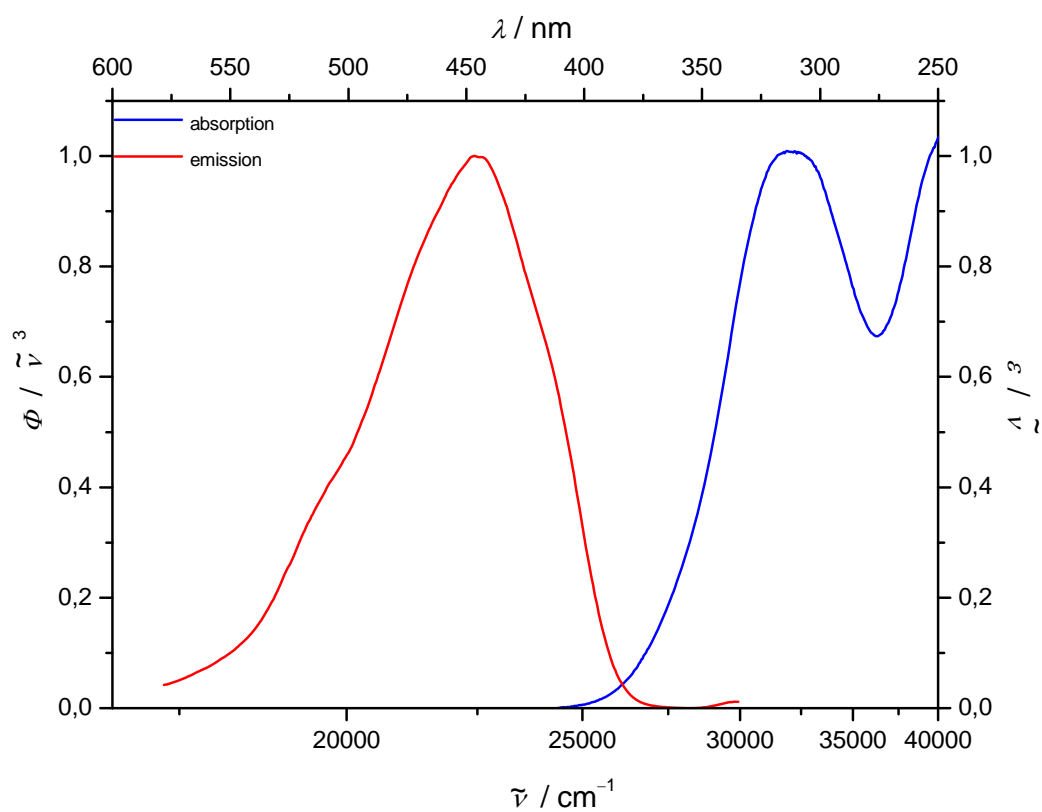

Normalized UV/Vis and fluorescence spectra of **4o** (recorded in EtOH at 298 K).

## 2-Methyl-5-(5-methyl-2-(thiophen-2-yl)-1H-indol-3-yl)-4-*p*-tolylloxazole (4p)

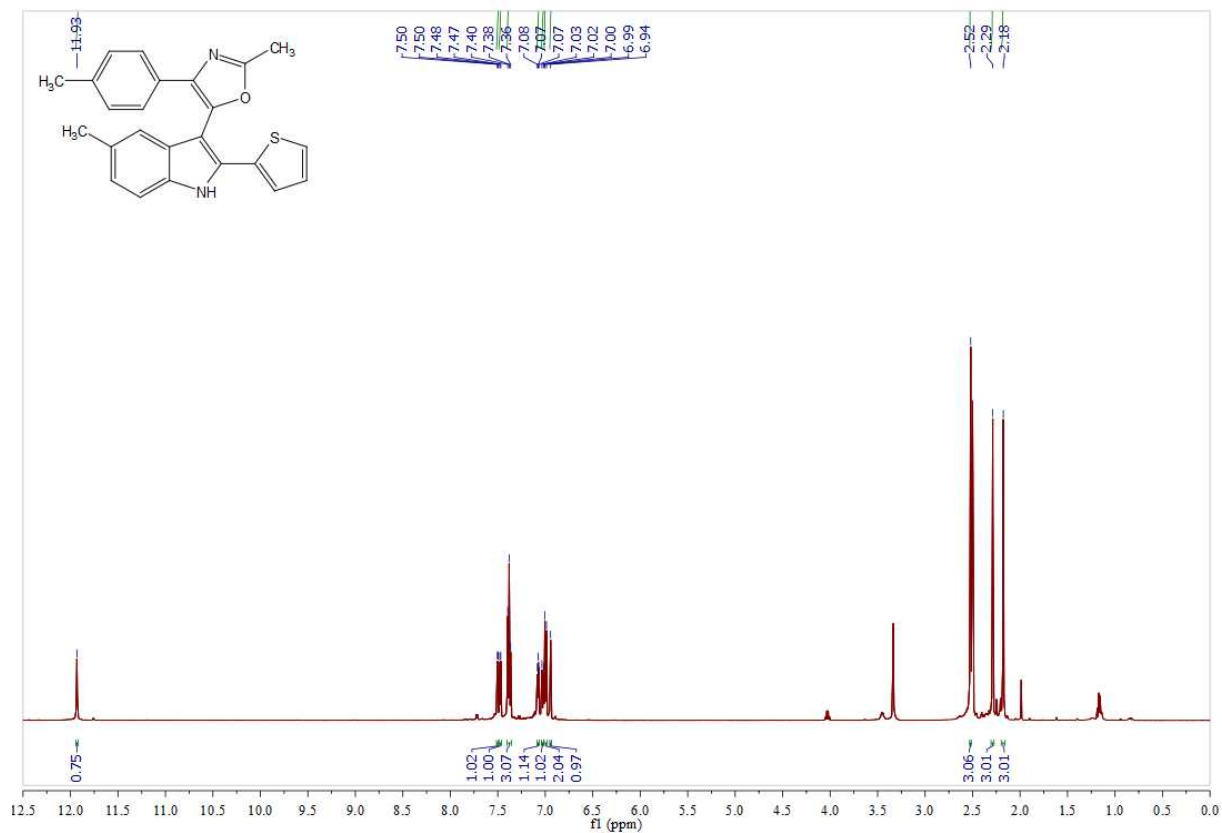

<sup>1</sup>H NMR of 4p in DMSO-d<sub>6</sub> at 296 K ( $\delta$  in ppm).

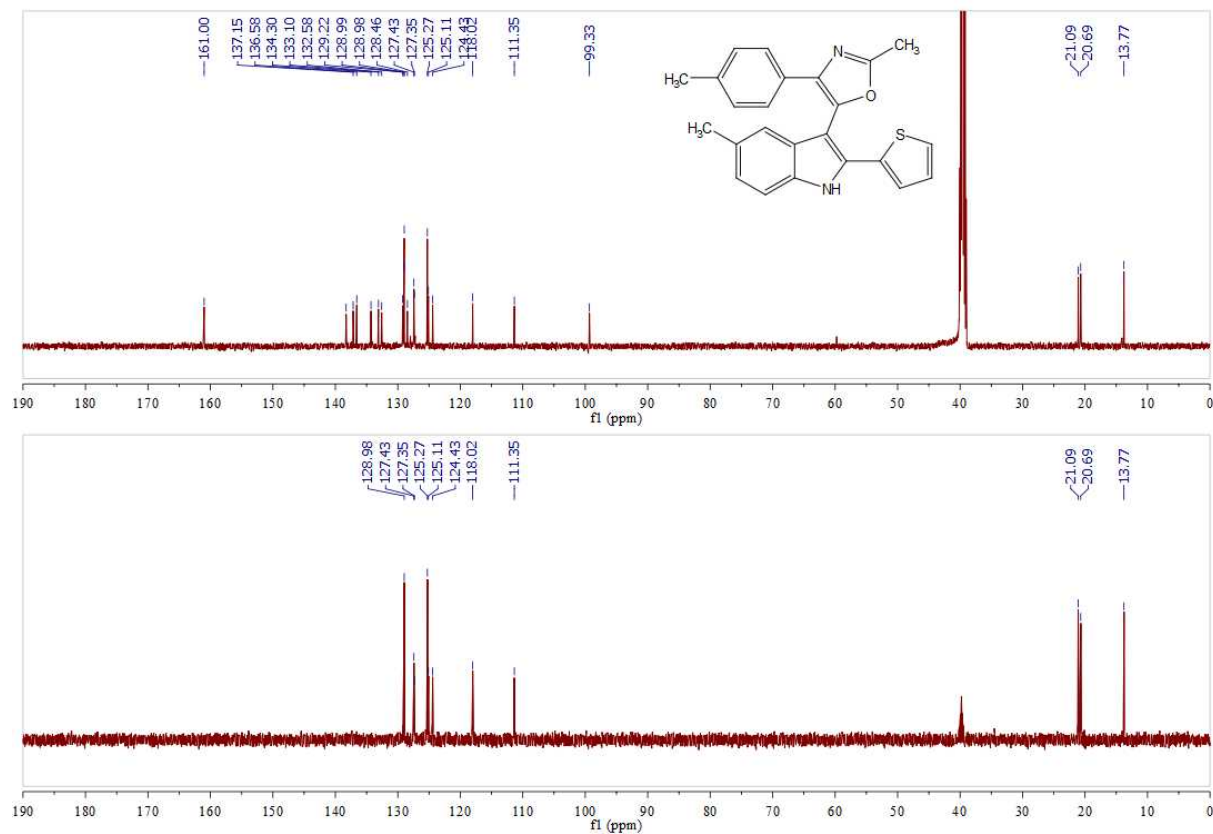

$^{13}\text{C}$  NMR and  $^{135}\text{-DEPT}$  Spectra of **4p** in  $\text{DMSO-d}_6$  at 296 K ( $\delta$  in ppm).

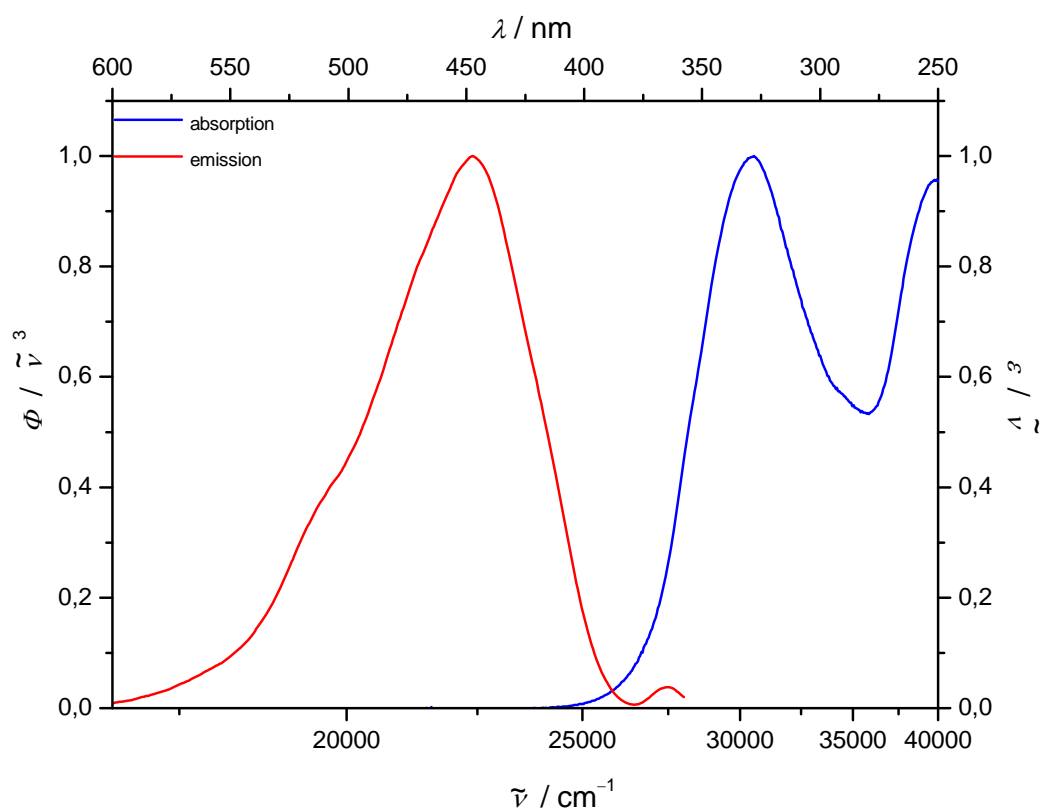

Normalized UV/Vis and fluorescence spectra of **4p** (recorded in EtOH at 298 K).

### 5-(5-Chloro-2-*p*-tolyl-1*H*-indol-3-yl)-2-methyl-4-*p*-tolylloxazole (4q)

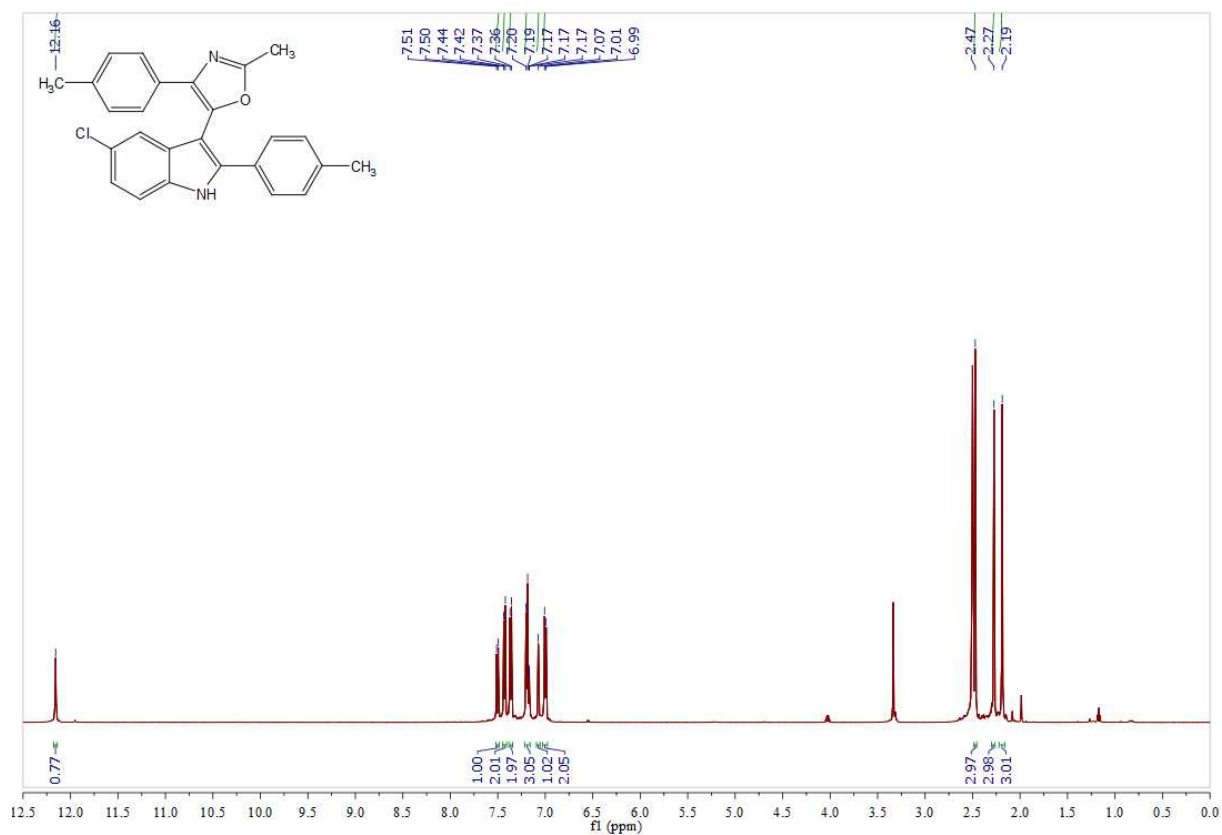

<sup>1</sup>H NMR of **4q** in DMSO-d<sub>6</sub> at 296 K ( $\delta$  in ppm).

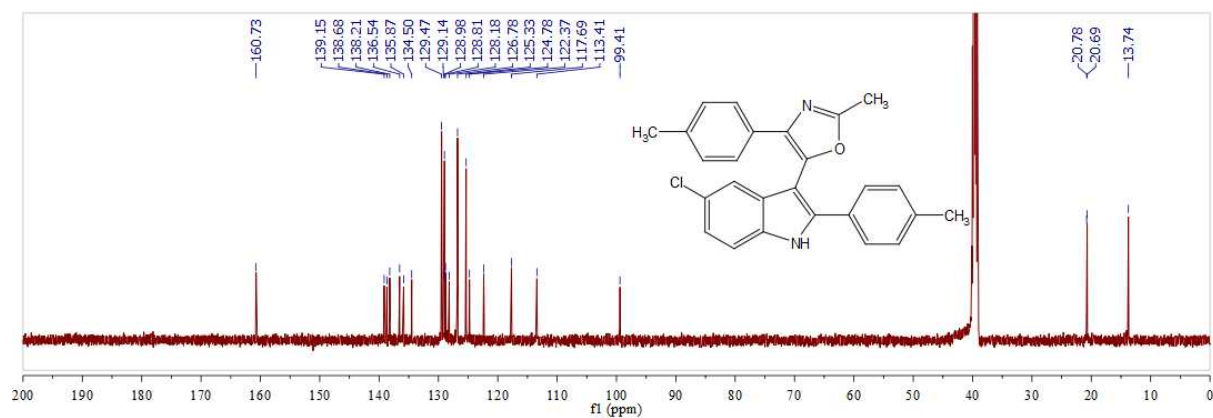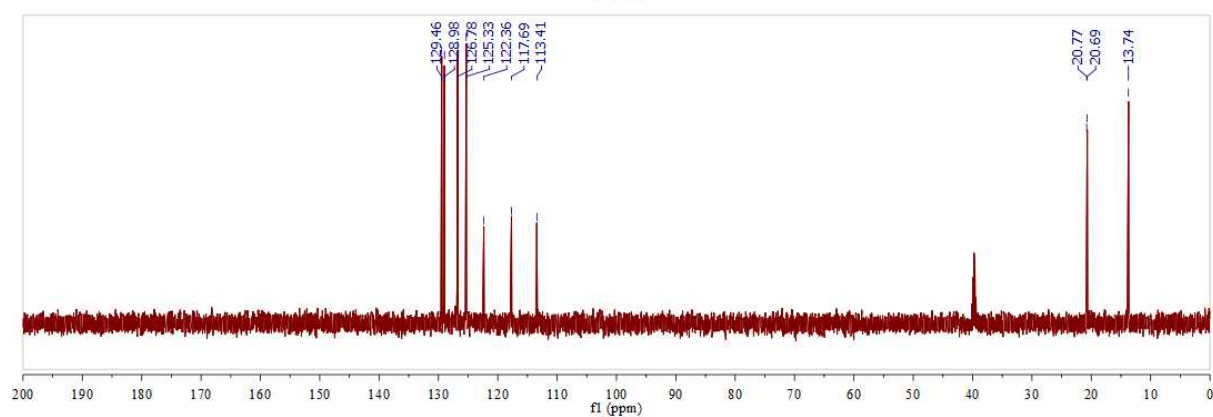

$^{13}\text{C}$  NMR and  $^{135}\text{-DEPT}$  Spectra of **4q** in  $\text{DMSO-d}_6$  at 296 K ( $\delta$  in ppm).

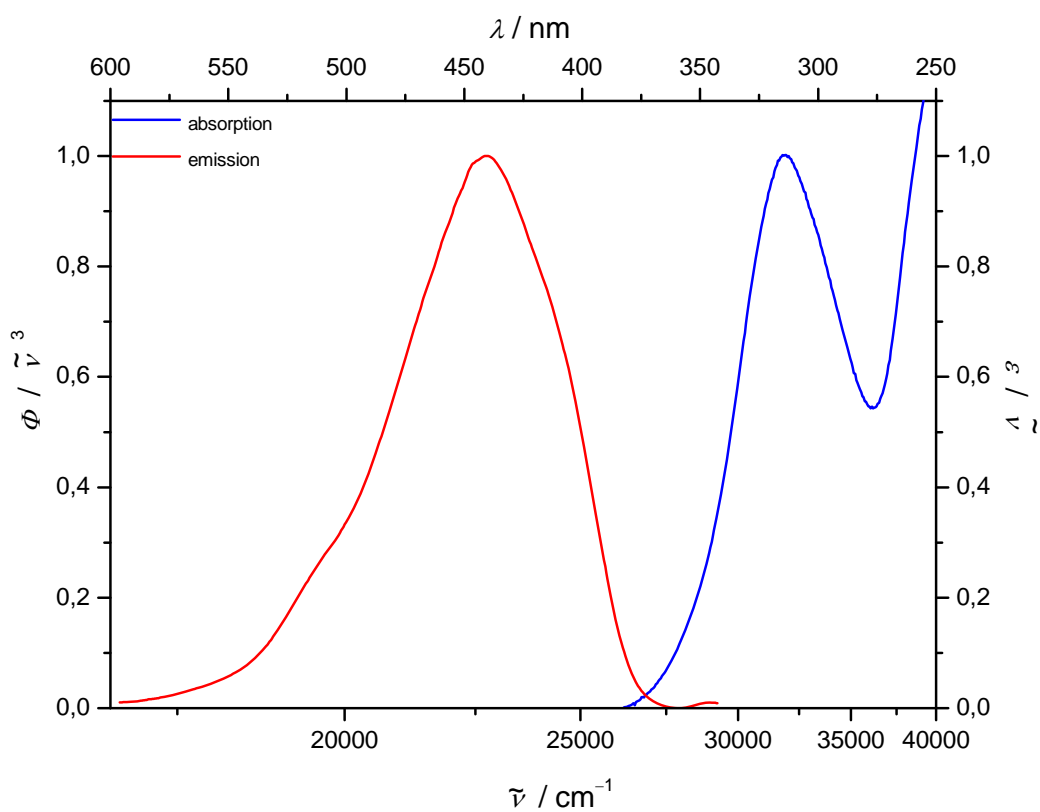

Normalized UV/Vis and fluorescence spectra of **4q** (recorded in EtOH at 298 K).

### 5-(5-Chloro-2-(thiophen-2-yl)-1H-indol-3-yl)-4-(4-chlorophenyl)-2-methyloxazole (4r)

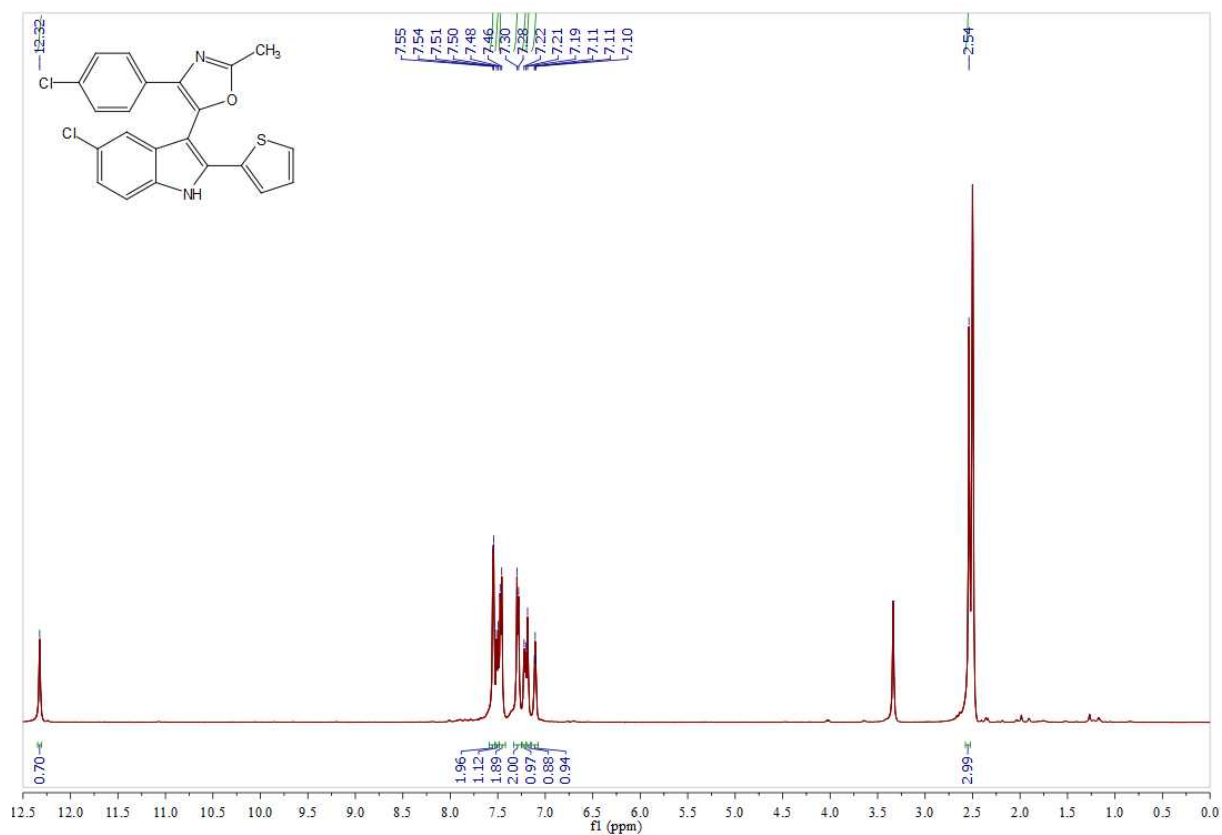

<sup>1</sup>H NMR of **4r** in DMSO-d<sub>6</sub> at 296 K (δ in ppm).

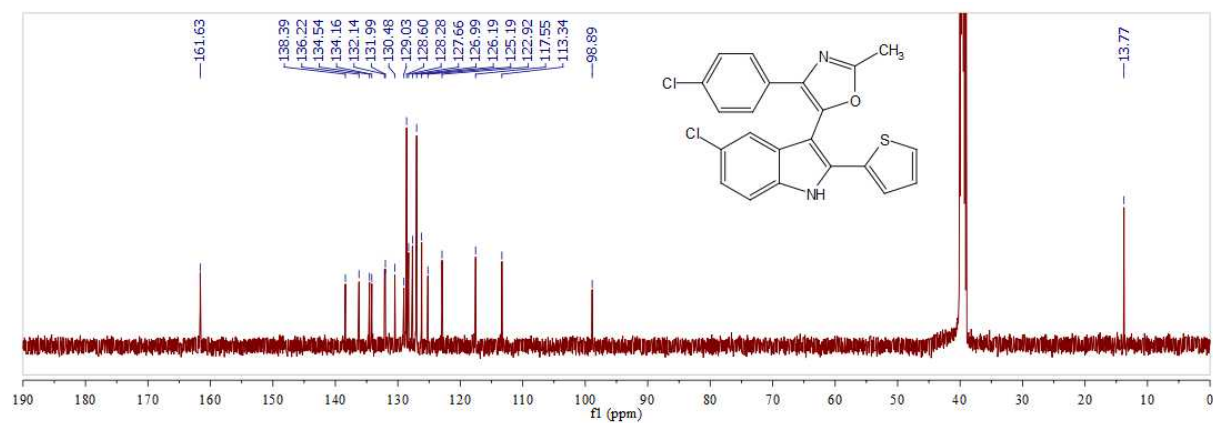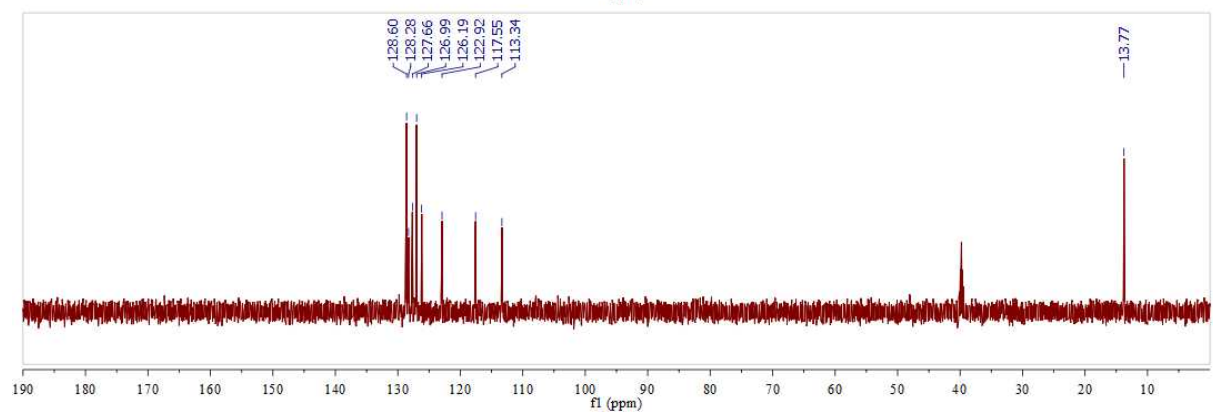

$^{13}\text{C}$  NMR and  $^{135}\text{-DEPT}$  Spectra of **4r** in  $\text{DMSO-d}_6$  at 296 K ( $\delta$  in ppm).

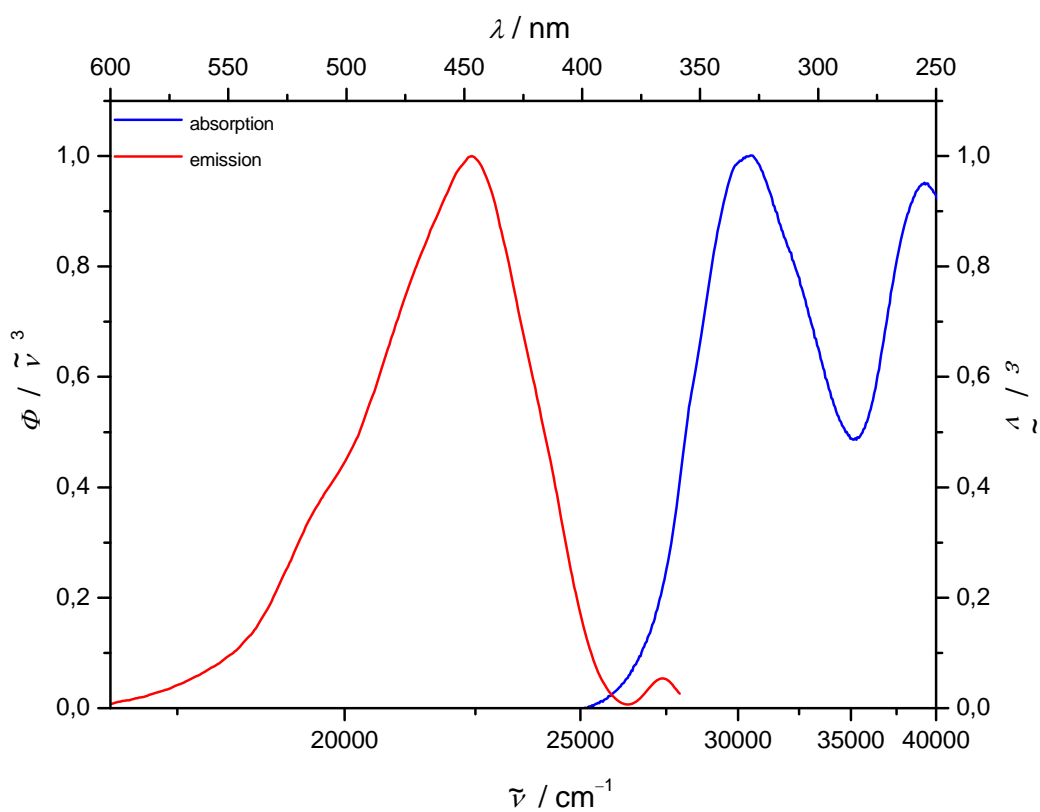

Normalized UV/Vis and fluorescence spectra of **4r** (recorded in EtOH at 298 K).



### 5-(5-Chloro-2-(4-chlorophenyl)-1H-indol-3-yl)-4-(4-chlorophenyl)-2-methyloxazole (4s)

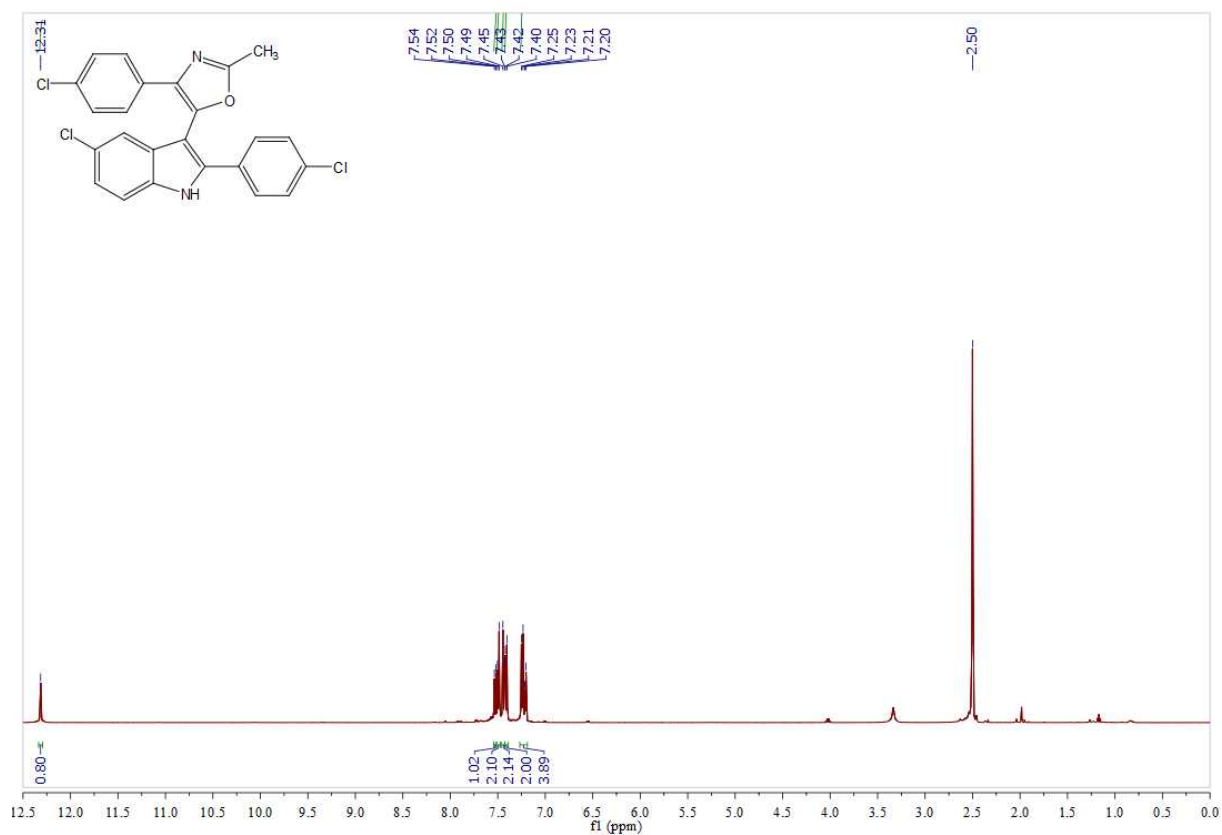

**<sup>1</sup>H NMR of 4s in DMSO-d<sub>6</sub> at 296 K (δ in ppm).**

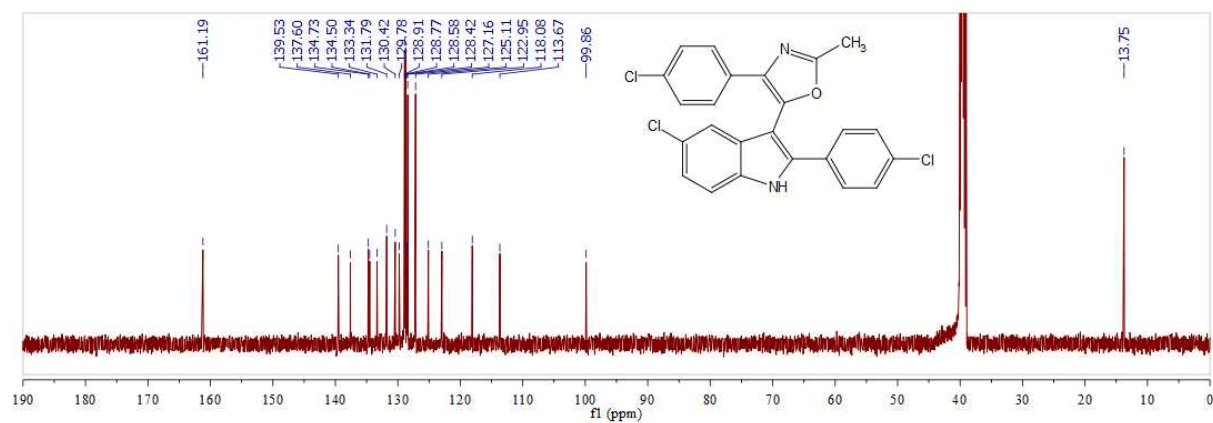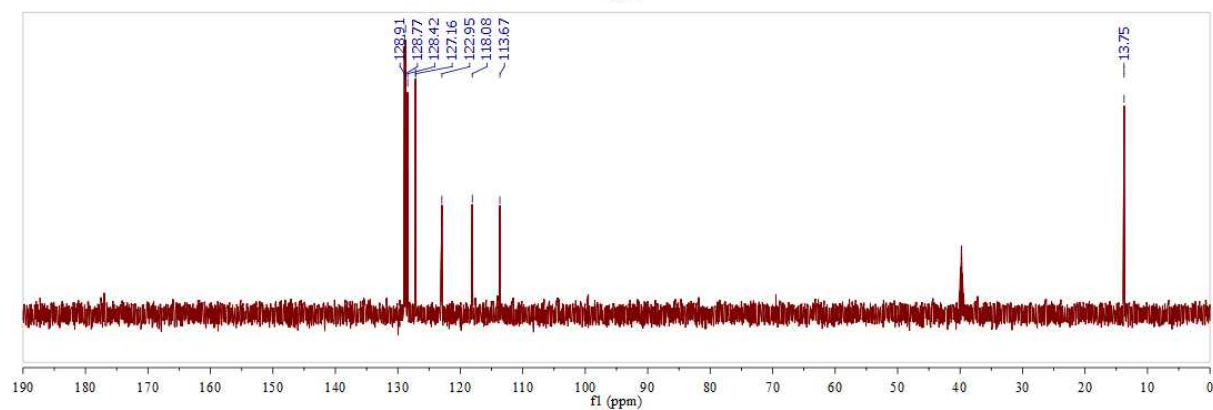

$^{13}\text{C}$  NMR and  $^{135}\text{-DEPT}$  Spectra of **4s** in  $\text{DMSO-d}_6$  at 296 K ( $\delta$  in ppm).

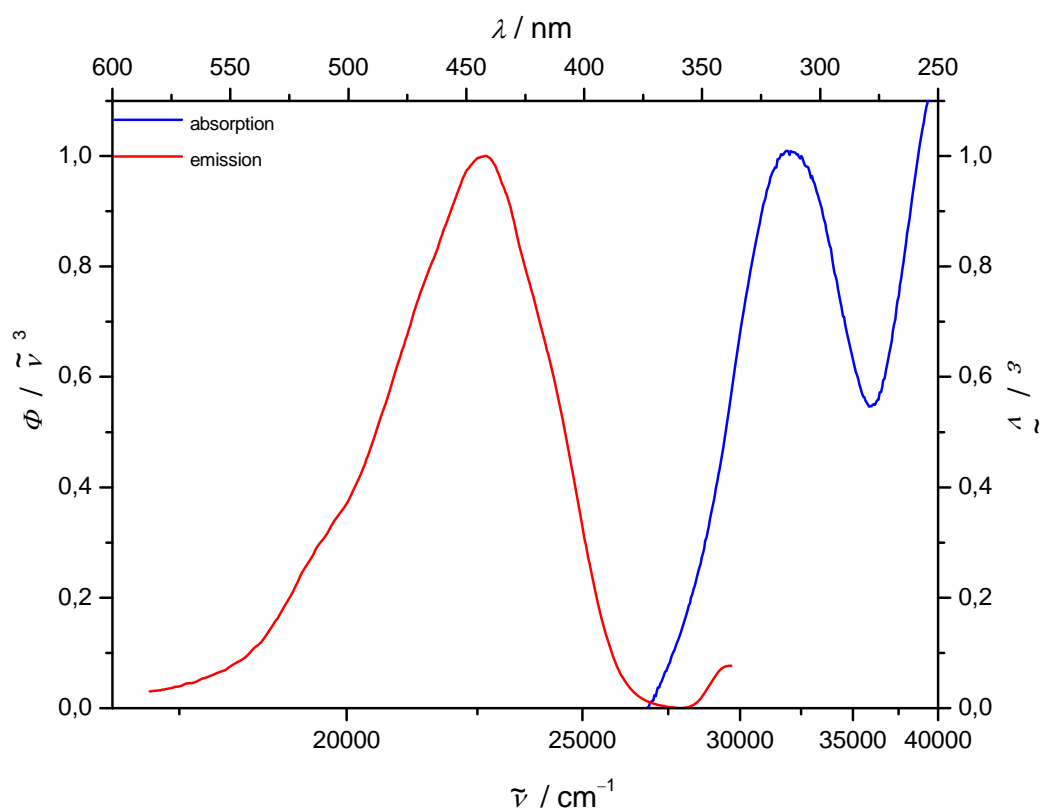

Normalized UV/Vis and fluorescence spectra of **4s** (recorded in EtOH at 298 K).

### 5-(5-Chloro-2-(4-chlorophenyl)-1*H*-indol-3-yl)-2-methyl-4-*p*-tolylloxazol (4t)

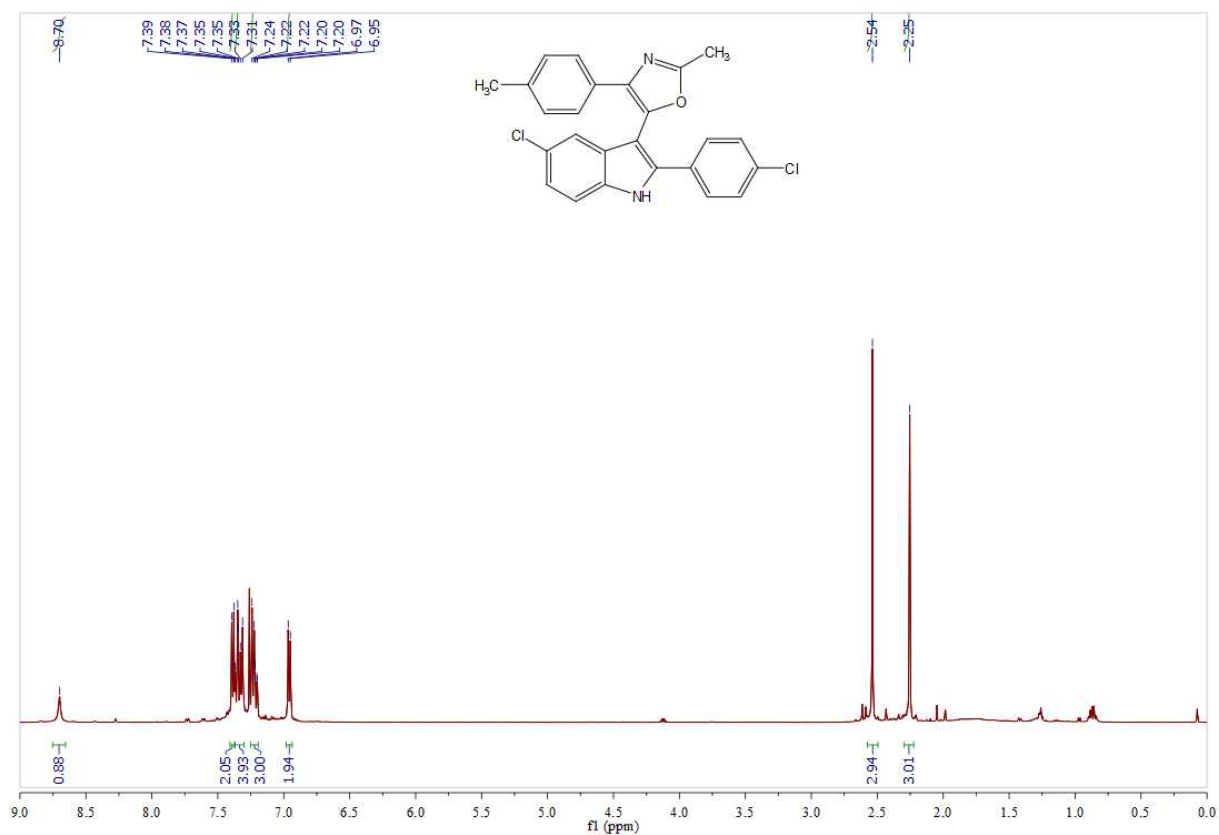

<sup>1</sup>H NMR of **4t** in CDCl<sub>3</sub> at 296 K (δ in ppm).

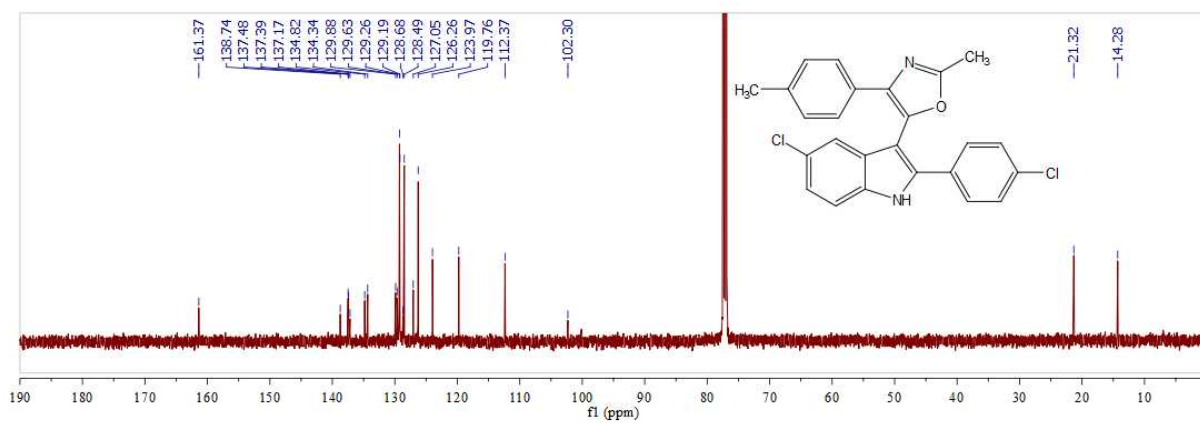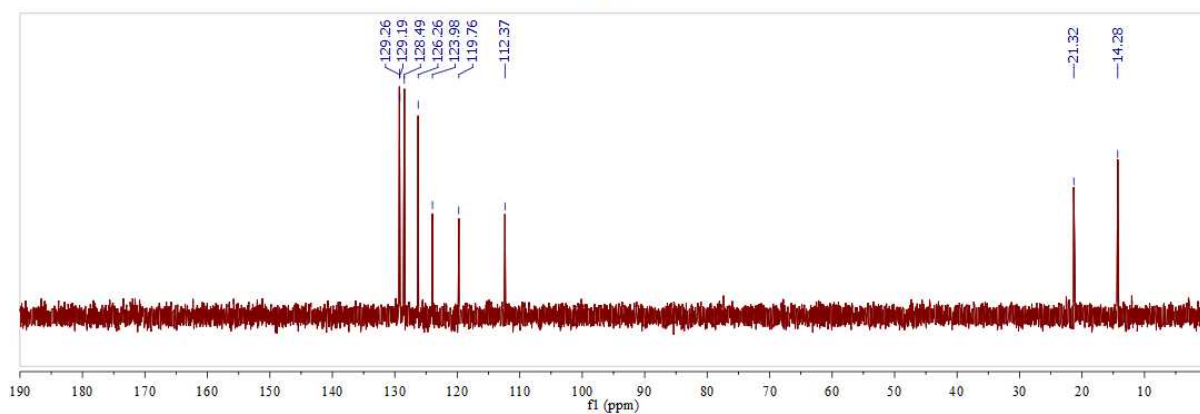

$^{13}\text{C}$  NMR and  $^{135}\text{-DEPT}$  Spectra of **4t** in  $\text{CDCl}_3$  at 296 K ( $\delta$  in ppm).

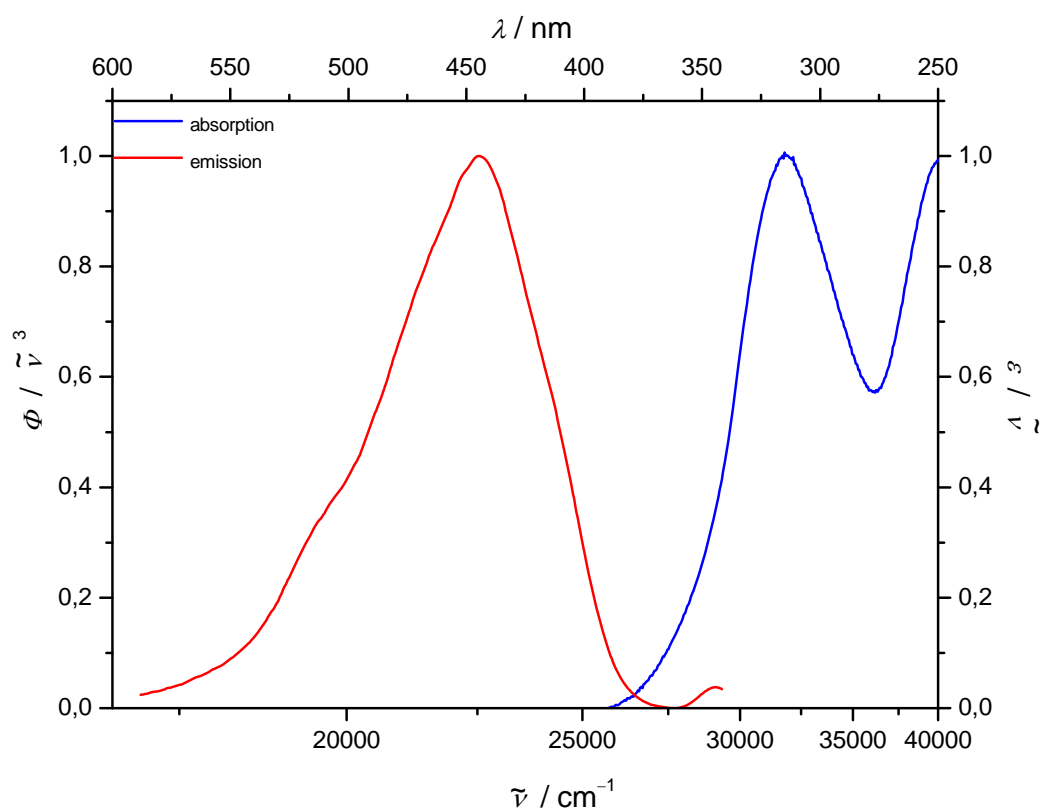

Normalized UV/Vis and fluorescence spectra of **4t** (recorded in EtOH at 298 K).

**(5-Chloro-2-(4-methoxyphenyl)-1*H*-indol-3-yl)-2-methyl-4-*p*-tolylloxazole (4u)**

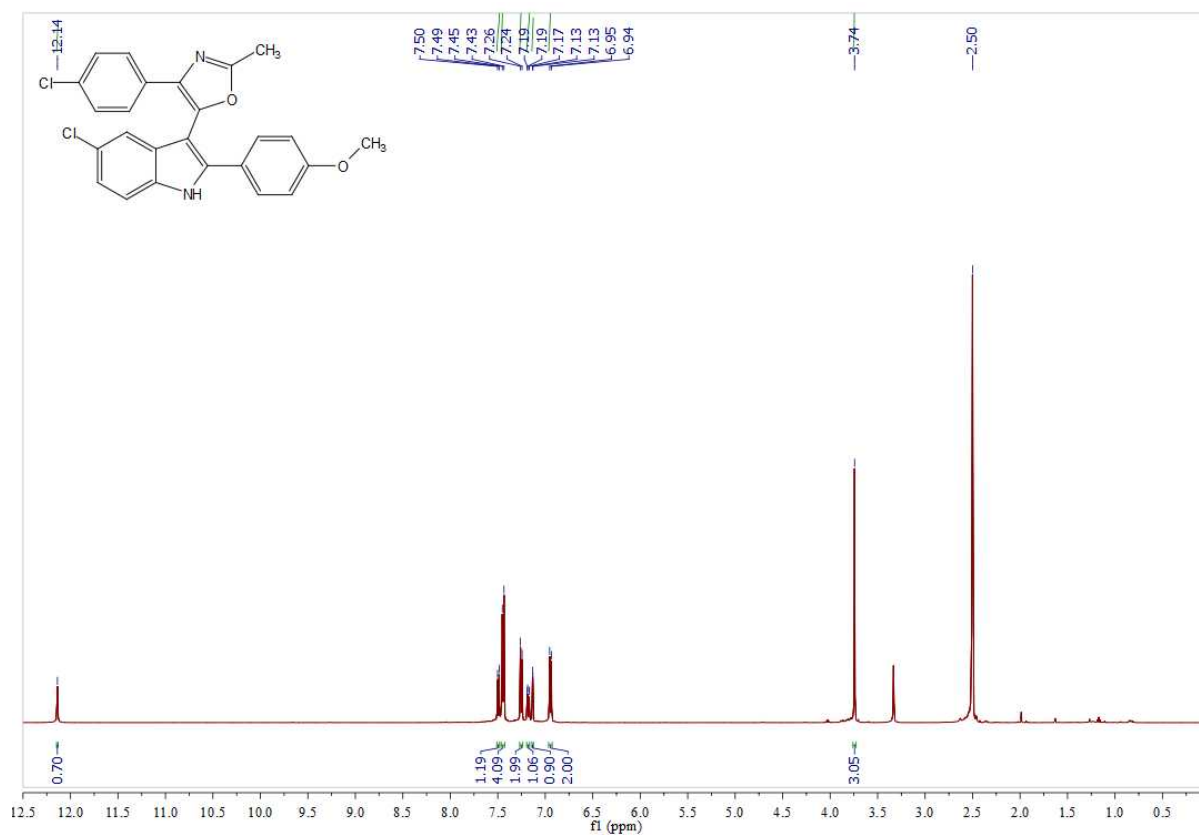

<sup>1</sup>H NMR of **4u** in DMSO-*d*<sub>6</sub> at 296 K ( $\delta$  in ppm).

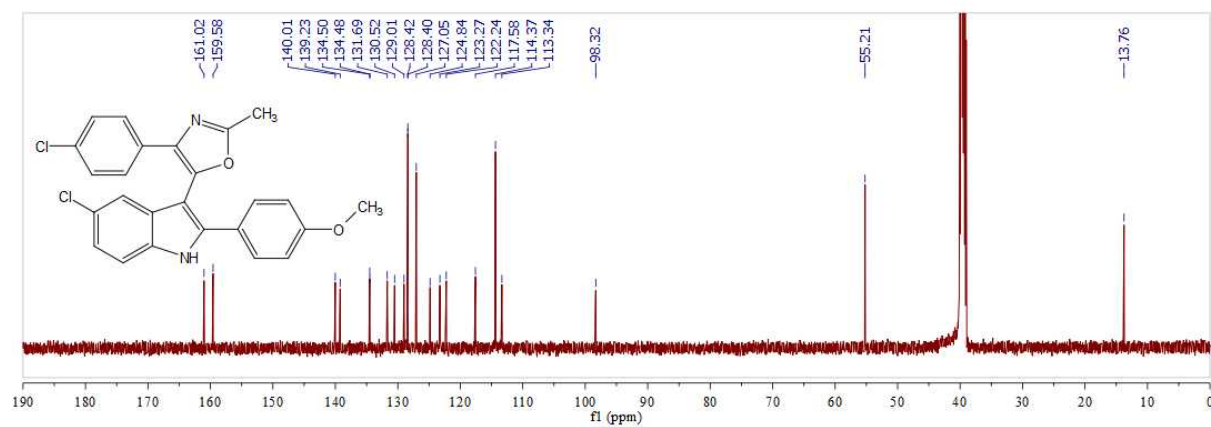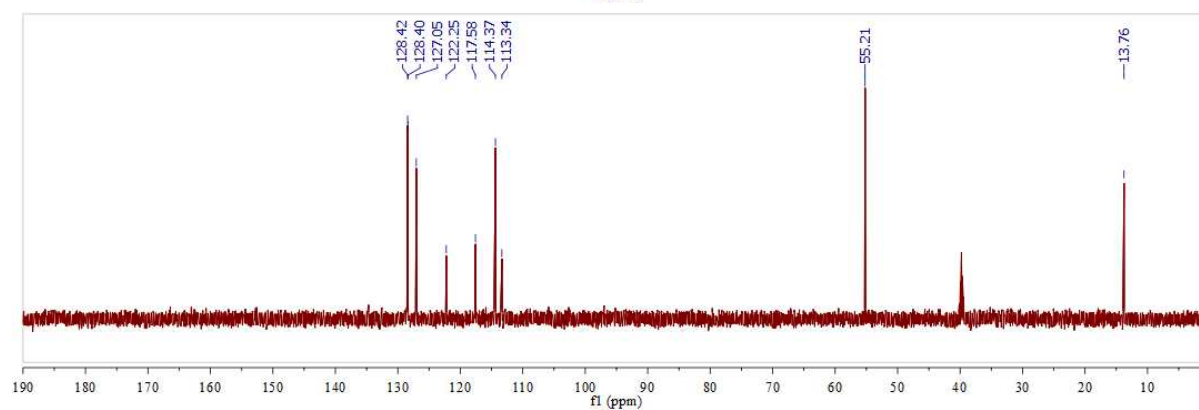

$^{13}\text{C}$  NMR and  $^{135}\text{-DEPT}$  Spectra of **4u** in  $\text{DMSO-d}_6$  at 296 K ( $\delta$  in ppm).

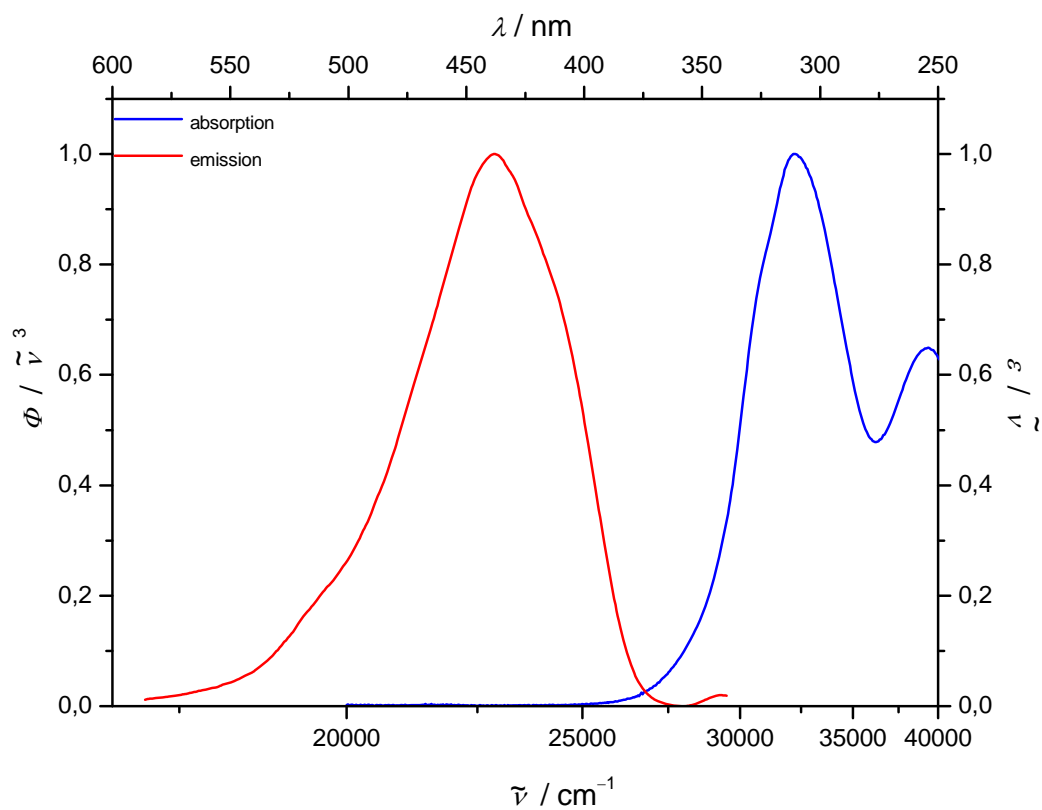

Normalized UV/Vis and fluorescence spectra of **4u** (recorded in EtOH at 298 K).

### 5-(5-Chloro-2-(furan-2-yl)-1H-indol-3-yl)-4-(4-chlorophenyl)-2-methyloxazole (4v)

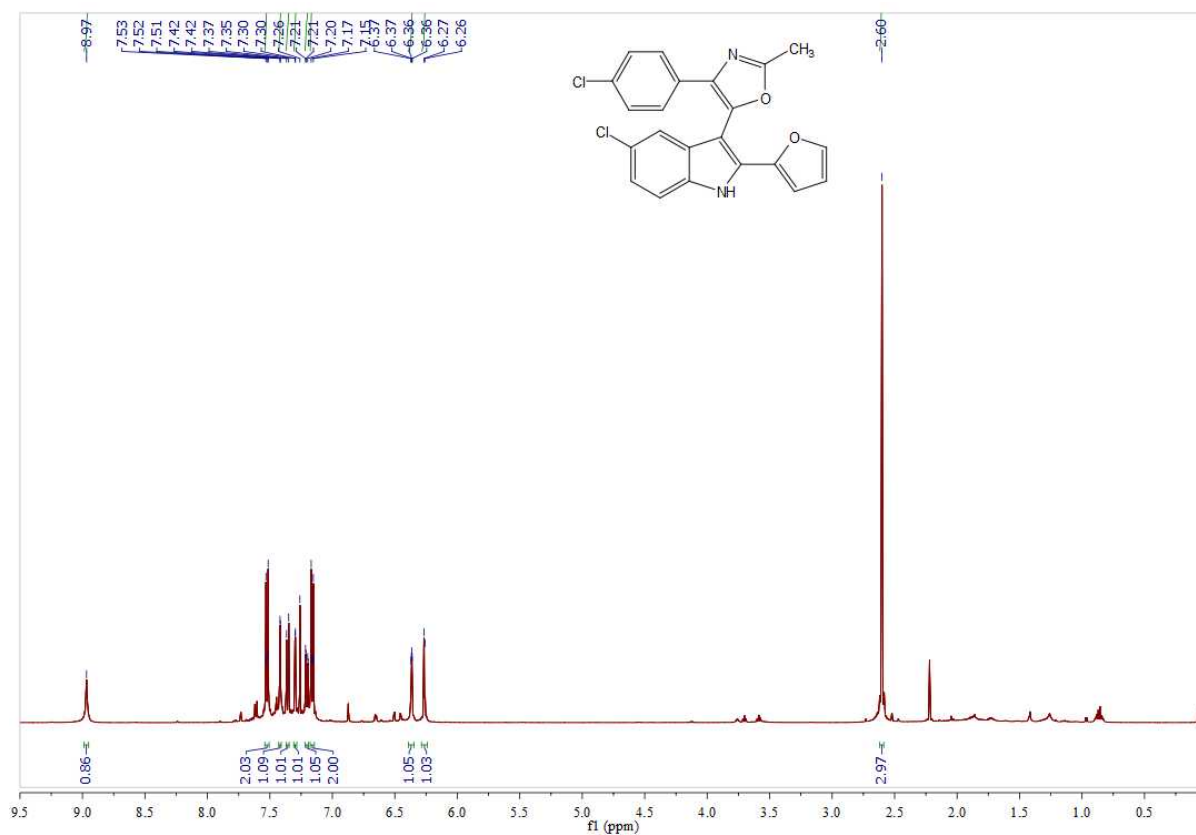

<sup>1</sup>H NMR of **4v** in CDCl<sub>3</sub> at 296 K (δ in ppm).

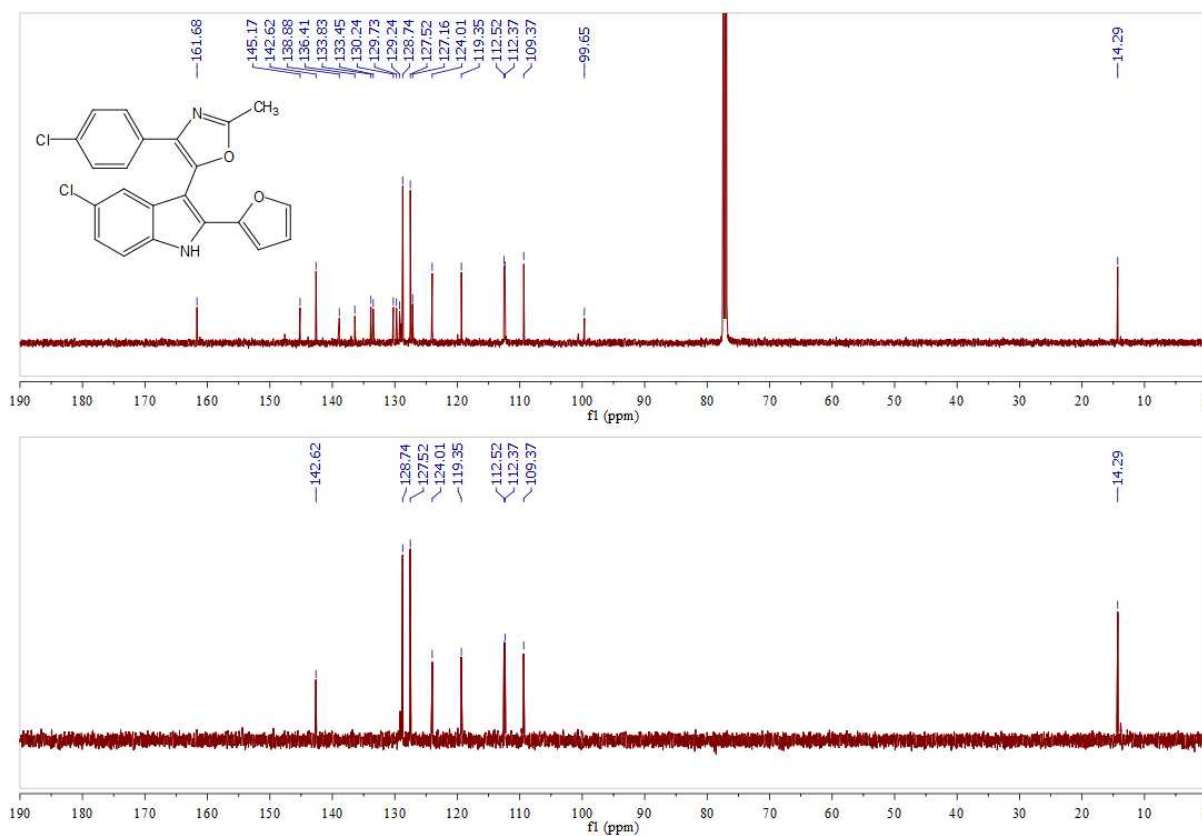

$^{13}\text{C}$  NMR and  $^{135}\text{-DEPT}$  Spectra of **4v** in  $\text{CDCl}_3$  at 296 K ( $\delta$  in ppm).

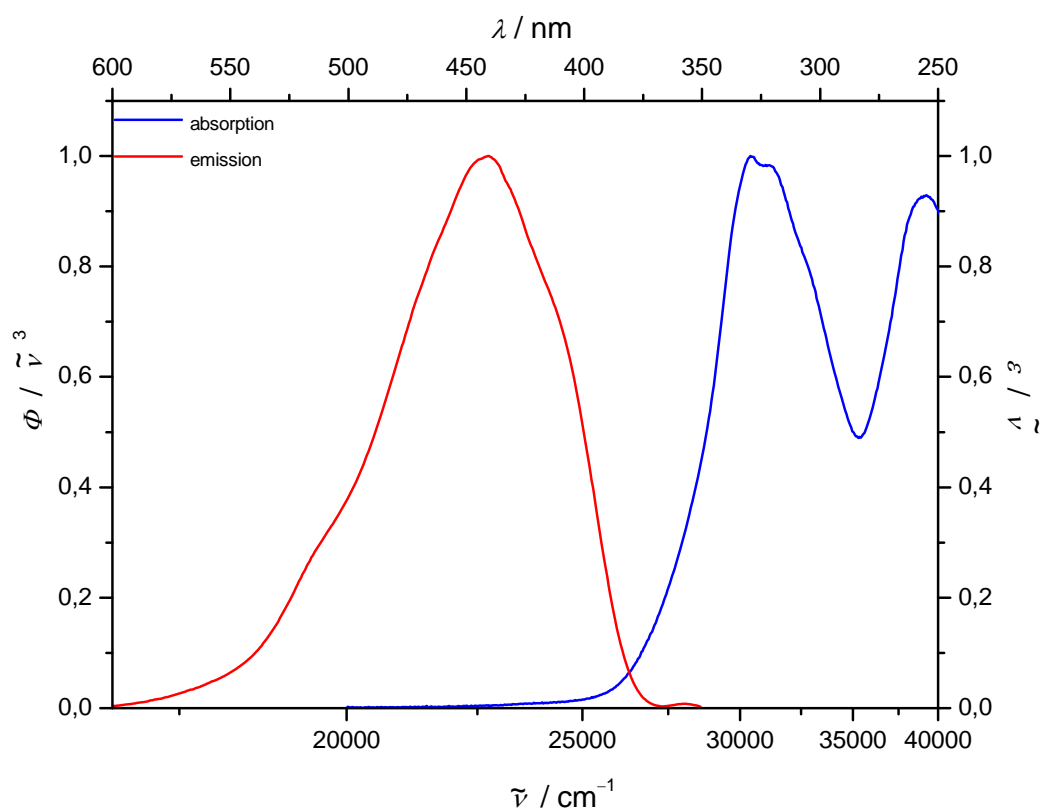

Normalized UV/Vis and fluorescence spectra of **4v** (recorded in EtOH at 298 K).



### 5-(5-Chloro-2-(furan-2-yl)-1H-indol-3-yl)-2-methyl-4-p-tolylloxazole (4w)

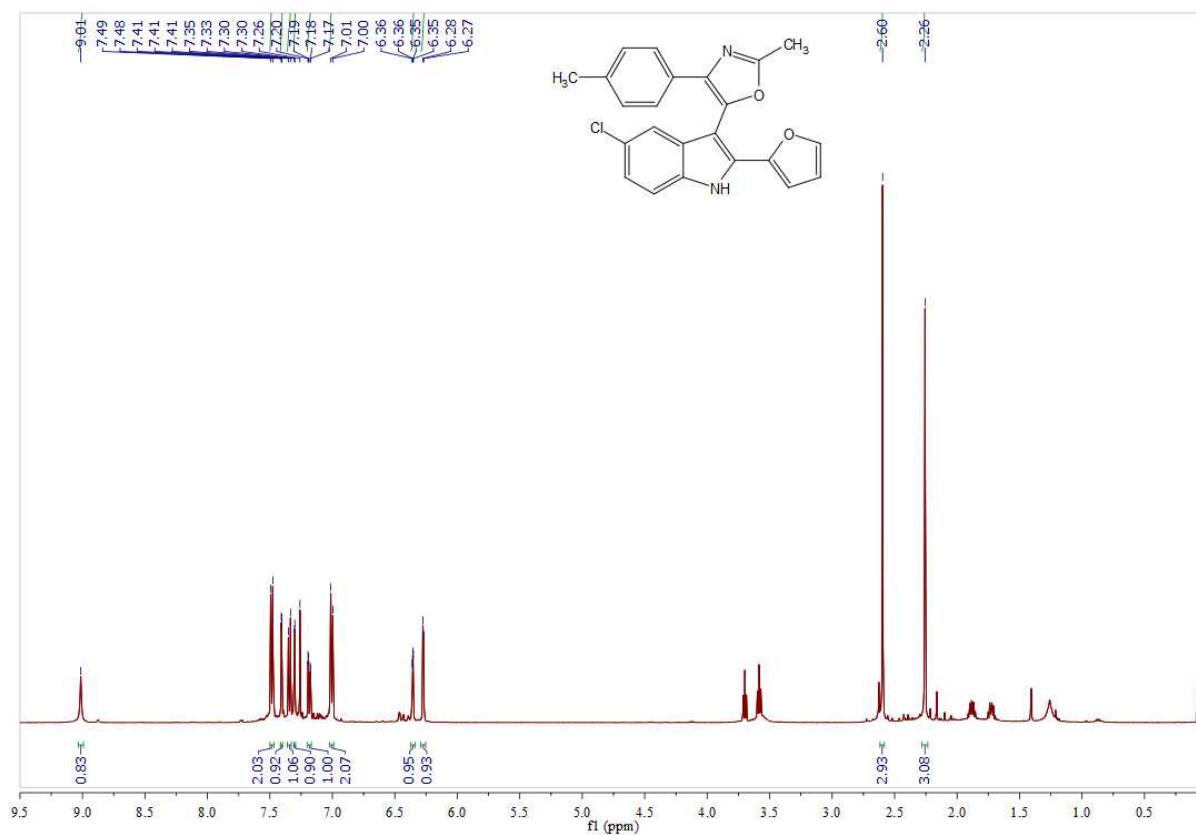

<sup>1</sup>H NMR of **4w** in CDCl<sub>3</sub> at 296 K (δ in ppm).

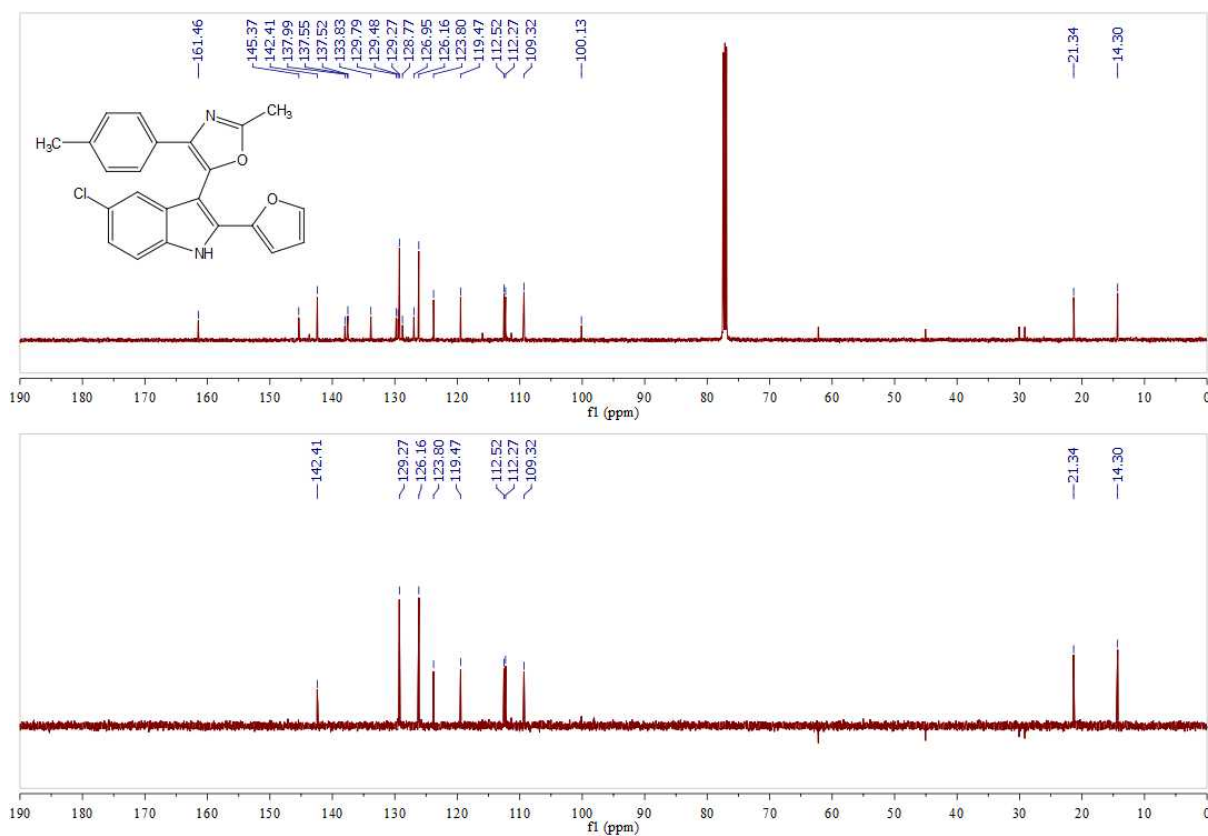

$^{13}\text{C}$  NMR and  $^{135}\text{-DEPT}$  Spectra of **4w** in  $\text{CDCl}_3$  at 296 K ( $\delta$  in ppm).

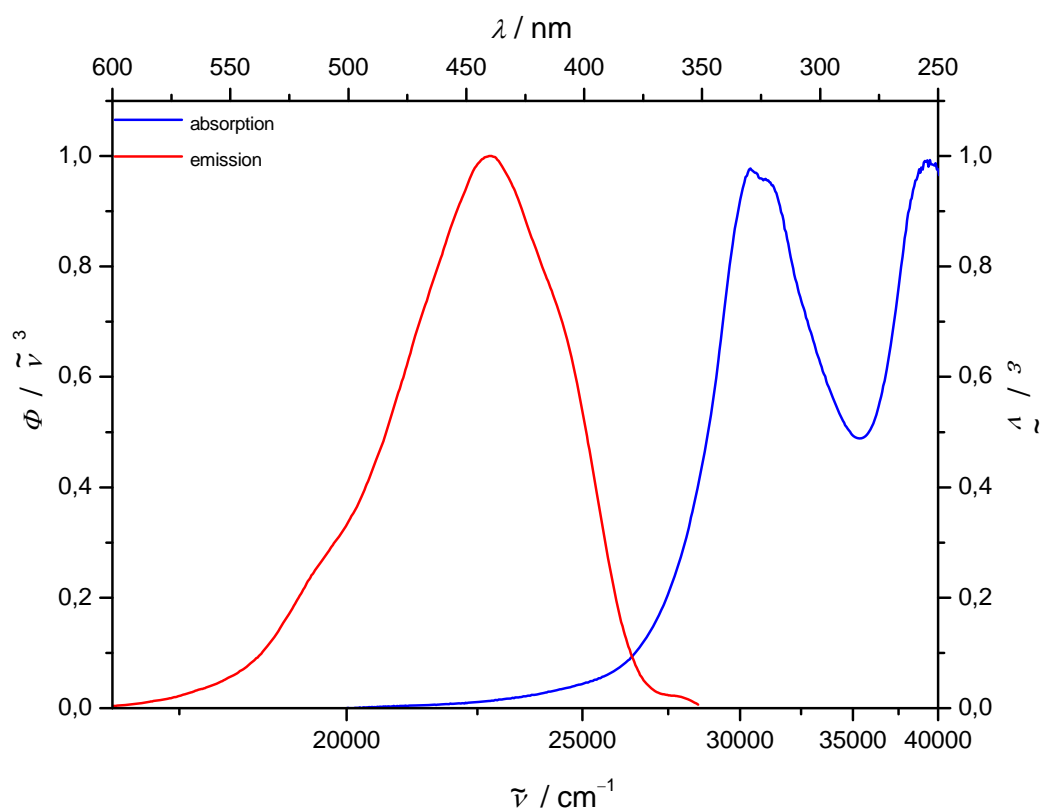

Normalized UV/Vis and fluorescence spectra of **4w** (recorded in EtOH at 298 K).

### 5-(5-Chloro-2-(3-chlorophenyl)-1H-indol-3-yl)-4-(4-chlorophenyl)-2-methyloxazole (4x)

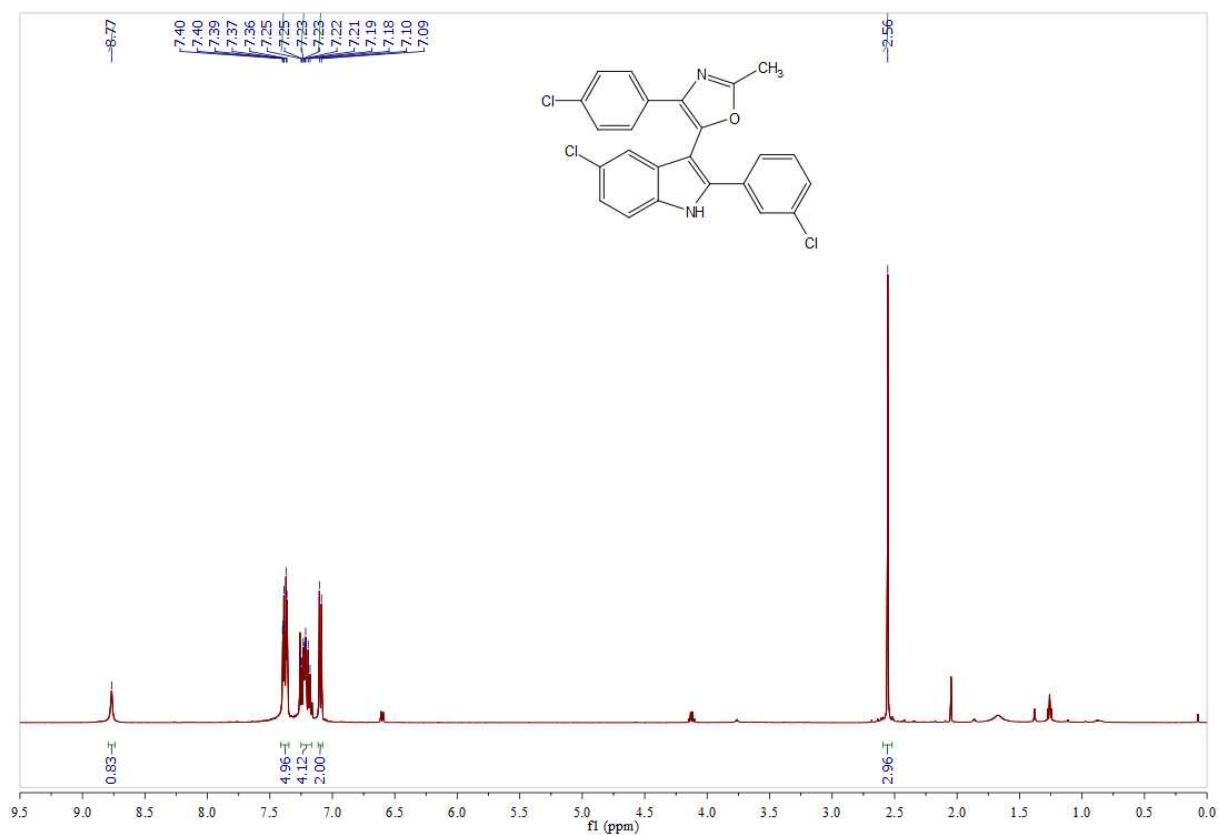

<sup>1</sup>H NMR of **4x** in CDCl<sub>3</sub> at 296 K (δ in ppm).

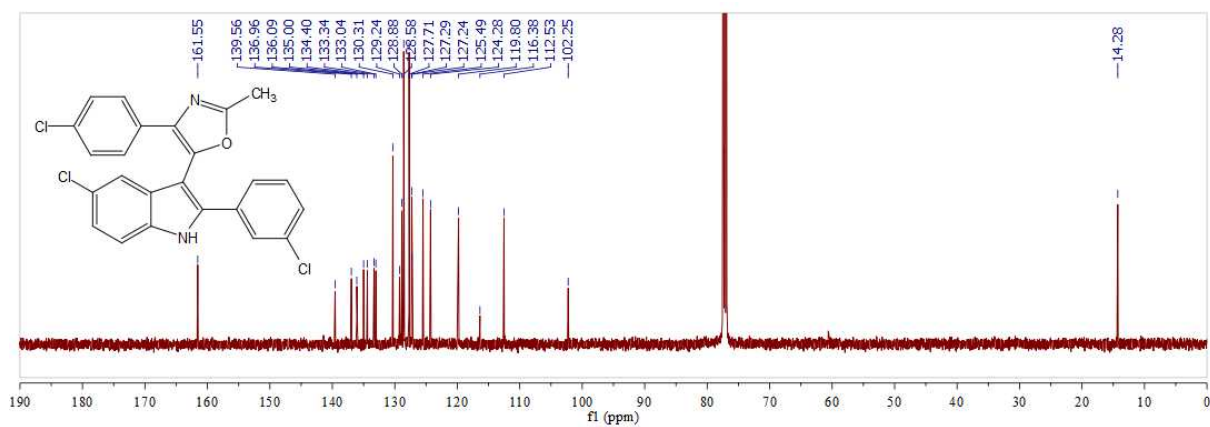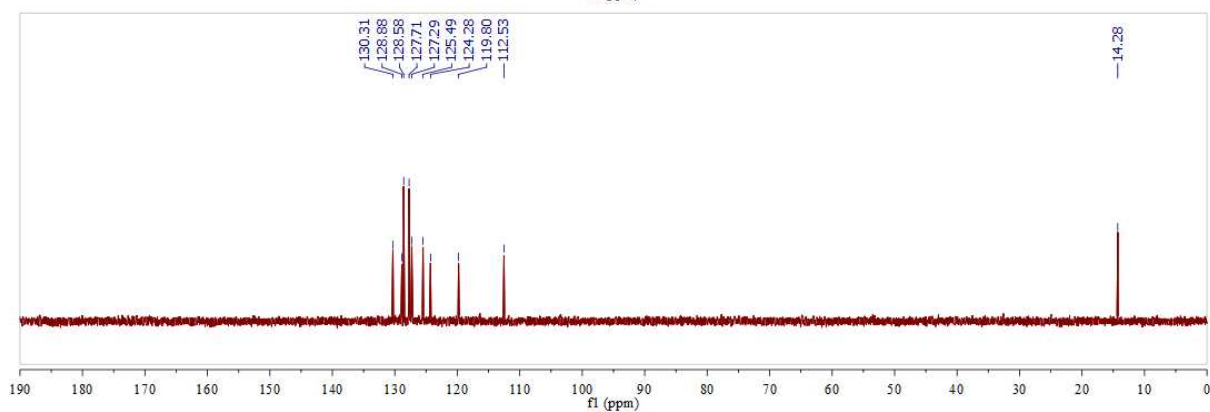

$^{13}\text{C}$  NMR and  $^{135}\text{-DEPT}$  Spectra of **4x** in  $\text{CDCl}_3$  at 296 K ( $\delta$  in ppm).

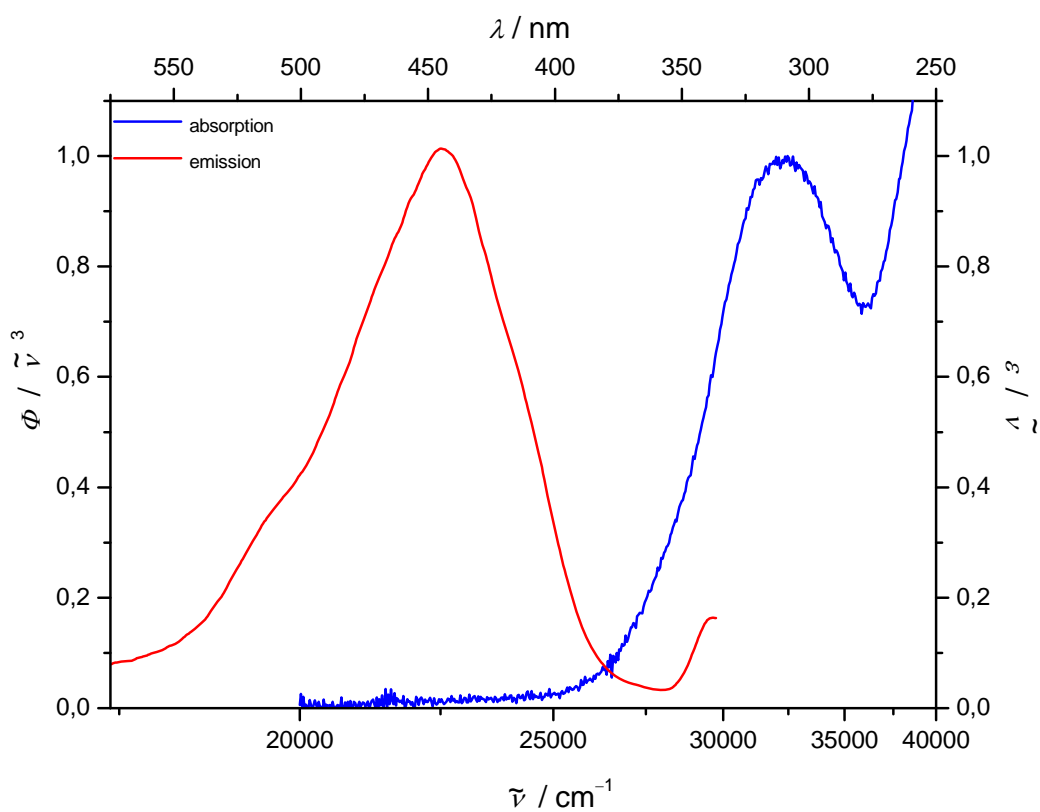

Normalized UV/Vis and fluorescence spectra of **4x** (recorded in EtOH at 298 K).

### 5-(5-Chloro-2-(3-chlorophenyl)-1*H*-indol-3-yl)-2-methyl-4-*p*-tolylloxazole (4y)

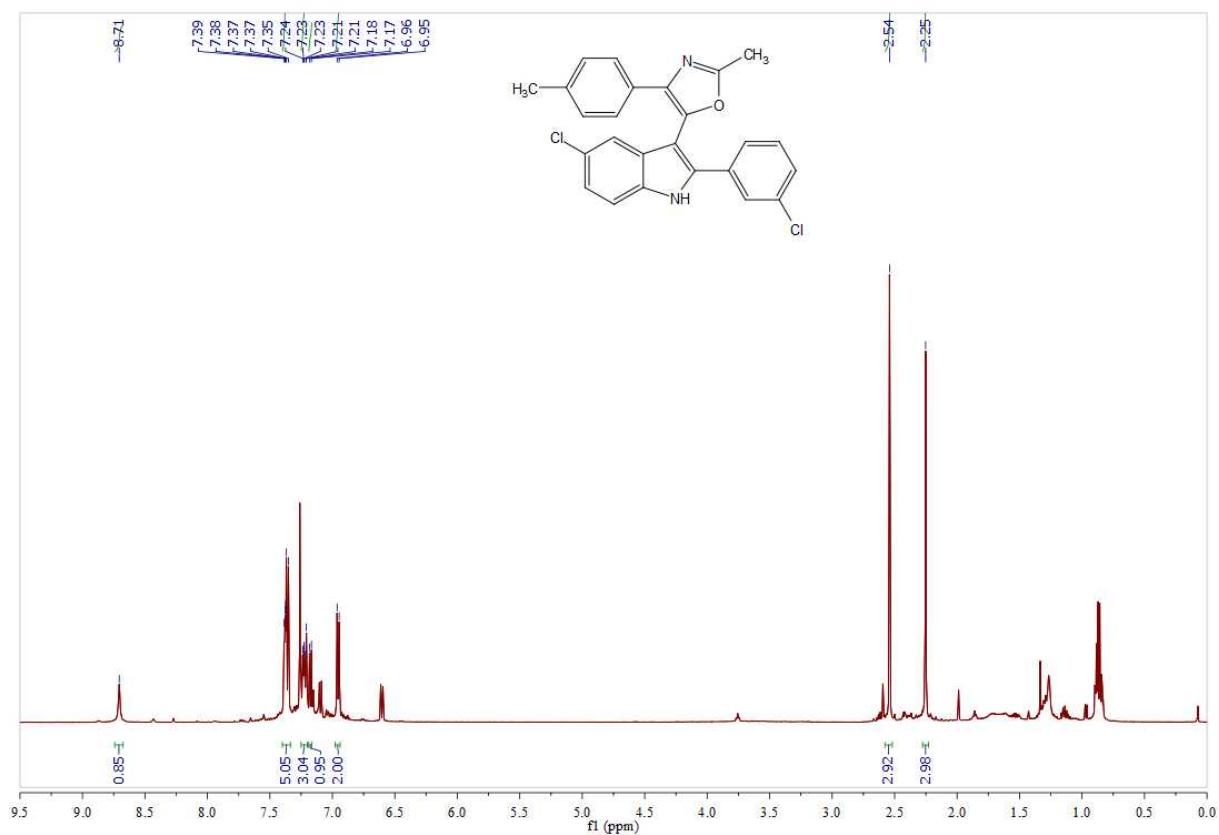

<sup>1</sup>H NMR of **4y** in CDCl<sub>3</sub> at 296 K (δ in ppm).

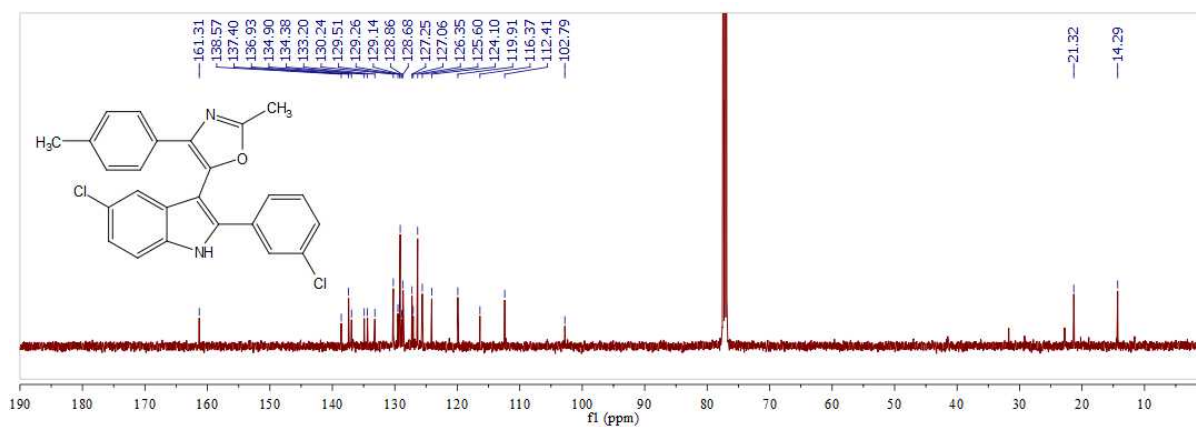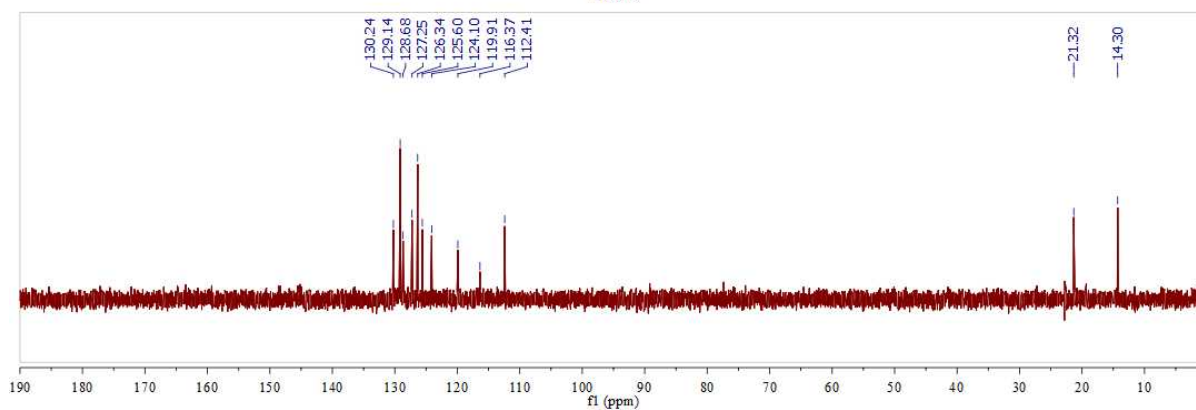

$^{13}\text{C}$  NMR and  $^{135}\text{-DEPT}$  Spectra of **4y** in  $\text{CDCl}_3$  at 296 K ( $\delta$  in ppm).

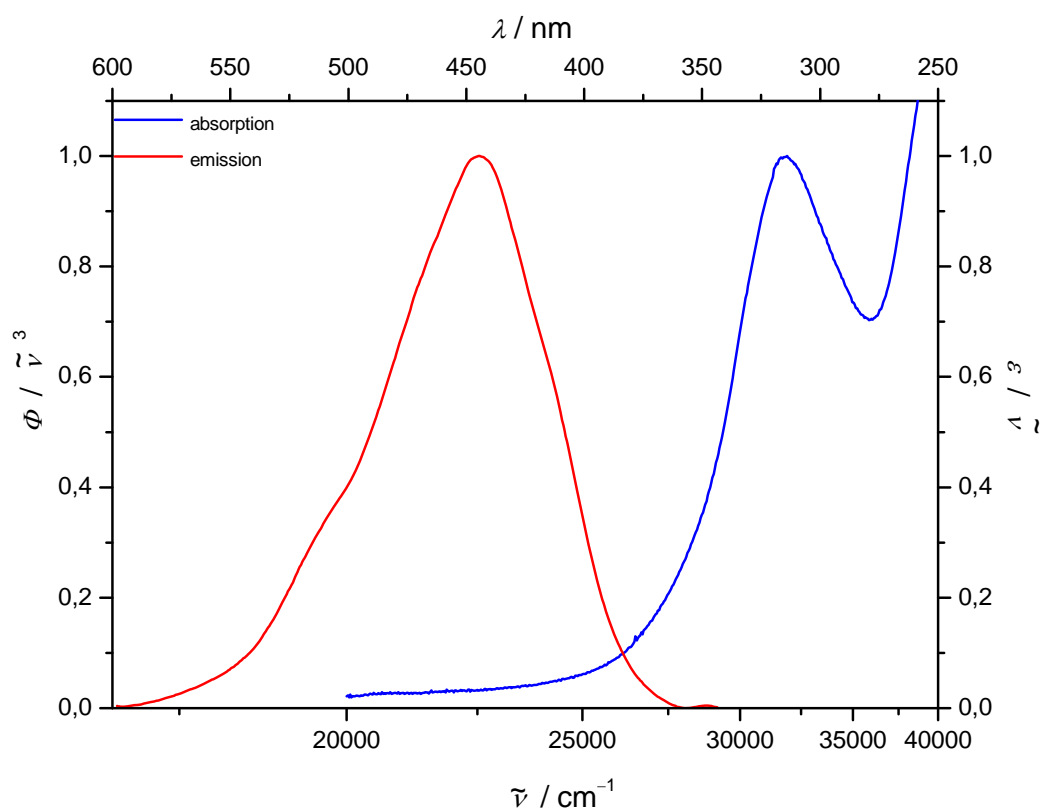

Normalized UV/Vis and fluorescence spectra of **4y** (recorded in EtOH at 298 K).

### Computed xyz-Coordinates of Compound 4x:

The geometries of the indolyloxazoles were optimized in a DFT calculation with the B3LYPfunctional and the 6-311+G(2d,p) basis set in the programme package *Gaussian03*. The minima structures were confirmed by analytical frequency analysis. Computational details of **4x**:

XYZ-coordinates:

```
C -2.7064 -1.4373 -0.9233
C -2.8839 -0.0840 -0.5996
C -4.1843 0.4433 -0.5797
C -5.2652 -0.3736 -0.8845
C -5.0953 -1.7153 -1.2049
C -3.8029 -2.2377 -1.2187
C -1.7370 0.7837 -0.3098
N -1.7492 2.1106 -0.6991
C -0.5625 2.7180 -0.3468
C 0.2192 1.7514 0.3313
C -0.5387 0.5235 0.3430
C 1.4708 2.1172 0.8496
C 1.8962 3.4174 0.6498
C 1.1268 4.3688 -0.0420
C -0.1180 4.0254 -0.5463
Cl 3.4649 3.9146 1.2836
C -0.1746 -0.7043 1.0319
O -1.0670 -1.1745 1.9807
C -0.4817 -2.2791 2.5101
N 0.6731 -2.5468 1.9988
C 0.8973 -1.5603 1.0351
C -1.2195 -3.0117 3.5713
C 2.1155 -1.5967 0.2165
C 2.2618 -0.8409 -0.9563
C 3.4250 -0.9110 -1.7143
```

|    |         |         |         |
|----|---------|---------|---------|
| C  | 4.4569  | -1.7472 | -1.3028 |
| C  | 4.3378  | -2.5150 | -0.1496 |
| C  | 3.1707  | -2.4384 | 0.6003  |
| Cl | 5.9324  | -1.8382 | -2.2588 |
| Cl | -6.8871 | 0.3083  | -0.8497 |
| H  | 1.5127  | 5.3710  | -0.1719 |
| H  | -0.7212 | 4.7575  | -1.0707 |
| H  | 2.0886  | 1.4071  | 1.3826  |
| H  | -2.4379 | 2.5041  | -1.3198 |
| H  | -0.6240 | -3.8648 | 3.8918  |
| H  | -2.1853 | -3.3651 | 3.2001  |
| H  | -1.4112 | -2.3630 | 4.4302  |
| H  | 1.4607  | -0.1946 | -1.2903 |
| H  | 3.5290  | -0.3240 | -2.6176 |
| H  | 5.1480  | -3.1642 | 0.1566  |
| H  | 3.0596  | -3.0371 | 1.4947  |
| H  | -4.3589 | 1.4729  | -0.2948 |
| H  | -5.9522 | -2.3334 | -1.4379 |
| H  | -3.6539 | -3.2802 | -1.4744 |
| H  | -1.7074 | -1.8523 | -0.9598 |



### Computed UV/vis Spectrum of Compound 4x by ZINDO-CI

The optimized structure was used in a ZINDO-CI calculation using the programme package *ArgusLab* 4.0.1 (M. A. Thompson, *ArgusLab* 4.0, Planaria Software LLC: Seattle, WA, USA, 2004.)

First three computed transitions of compound **4x**:

- 1) 344 nm, oscillator strength: 0.3153, orbitals involved: HOMO -> LUMO
- 2) 307 nm, oscillator strength: 0.072, HOMO-1 -> LUMO, HOMO-2 -> LUMO, and HOMO-1 -> LUMO+3
- 3) 296nm, oscillator strength: 0.3659, HOMO -> LUMO+1

### References

- M. A. Thompson, M. C. Zerner, *J. Am. Chem. Soc.*, 1991, **113**, 8210.
- M. A. Thompson, E. D. Glendening, D. Feller, *J. Phys. Chem.*, 1994, **98**, 10465.
- M. A. Thompson, G. K. Schenter, *J. Phys. Chem.*, 1995, **99**, 6374.
- M. A. Thompson, *J. Phys. Chem.*, 1996, **100**, 14492.
- M. C. Zerner, G. H. Loew, R. F. Kirchner, U. T. Mueller-Westerhoff, *J. Am. Chem. Soc.*, 1980, **102**, 589.
- C. Zorn, M. Bowen, S. Majewski, J. Walker, R. Wojcik, C. Hurlbut, W. Moser, *Nucl. Instrum. Methods Phys. Res. A*, 1988, **273**, 108.

### X-ray Structure Analysis of Compound 4x

Table 1. Crystal data and structure refinement for compound 4x (OPUS901A).

|                                   |                                                                  |                 |  |
|-----------------------------------|------------------------------------------------------------------|-----------------|--|
| Identification code               | opus901a                                                         |                 |  |
| Empirical formula                 | C <sub>24</sub> H <sub>15</sub> Cl <sub>3</sub> N <sub>2</sub> O |                 |  |
| Formula weight                    | 453.73                                                           |                 |  |
| Temperature                       | 291(2) K                                                         |                 |  |
| Wavelength                        | 0.71073 Å                                                        |                 |  |
| Crystal system                    | Monoclinic                                                       |                 |  |
| Space group                       | P 21/c                                                           |                 |  |
| Unit cell dimensions              | a = 7.5836(5) Å                                                  | α = 90°.        |  |
|                                   | b = 16.6354(15) Å                                                | β = 97.485(8)°. |  |
|                                   | c = 16.7866(10) Å                                                | γ = 90°.        |  |
| Volume                            | 2099.7(3) Å <sup>3</sup>                                         |                 |  |
| Z                                 | 4                                                                |                 |  |
| Density (calculated)              | 1.435 Mg/m <sup>3</sup>                                          |                 |  |
| Absorption coefficient            | 0.456 mm <sup>-1</sup>                                           |                 |  |
| F(000)                            | 928                                                              |                 |  |
| Crystal size                      | 0.27 x 0.10 x 0.08 mm <sup>3</sup>                               |                 |  |
| Theta range for data collection   | 2.45 to 25.00°.                                                  |                 |  |
| Index ranges                      | -9 ≤ h ≤ 9, -19 ≤ k ≤ 17, -19 ≤ l ≤ 16                           |                 |  |
| Reflections collected             | 8681                                                             |                 |  |
| Independent reflections           | 3606 [R(int) = 0.0968]                                           |                 |  |
| Completeness to theta = 25.00°    | 97.9 %                                                           |                 |  |
| Absorption correction             | None                                                             |                 |  |
| Refinement method                 | Full-matrix least-squares on F <sup>2</sup>                      |                 |  |
| Data / restraints / parameters    | 3606 / 0 / 273                                                   |                 |  |
| Goodness-of-fit on F <sup>2</sup> | 0.936                                                            |                 |  |
| Final R indices [I > 2σ(I)]       | R1 = 0.0387, wR2 = 0.0501                                        |                 |  |
| R indices (all data)              | R1 = 0.1556, wR2 = 0.0623                                        |                 |  |
| Largest diff. peak and hole       | 0.160 and -0.177 e.Å <sup>-3</sup>                               |                 |  |

Hydrogen bonds for compound 4x (OPUS901A) [Å and °].

| D-H...A            | d(D-H) | d(H...A) | d(D...A) | <(DHA) |
|--------------------|--------|----------|----------|--------|
| N(1)-H(1)...N(2)#1 | 0.86   | 2.27     | 3.084(6) | 159.0  |

Symmetry transformations used to generate equivalent atoms: x,-y+1/2,z-1/2
